# Supplementary material
Source: PubMed Central journal article supplement (PMC5345604)
Supplement: hdy2016110x1.pdf [file hdy2016110x1.pdf]

**Online Appendix A:** Karyotypic, Biological and Geographic traits utilized for analyses.

**Table S1.** Species utilised to estimate the rate of macrostructural karyotypic diversification (rKDmacro) for families.

| <b>Family</b>   | <b>Species</b>                      | <b>2n</b> | <b>FN</b> | <b>References</b> |
|-----------------|-------------------------------------|-----------|-----------|-------------------|
| Acrobatidae     | <i>Acrobates pygmaeus</i>           | 14        | 24        | 235               |
| Atelidae        | <i>Ateles belzebuth</i>             | 34        | 62        | 67                |
| Atelidae        | <i>Ateles geoffroyi</i>             | 34        | 62        | 67                |
| Atelidae        | <i>Ateles paniscus chamek</i>       | 34        | 62        | 67                |
| Atelidae        | <i>Alouatta caraya</i>              | 52        | 70        | 94                |
| Atelidae        | <i>Aloutta belzebul</i>             | 49/50     | 70        | 167               |
| Atelidae        | <i>Aloutta seniculus</i>            | 44        | 56        | 307               |
| Balaenidae      | <i>Balaena mysticetus</i>           | 42        | 74        | 149               |
| Balaenopteridae | <i>Balanoptera borealis</i>         | 44        | 77        | 312               |
| Balaenopteridae | <i>Balanoptera acutorostrata</i>    | 44        | 76        | 315               |
| Balaenopteridae | <i>Balanoptera physalus</i>         | 44        | 76        | 316               |
| Balaenopteridae | <i>Megaptera novaeangliae</i>       | 44        | 79        | 316               |
| Balaenopteridae | <i>Balaenoptera novaeangliae</i>    | 44        | 76        | 316               |
| Balaenopteridae | <i>Balaenoptera musculus</i>        | 44        | 78        | 317               |
| Barthyergidae   | <i>Heliophobus argenteocinereus</i> | 60        | 112       | 151               |
| Barthyergidae   | <i>Heterocephalus glaber</i>        | 60        | 112       | 151               |
| Bovidae         | <i>Boselaphus tragocamelus</i>      | 46        | 56        | 33                |
| Bovidae         | <i>Alcephalus busephalus</i>        | 40        | 58        | 56                |
| Bovidae         | <i>Ammotragus lervia</i>            | 58        | 56        | 56                |
| Bovidae         | <i>Bison bison</i>                  | 60        | 58        | 56                |
| Bovidae         | <i>Capra ibex</i>                   | 60        | 58        | 56                |
| Bovidae         | <i>Connochates taurinus</i>         | 58        | 58        | 56                |
| Bovidae         | <i>Ovis aries</i>                   | 54        | 58        | 58                |

|         |                                            |       |    |     |
|---------|--------------------------------------------|-------|----|-----|
| Bovidae | <i>Ovis nivicola</i>                       | 52    | 58 | 58  |
| Bovidae | <i>Pseudois nayaur</i>                     | 54    | 58 | 59  |
| Bovidae | <i>Hemitragus jemlahicus</i>               | 48    | 58 | 64  |
| Bovidae | <i>Rhynchotragus kirki</i>                 | 46    | 46 | 64  |
| Bovidae | <i>Damaliscus dorcas phillipsi</i>         | 38    | 58 | 69  |
| Bovidae | <i>Addax nasomaculatus</i>                 | 58    | 58 | 70  |
| Bovidae | <i>Capra hircus</i>                        | 60    | 58 | 79  |
| Bovidae | <i>Aepyceros melampus</i>                  | 60    | 58 | 92  |
| Bovidae | <i>Gazella granti</i>                      | 30/31 | 56 | 92  |
| Bovidae | <i>Gazella spekei</i>                      | 33/32 | 56 | 92  |
| Bovidae | <i>Litocranius walleri</i>                 | 60    | 58 | 92  |
| Bovidae | <i>Bos taurus</i>                          | 60    | 58 | 109 |
| Bovidae | <i>Bos gaurus</i>                          | 58    | 58 | 109 |
| Bovidae | <i>Syncerus caffer</i>                     | 52    | 58 | 109 |
| Bovidae | <i>Oreamnos americanus</i>                 | 42    | 58 | 126 |
| Bovidae | <i>Rupicapra rupicapra</i>                 | 58    | 58 | 126 |
| Bovidae | <i>Murrah buffalo</i>                      | 50    | 58 | 148 |
| Bovidae | <i>Kobus ellipsiprymnus defassa</i>        | 54    | 58 | 156 |
| Bovidae | <i>Kobus ellipsiprymnus ellipsiprymnus</i> | 50    | 58 | 156 |
| Bovidae | <i>Oryx dammah</i>                         | 58    | 58 | 159 |
| Bovidae | <i>Oryx gazella gazella</i>                | 56    | 58 | 159 |
| Bovidae | <i>Oryx gazella beisa</i>                  | 58    | 58 | 159 |
| Bovidae | <i>Oryx leucoryx</i>                       | 58    | 58 | 159 |
| Bovidae | <i>Ovis dalli dalli</i>                    | 54    | 58 | 194 |
| Bovidae | <i>Ovis musimon</i>                        | 54    | 58 | 194 |
| Bovidae | <i>Ovis ammon cycloceros</i>               | 58    | 58 | 194 |
| Bovidae | <i>Ovis canadiensis mexicana</i>           | 54    | 58 | 200 |
| Bovidae | <i>Ovis ammon severtzovi</i>               | 56    | 58 | 201 |

|               |                                    |       |    |     |
|---------------|------------------------------------|-------|----|-----|
| Bovidae       | <i>Ovis vignei</i>                 | 58    | 58 | 201 |
| Bovidae       | <i>Cephalophus maxwellii</i>       | 60    | 58 | 234 |
| Bovidae       | <i>Cephalophus dorsalis</i>        | 60    | 58 | 234 |
| Bovidae       | <i>Cephalophus silvicultor</i>     | 60    | 58 | 234 |
| Bovidae       | <i>Cephalophus monticola</i>       | 60    | 58 | 234 |
| Bovidae       | <i>Cephalophus natelensis</i>      | 60    | 58 | 234 |
| Bovidae       | <i>Sylvicapra grimmia</i>          | 60    | 58 | 234 |
| Bovidae       | <i>Bubalus bubalis</i>             | 50    | 58 | 271 |
| Bovidae       | <i>Bubalus mindorensis</i>         | 46    | 56 | 271 |
| Bovidae       | <i>Antilope cervicapra</i>         | 30/31 | 56 | 275 |
| Bovidae       | <i>Antidorcas marsupialis</i>      | 56    | 58 | 275 |
| Bovidae       | <i>Gazella cuvieri</i>             | 32/33 | 56 | 275 |
| Bovidae       | <i>Gazella dama mhorh</i>          | 40    | 56 | 275 |
| Bovidae       | <i>Gazella dama ruficollis</i>     | 38    | 56 | 275 |
| Bovidae       | <i>Gazella dorcas</i>              | 30/31 | 56 | 275 |
| Bovidae       | <i>Gazella gazella erlangeri</i>   | 34    | 58 | 275 |
| Bovidae       | <i>Gazella leptoceros</i>          | 32/33 | 56 | 275 |
| Bovidae       | <i>Gazella rufifrons</i>           | 58    | 56 | 275 |
| Bovidae       | <i>Gazella soemmerringi</i>        | 36    | 56 | 275 |
| Bovidae       | <i>Gazella subgutturosa marica</i> | 30    | 56 | 275 |
| Bovidae       | <i>Gazella thomsoni</i>            | 58    | 56 | 275 |
| Bovidae       | <i>Naomorphedus goral</i>          | 55    | 54 | 295 |
| Bovidae       | <i>Oryx tao</i>                    | 58    | 58 | 295 |
| Caenolestidae | <i>Rhyncholestes raphanurus</i>    | 14    | 26 | 7   |
| Camelidae     | <i>Camelus bactrianus</i>          | 74    | 82 | 272 |
| Camelidae     | <i>Lama huanacus</i>               | 74    | 82 | 272 |
| Camelidae     | <i>Vicugna vicugna</i>             | 74    | 82 | 272 |
| Canidae       | <i>Pseudoalopex gymnocercus</i>    | 74    | 72 | 55  |

|             |                                 |    |     |     |
|-------------|---------------------------------|----|-----|-----|
| Canidae     | <i>Pseudoalopex griseus</i>     | 74 | 72  | 55  |
| Canidae     | <i>Canis lupus</i>              | 78 | 76  | 290 |
| Canidae     | <i>Cerdocyon thous</i>          | 74 | 106 | 290 |
| Canidae     | <i>Chrysocyon brachyurus</i>    | 76 | 74  | 290 |
| Canidae     | <i>Fennecus zerda</i>           | 64 | 66  | 290 |
| Canidae     | <i>Otcyon megalotis</i>         | 72 | 74  | 290 |
| Canidae     | <i>Speothos venaticus</i>       | 74 | 72  | 290 |
| Canidae     | <i>Urocyon cinereoargenteus</i> | 66 | 66  | 290 |
| Canidae     | <i>Alopex lagopus</i>           | 50 | 96  | 291 |
| Canidae     | <i>Nyctereutes prcyonoides</i>  | 42 | 66  | 291 |
| Canidae     | <i>Vulpes macrotis</i>          | 50 | 96  | 291 |
| Canidae     | <i>Vulpes vulpes</i>            | 36 | 66  | 291 |
| Canidae     | <i>Canis latrans</i>            | 78 | 76  | 301 |
| Castoroidea | <i>Castor canadensis</i>        | 40 | 76  | 118 |
| Castoroidea | <i>Castor fiber</i>             | 48 | 74  | 151 |
| Caviidae    | <i>Cavia porcellus</i>          | 64 | 90  | 71  |
| Caviidae    | <i>Cavia cobaya</i>             | 64 | 80  | 288 |
| Caviidae    | <i>Dolichotis patagonum</i>     | 64 | 124 | 297 |
| Cebidae     | <i>Callimico goeldii</i>        | 48 | 78  | 67  |
| Cebidae     | <i>Cebus apella</i>             | 54 | 78  | 67  |
| Cebidae     | <i>Callicebus cupreus</i>       | 46 | 64  | 67  |
| Cebidae     | <i>Cebus capucinus</i>          | 54 | 68  | 84  |
| Cebidae     | <i>Lagothrix lagotricha</i>     | 62 | 90  | 90  |
| Cebidae     | <i>Callicebus moloch</i>        | 46 | 64  | 96  |
| Cebidae     | <i>Callicebus torquatus</i>     | 20 | 26  | 96  |
| Cebidae     | <i>Saimiri boliviensis</i>      | 44 | 72  | 114 |
| Cebidae     | <i>Cacajao calvus</i>           | 46 | 62  | 158 |
| Cebidae     | <i>Cacajao melanocephalus</i>   | 45 | 62  | 158 |

|                  |                                |    |     |     |
|------------------|--------------------------------|----|-----|-----|
| Cebidae          | <i>Cacajao rubicundus</i>      | 46 | 62  | 158 |
| Cebidae          | <i>Chiropotes satanus</i>      | 54 | 74  | 158 |
| Cebidae          | <i>Pithecia pithecia</i>       | 48 | 64  | 158 |
| Cebidae          | <i>Cebus nigrivittatus</i>     | 52 | 68  | 176 |
| Cebidae          | <i>Saimiri sciureus</i>        | 44 | 72  | 318 |
| Cercopithecidae  | <i>Cynopithecus niger</i>      | 42 | 80  | 274 |
| Cercopithecoidae | <i>Papio hamadryas</i>         | 42 | 80  | 35  |
| Cercopithecoidae | <i>Papio ursinus</i>           | 42 | 80  | 35  |
| Cercopithecoidae | <i>Cercocebus atys</i>         | 42 | 80  | 54  |
| Cercopithecoidae | <i>Maccaca arctoides</i>       | 42 | 80  | 54  |
| Cercopithecoidae | <i>Maccaca fascicularis</i>    | 42 | 80  | 54  |
| Cercopithecoidae | <i>Maccaca mulatta</i>         | 42 | 80  | 54  |
| Cercopithecoidae | <i>Maccaca nemestrina</i>      | 42 | 80  | 54  |
| Cercopithecoidae | <i>Maccaca nigra</i>           | 42 | 80  | 54  |
| Cercopithecoidae | <i>Maccaca radiata</i>         | 42 | 80  | 54  |
| Cercopithecoidae | <i>Nasalis larvatus</i>        | 48 | 92  | 66  |
| Cercopithecoidae | <i>Cercocebus torquatus</i>    | 42 | 80  | 67  |
| Cercopithecoidae | <i>Cercopithecus nictitans</i> | 66 | 116 | 67  |
| Cercopithecoidae | <i>Erythrocebus patas</i>      | 54 | 94  | 67  |
| Cercopithecoidae | <i>Maccaca irus</i>            | 42 | 80  | 67  |
| Cercopithecoidae | <i>Papio dogera</i>            | 42 | 80  | 67  |
| Cercopithecoidae | <i>Papio papio</i>             | 42 | 80  | 88  |
| Cercopithecoidae | <i>Papio anubis</i>            | 42 | 80  | 89  |
| Cercopithecoidae | <i>Maccaca fuscata</i>         | 42 | 80  | 93  |
| Cercopithecoidae | <i>Maccaca speciosa</i>        | 42 | 80  | 93  |
| Cercopithecoidae | <i>Cercopithecus aethiops</i>  | 60 | 90  | 100 |
| Cercopithecoidae | <i>Cercocebus aterrimus</i>    | 42 | 80  | 157 |
| Cercopithecoidae | <i>Presbytis entelus</i>       | 44 | 82  | 274 |

|          |                                    |    |    |     |
|----------|------------------------------------|----|----|-----|
| Cervidae | <i>Rucervus duvauceli</i>          | 56 | 68 | 64  |
| Cervidae | <i>Alces alces</i>                 | 68 | 70 | 104 |
| Cervidae | <i>Alces alces americana</i>       | 70 | 70 | 104 |
| Cervidae | <i>Axis axis</i>                   | 66 | 68 | 104 |
| Cervidae | <i>Axis porcinus</i>               | 68 | 68 | 104 |
| Cervidae | <i>Blastocerus dichotomus</i>      | 66 | 70 | 104 |
| Cervidae | <i>Capreolus capreolus</i>         | 70 | 68 | 104 |
| Cervidae | <i>Cervus albirostris</i>          | 66 | 68 | 104 |
| Cervidae | <i>Cervus aldithamin</i>           | 58 | 68 | 104 |
| Cervidae | <i>Cervus duvauceli</i>            | 56 | 68 | 104 |
| Cervidae | <i>Cervus elaphus</i>              | 68 | 68 | 104 |
| Cervidae | <i>Cervus timorensis</i>           | 60 | 68 | 104 |
| Cervidae | <i>Cervus nippon</i>               | 68 | 68 | 104 |
| Cervidae | <i>Cervus unicolor</i>             | 58 | 68 | 104 |
| Cervidae | <i>Cervus unicolor djejeani</i>    | 62 | 68 | 104 |
| Cervidae | <i>Dama dama</i>                   | 68 | 68 | 104 |
| Cervidae | <i>Elaphodus cephalodus</i>        | 48 | 50 | 104 |
| Cervidae | <i>Elaphurus davidianus</i>        | 68 | 68 | 104 |
| Cervidae | <i>Hippocamelus bisulcus</i>       | 70 | 70 | 104 |
| Cervidae | <i>Hydropotes inermis</i>          | 70 | 68 | 104 |
| Cervidae | <i>Mazama americana</i>            | 68 | 70 | 104 |
| Cervidae | <i>Mazama gouazoubira</i>          | 70 | 68 | 104 |
| Cervidae | <i>Muntiacus muntjak vaginalis</i> | 6  | 8  | 104 |
| Cervidae | <i>Muntiacus muntjak muntjak</i>   | 8  | 10 | 104 |
| Cervidae | <i>Muntiacus reevesi</i>           | 46 | 44 | 104 |
| Cervidae | <i>Muntiacus feai</i>              | 13 | 12 | 104 |
| Cervidae | <i>Muntiacus rooseveltorun</i>     | 6  | 8  | 104 |
| Cervidae | <i>Odocoileus hemionus</i>         | 70 | 70 | 104 |

|                 |                                            |    |     |     |
|-----------------|--------------------------------------------|----|-----|-----|
| Cervidae        | <i>Odocoileus virginianus</i>              | 70 | 70  | 104 |
| Cervidae        | <i>Ozotoceros bezoarticus</i>              | 68 | 70  | 104 |
| Cervidae        | <i>Pudu puda</i>                           | 70 | 70  | 104 |
| Cervidae        | <i>Rangifer tarandus</i>                   | 70 | 70  | 104 |
| Cervidae        | <i>Muntiacus crinifrons</i>                | 8  | 10  | 303 |
| Cheirogaleidae  | <i>Microcebus myoxinus</i>                 | 66 | 64  | 30  |
| Cheirogaleidae  | <i>Microcebus rufus</i>                    | 66 | 64  | 30  |
| Cheirogaleidae  | <i>Chheirogaleus medius</i>                | 66 | 64  | 80  |
| Cheirogaleidae  | <i>Microcebus murinus</i>                  | 66 | 64  | 238 |
| Cheirogaleidae  | <i>Chheirogaleus major</i>                 | 66 | 64  | 240 |
| Cheirogaleidae  | <i>Microcebus coquereli</i>                | 66 | 64  | 240 |
| Cheirogaleidae  | <i>Phaner furcifer</i>                     | 46 | 60  | 240 |
| Chinchillidae   | <i>Lagostomus maximus</i>                  | 56 | 106 | 297 |
| Chrysochloridae | <i>Chorotalpa duthieae</i>                 | 30 | 60  | 31  |
| Chrysochloridae | <i>Chorotalpa sclareti</i>                 | 30 | 58  | 31  |
| Chrysochloridae | <i>Amblysomus julianae</i>                 | 30 | 54  | 31  |
| Chrysochloridae | <i>Amblysomus hottentotus (durban)</i>     | 30 | 54  | 31  |
| Chrysochloridae | <i>Amblysomus hottentotus (dullstroom)</i> | 36 | 60  | 31  |
| Chrysochloridae | <i>Amblysomus iris</i>                     | 34 | 68  | 32  |
| Cricetidae      | <i>Oryzomys albigularis</i>                | 66 | 102 | 1   |
| Cricetidae      | <i>Neotoma albigula</i>                    | 52 | 58  | 17  |
| Cricetidae      | <i>Neotoma floridana</i>                   | 52 | 56  | 17  |
| Cricetidae      | <i>Neotoma fuscipes</i>                    | 56 | 84  | 17  |
| Cricetidae      | <i>Neotoma lepida</i>                      | 52 | 60  | 17  |
| Cricetidae      | <i>Neotoma mexicana</i>                    | 52 | 52  | 17  |
| Cricetidae      | <i>Neotoma micropus</i>                    | 52 | 56  | 17  |
| Cricetidae      | <i>Neotoma phenax</i>                      | 38 | 50  | 17  |
| Cricetidae      | <i>Neotoma stephensi</i>                   | 52 | 58  | 17  |

|            |                                    |    |     |     |
|------------|------------------------------------|----|-----|-----|
| Cricetidae | <i>Nectomys palmipes</i>           | 16 | 22  | 22  |
| Cricetidae | <i>Reithrodontomys fulvescens</i>  | 50 | 48  | 63  |
| Cricetidae | <i>Reithrodontomys megalotis</i>   | 42 | 80  | 63  |
| Cricetidae | <i>Reithrodontomys raviventris</i> | 38 | 72  | 63  |
| Cricetidae | <i>Reithrodontomys sumichrasti</i> | 40 | 76  | 63  |
| Cricetidae | <i>Peromyscus sp</i>               | 48 | 52  | 72  |
| Cricetidae | <i>Sigmodon arizonae</i>           | 22 | 38  | 97  |
| Cricetidae | <i>Sigmodon hispidus</i>           | 52 | 52  | 97  |
| Cricetidae | <i>Sigmodon mascotensis</i>        | 28 | 28  | 97  |
| Cricetidae | <i>Scapteromys timidus</i>         | 36 | 40  | 107 |
| Cricetidae | <i>Scapteromys timidus (2)</i>     | 34 | 40  | 107 |
| Cricetidae | <i>Scapteromys timidus (3)</i>     | 24 | 40  | 107 |
| Cricetidae | <i>Cricetulus griseus</i>          | 22 | 34  | 108 |
| Cricetidae | <i>Cricetulus triton</i>           | 28 | 30  | 108 |
| Cricetidae | <i>Clethrionomys rufocanus</i>     | 56 | 56  | 112 |
| Cricetidae | <i>Clethrionomys glareolus</i>     | 56 | 56  | 112 |
| Cricetidae | <i>Anotomys leander</i>            | 92 | 98  | 115 |
| Cricetidae | <i>Akodon lindberghi</i>           | 42 | 40  | 117 |
| Cricetidae | <i>Akodon montensis</i>            | 24 | 38  | 117 |
| Cricetidae | <i>Bolomys lasiurus</i>            | 34 | 32  | 117 |
| Cricetidae | <i>Dicrostonyx torquatus</i>       | 46 | 52  | 121 |
| Cricetidae | <i>Lemmus amurensis</i>            | 50 | 48  | 122 |
| Cricetidae | <i>Lemmus lemmus</i>               | 50 | 48  | 122 |
| Cricetidae | <i>Lemmus nigripes</i>             | 50 | 52  | 122 |
| Cricetidae | <i>Lemmus sibiricus sibiricus</i>  | 50 | 52  | 122 |
| Cricetidae | <i>Lemmus trimicornatus</i>        | 50 | 52  | 122 |
| Cricetidae | <i>Oryzomys alfaroi</i>            | 60 | 104 | 127 |
| Cricetidae | <i>Oryzomys caudatus</i>           | 58 | 68  | 127 |



|            |                                  |    |    |     |
|------------|----------------------------------|----|----|-----|
| Cricetidae | <i>Oryzomys fulvescens</i>       | 60 | 74 | 127 |
| Cricetidae | <i>Oryzomys melanotis</i>        | 62 | 70 | 127 |
| Cricetidae | <i>Sigmodon minimus</i>          | 30 | 34 | 140 |
| Cricetidae | <i>Akodon aerosus</i>            | 40 | 38 | 151 |
| Cricetidae | <i>Akodon amoenus</i>            | 34 | 32 | 151 |
| Cricetidae | <i>Akodon azare</i>              | 38 | 36 | 151 |
| Cricetidae | <i>Akodon berlespchii</i>        | 40 | 38 | 151 |
| Cricetidae | <i>Akodon boliviensis</i>        | 40 | 38 | 151 |
| Cricetidae | <i>Bolomys albiventer</i>        | 40 | 38 | 151 |
| Cricetidae | <i>Holochilus brasiliensis</i>   | 56 | 54 | 151 |
| Cricetidae | <i>Nectomys squamipes</i>        | 52 | 50 | 151 |
| Cricetidae | <i>Neotoma alleni</i>            | 48 | 52 | 151 |
| Cricetidae | <i>Oryzomys couesi</i>           | 56 | 54 | 151 |
| Cricetidae | <i>Oryzomys macconnelli</i>      | 64 | 62 | 151 |
| Cricetidae | <i>Oryzomys palustris</i>        | 56 | 54 | 151 |
| Cricetidae | <i>Phyllotis amicus</i>          | 38 | 72 | 151 |
| Cricetidae | <i>Phyllotis caprinus</i>        | 38 | 72 | 151 |
| Cricetidae | <i>Phyllotis gerbilus</i>        | 38 | 72 | 151 |
| Cricetidae | <i>Phyllotis haggardi</i>        | 38 | 72 | 151 |
| Cricetidae | <i>Reithrodontomys creper</i>    | 52 | 50 | 151 |
| Cricetidae | <i>Reithrodontomys gracilis</i>  | 52 | 50 | 151 |
| Cricetidae | <i>Reithrodontomys mexicanus</i> | 52 | 50 | 151 |
| Cricetidae | <i>Reithrodontomys montanus</i>  | 38 | 36 | 151 |
| Cricetidae | <i>Reithrodontomys humilis</i>   | 50 | 48 | 151 |
| Cricetidae | <i>Thomasomys aureus</i>         | 44 | 42 | 151 |
| Cricetidae | <i>Thomasomys kalinowski</i>     | 44 | 44 | 151 |
| Cricetidae | <i>Thomasomys monochromos</i>    | 42 | 42 | 151 |
| Cricetidae | <i>Thomasomys notatus</i>        | 44 | 44 | 151 |

|            |                                    |    |    |     |
|------------|------------------------------------|----|----|-----|
| Cricetidae | <i>Thomasomys taczanowski</i>      | 44 | 44 | 151 |
| Cricetidae | <i>Zygodontomys sp</i>             | 34 | 32 | 151 |
| Cricetidae | <i>Oryzomys delicatus</i>          | 60 | 78 | 154 |
| Cricetidae | <i>Neotoma goldmani</i>            | 52 | 54 | 163 |
| Cricetidae | <i>Nyctomys sumichrasti</i>        | 50 | 52 | 163 |
| Cricetidae | <i>Baiomys musculus</i>            | 48 | 66 | 163 |
| Cricetidae | <i>Akodon illuteus</i>             | 52 | 52 | 166 |
| Cricetidae | <i>Akodon longipilis</i>           | 52 | 52 | 166 |
| Cricetidae | <i>Akodon olivaceus</i>            | 52 | 52 | 166 |
| Cricetidae | <i>Akodon sanborni</i>             | 52 | 52 | 166 |
| Cricetidae | <i>Akodon serrensis</i>            | 44 | 42 | 166 |
| Cricetidae | <i>Akodon variussimulator</i>      | 42 | 40 | 166 |
| Cricetidae | <i>Akodon xanthorhinus</i>         | 52 | 52 | 166 |
| Cricetidae | <i>Oryzomys subflavus</i>          | 50 | 56 | 169 |
| Cricetidae | <i>Holochilus brasiliensis</i>     | 48 | 56 | 192 |
| Cricetidae | <i>Holochilus vulpinus</i>         | 36 | 56 | 192 |
| Cricetidae | <i>Peromyscus banderamus</i>       | 48 | 52 | 201 |
| Cricetidae | <i>Tylomys nudicaudus</i>          | 42 | 60 | 210 |
| Cricetidae | <i>Tylomys nudicaudus villae</i>   | 36 | 60 | 210 |
| Cricetidae | <i>Tylomys panamensis</i>          | 52 | 56 | 210 |
| Cricetidae | <i>Mesocritus newtoni</i>          | 38 | 72 | 215 |
| Cricetidae | <i>Akodon urichi venezeulensis</i> | 18 | 32 | 225 |
| Cricetidae | <i>Reithrodontomys montanus</i>    | 38 | 72 | 229 |
| Cricetidae | <i>Scotinomys xerampelinus</i>     | 58 | 88 | 236 |
| Cricetidae | <i>Holochilus venezuelae</i>       | 44 | 56 | 249 |
| Cricetidae | <i>Deltamys kempii</i>             | 38 | 36 | 250 |
| Cricetidae | <i>Phodopus roborovskii</i>        | 34 | 56 | 252 |
| Cricetidae | <i>Phodopus sungorus</i>           | 28 | 48 | 252 |

|                 |                               |    |    |     |
|-----------------|-------------------------------|----|----|-----|
| Cricetidae      | <i>Ichtyomys pittieri</i>     | 92 | 98 | 253 |
| Cricetidae      | <i>Neotomodon alstoni</i>     | 48 | 62 | 273 |
| Cricetidae      | <i>Phyllotis darwini</i>      | 38 | 72 | 283 |
| Cricetidae      | <i>Phyllotis magister</i>     | 38 | 72 | 283 |
| Cricetidae      | <i>Phyllotis osgoodi</i>      | 40 | 72 | 283 |
| Cricetidae      | <i>Aulyscomys boliviensis</i> | 22 | 30 | 284 |
| Cricetidae      | <i>Aulyscomys micropus</i>    | 34 | 34 | 284 |
| Cricetidae      | <i>Aulyscomys sublimis</i>    | 28 | 30 | 284 |
| Cricetidae      | <i>Lagurus curtatus</i>       | 54 | 54 | 297 |
| Cricetidae      | <i>Lagurus lagurus</i>        | 54 | 60 | 297 |
| Cricetidae      | <i>Mesocritus brandti</i>     | 42 | 80 | 297 |
| Cricetidae      | <i>Neotoma cinerea</i>        | 54 | 60 | 297 |
| Cricetidae      | <i>Akodon cursor</i>          | 24 | 42 | 319 |
| Cricetidae      | <i>Mesocritus auratus</i>     | 44 | 74 | 320 |
| Ctenodactylidae | <i>Pectinator spekei</i>      | 40 | 76 | 37  |
| Ctenodactylidae | <i>Massoutiera mzabi</i>      | 36 | 68 | 37  |
| Ctenodactylidae | <i>Ctenodactylus gundi</i>    | 40 | 76 | 37  |
| Ctenodactylidae | <i>Ctenodactylus vali</i>     | 40 | 76 | 37  |
| Ctenomyidae     | <i>Ctenomys talarum</i>       | 48 | 86 | 155 |
| Ctenomyidae     | <i>Ctenomys australis</i>     | 48 | 76 | 181 |
| Ctenomyidae     | <i>Ctenomys mendocinus</i>    | 48 | 76 | 182 |
| Ctenomyidae     | <i>Ctenomys argentinus</i>    | 44 | 50 | 209 |
| Ctenomyidae     | <i>Ctenomys conoveris</i>     | 50 | 52 | 209 |
| Ctenomyidae     | <i>Ctenomys perrensi</i>      | 50 | 80 | 209 |
| Ctenomyidae     | <i>Ctenomys dorbignyi</i>     | 70 | 80 | 209 |
| Ctenomyidae     | <i>Ctenomys roigi</i>         | 48 | 76 | 209 |
| Ctenomyidae     | <i>Ctenomys yolandae</i>      | 50 | 76 | 209 |
| Ctenomyidae     | <i>Ctenomys latro</i>         | 42 | 50 | 223 |

|                |                                     |    |    |     |
|----------------|-------------------------------------|----|----|-----|
| Ctenomyidae    | <i>Ctenomys occultus</i>            | 22 | 40 | 223 |
| Ctenomyidae    | <i>Ctenomys tucumanus</i>           | 28 | 52 | 223 |
| Ctenomyidae    | <i>Ctenomys rionigrensis</i>        | 50 | 70 | 308 |
| Ctenomyidae    | <i>Ctenomys maulinus</i>            | 26 | 46 | 309 |
| Ctenomyidae    | <i>Ctenomys robustus</i>            | 26 | 48 | 309 |
| Ctenomyidae    | <i>Ctenomys magellanicus</i>        | 34 | 64 | 309 |
| Ctenomyidae    | <i>Ctenomys opimus</i>              | 26 | 48 | 309 |
| Ctenomyidae    | <i>Ctenomys fulvus</i>              | 26 | 48 | 309 |
| Cynocephalidae | <i>Cynocephalus volans</i>          | 38 | 36 | 38  |
| Dasyuridae     | <i>Dasyercus cristicaudata</i>      | 14 | 24 | 175 |
| Dasyuridae     | <i>Ningai sp.</i>                   | 14 | 24 | 235 |
| Daubentoniidae | <i>Daubentonia madagascariensis</i> | 30 | 52 | 270 |
| Delphinidae    | <i>Globicephala melaena</i>         | 44 | 76 | 3   |
| Delphinidae    | <i>Globicephala macrorhyncha</i>    | 44 | 76 | 9   |
| Delphinidae    | <i>Stenella dubia</i>               | 44 | 76 | 10  |
| Delphinidae    | <i>Tursiops gilli</i>               | 44 | 76 | 10  |
| Delphinidae    | <i>Delphinus delphis</i>            | 44 | 76 | 10  |
| Delphinidae    | <i>Lagenorhynchus albirostris</i>   | 44 | 76 | 10  |
| Delphinidae    | <i>Orcinus orca</i>                 | 44 | 82 | 10  |
| Delphinidae    | <i>Globicephala scammonii</i>       | 44 | 76 | 10  |
| Delphinidae    | <i>Stenella clymene</i>             | 44 | 76 | 11  |
| Delphinidae    | <i>Lagenorhynchus obliquidens</i>   | 44 | 76 | 82  |
| Delphinidae    | <i>Stenella attenuatta</i>          | 44 | 76 | 267 |
| Delphinidae    | <i>Stenella longirostris</i>        | 44 | 76 | 267 |
| Delphinidae    | <i>Tursiops truncatus</i>           | 44 | 76 | 282 |
| Didelphidae    | <i>Philander archeri</i>            | 16 | 28 | 175 |
| Didelphidae    | <i>Didelphys azarae</i>             | 22 | 20 | 224 |
| Didelphidae    | <i>Didelphys albiventris</i>        | 22 | 20 | 226 |

|             |                                     |    |     |     |
|-------------|-------------------------------------|----|-----|-----|
| Didelphidae | <i>Caluromys derbianus</i>          | 14 | 24  | 226 |
| Didelphidae | <i>Caluromys lanatus</i>            | 14 | 24  | 226 |
| Didelphidae | <i>Caluromys philander</i>          | 14 | 24  | 226 |
| Didelphidae | <i>Chironectes minimus</i>          | 22 | 20  | 226 |
| Didelphidae | <i>Dromiciops australis</i>         | 14 | 24  | 226 |
| Didelphidae | <i>Lutreolina crassicaudata</i>     | 22 | 20  | 226 |
| Didelphidae | <i>Marmosa alstoni</i>              | 14 | 24  | 226 |
| Didelphidae | <i>Marmosa cinerea</i>              | 14 | 24  | 226 |
| Didelphidae | <i>Marmosa elegans</i>              | 14 | 22  | 226 |
| Didelphidae | <i>Marmosa fuscata</i>              | 14 | 24  | 226 |
| Didelphidae | <i>Marmosa mexicana</i>             | 14 | 24  | 226 |
| Didelphidae | <i>Marmosa murina</i>               | 14 | 24  | 226 |
| Didelphidae | <i>Marmosa pusilla</i>              | 14 | 24  | 226 |
| Didelphidae | <i>Marmosa robinsoni</i>            | 14 | 24  | 226 |
| Didelphidae | <i>Metachirus nudicaudatus</i>      | 14 | 24  | 226 |
| Didelphidae | <i>Monodelphis breviceuda</i>       | 18 | 30  | 226 |
| Didelphidae | <i>Monodelphis dimitiata</i>        | 18 | 30  | 226 |
| Didelphidae | <i>Momodelphis orinoci</i>          | 18 | 30  | 226 |
| Didelphidae | <i>Philander mchennyi</i>           | 22 | 20  | 226 |
| Didelphidae | <i>Didelphys virginiana</i>         | 22 | 32  | 259 |
| Didelphidae | <i>Didelphys marsupialis</i>        | 22 | 20  | 269 |
| Didelphidae | <i>Marmosops incanus</i>            | 14 | 24  | 269 |
| Didelphidae | <i>Momodelphis domestica</i>        | 18 | 20  | 269 |
| Didelphidae | <i>Philander opossum</i>            | 22 | 20  | 269 |
| Didelphidae | <i>Micoureus cinereus</i>           | 14 | 24  | 269 |
| Dinomyidae  | <i>Dinomys branickii</i>            | 58 | 100 | 43  |
| Echimyidae  | <i>Proechymis (guairae) Barina</i>  | 62 | 70  | 57  |
| Echimyidae  | <i>Proechimys (guairae) guairae</i> | 46 | 68  | 57  |

|                |                                      |    |    |     |
|----------------|--------------------------------------|----|----|-----|
| Echimyidae     | <i>Proechymis (guairae) Llano</i>    | 50 | 68 | 57  |
| Echimyidae     | <i>Proechimys (guairae) Miranda</i>  | 48 | 68 | 57  |
| Echimyidae     | <i>Proechimys (guairae) ochraeus</i> | 44 | 68 | 57  |
| Echimyidae     | <i>Proechimys (guairae) poliopus</i> | 42 | 70 | 57  |
| Echimyidae     | <i>Trichomys aperioides</i>          | 30 | 54 | 261 |
| Elephantidae   | <i>Elephas maximus</i>               | 56 | 62 | 147 |
| Elephantidae   | <i>Loxodonta africana</i>            | 56 | 60 | 147 |
| Emballonuridae | <i>Taphozous longimanus</i>          | 42 | 64 | 310 |
| Emballonuridae | <i>Taphozous melanopogom</i>         | 42 | 62 | 310 |
| Emballonuridae | <i>Taphozous nudiventris</i>         | 42 | 64 | 310 |
| Emballonuridae | <i>Taphozous saccolaimus</i>         | 44 | 64 | 310 |
| Equidae        | <i>Equus africanus somaliensis</i>   | 64 | 96 | 139 |
| Equidae        | <i>Equus hemionus kulan</i>          | 54 | 90 | 245 |
| Equidae        | <i>Equus kiang holdereri</i>         | 52 | 92 | 246 |
| Equidae        | <i>Equus ferus</i>                   | 66 | 88 | 247 |
| Equidae        | <i>Equus ferus caballus</i>          | 64 | 88 | 247 |
| Equidae        | <i>Equus africanus asinus</i>        | 62 | 98 | 247 |
| Equidae        | <i>Equus grevyi</i>                  | 46 | 76 | 247 |
| Equidae        | <i>Equus zebra</i>                   | 32 | 58 | 247 |
| Equidae        | <i>Equus quagga boehmi</i>           | 44 | 76 | 247 |
| Equidae        | <i>Equus hemionus onager</i>         | 56 | 98 | 247 |
| Erinaceidae    | <i>Paraechinus aethiopicus</i>       | 48 | 92 | 36  |
| Erinaceidae    | <i>Erinaceus europaeus</i>           | 48 | 88 | 68  |
| Erinaceidae    | <i>Erinaceus algirus</i>             | 48 | 90 | 125 |
| Erinaceidae    | <i>Atelerix albiventris</i>          | 48 | 92 | 143 |
| Erinaceidae    | <i>Erinaceus roumanicus/concolor</i> | 48 | 88 | 170 |
| Erinaceidae    | <i>Hemiechinus auritus</i>           | 48 | 92 | 228 |
| Erinaceidae    | <i>Hemiechinus dauuricus</i>         | 48 | 92 | 228 |

|                |                              |    |    |     |
|----------------|------------------------------|----|----|-----|
| Eschrichtiidae | <i>Eschrichtius gibbosus</i> | 44 | 76 | 10  |
| Felidae        | <i>Felis colocolo</i>        | 36 | 68 | 298 |
| Felidae        | <i>Felis ornata</i>          | 38 | 68 | 298 |
| Felidae        | <i>Felis caracal</i>         | 38 | 68 | 299 |
| Felidae        | <i>Felis bengalensis</i>     | 38 | 70 | 299 |
| Felidae        | <i>Felis chaus</i>           | 38 | 68 | 299 |
| Felidae        | <i>Felis pajeros</i>         | 36 | 68 | 299 |
| Felidae        | <i>Felis temmincki</i>       | 38 | 68 | 299 |
| Felidae        | <i>Felis viverrina</i>       | 38 | 70 | 299 |
| Felidae        | <i>Felis yagouaroundi</i>    | 38 | 72 | 299 |
| Felidae        | <i>Panthera leo</i>          | 38 | 68 | 299 |
| Felidae        | <i>Panthera onca</i>         | 38 | 68 | 299 |
| Felidae        | <i>Felis concolor</i>        | 38 | 70 | 300 |
| Felidae        | <i>Felis margarita</i>       | 38 | 68 | 300 |
| Felidae        | <i>Felis pardalis</i>        | 36 | 68 | 300 |
| Felidae        | <i>Felis aurata</i>          | 38 | 68 | 301 |
| Felidae        | <i>Felis catus</i>           | 38 | 68 | 301 |
| Felidae        | <i>Felis geoffroyi</i>       | 36 | 68 | 301 |
| Felidae        | <i>Felis libyca</i>          | 38 | 68 | 301 |
| Felidae        | <i>Felis linx</i>            | 38 | 68 | 301 |
| Felidae        | <i>Felis mamul</i>           | 38 | 70 | 301 |
| Felidae        | <i>Felis marmorata</i>       | 38 | 68 | 301 |
| Felidae        | <i>Felis nigripes</i>        | 38 | 68 | 301 |
| Felidae        | <i>Felis planiceps</i>       | 38 | 70 | 301 |
| Felidae        | <i>Felis rubiginosa</i>      | 38 | 70 | 301 |
| Felidae        | <i>Felis rufa</i>            | 38 | 68 | 301 |
| Felidae        | <i>Felis serval</i>          | 38 | 68 | 301 |
| Felidae        | <i>Felis sylvestris</i>      | 38 | 68 | 301 |

|             |                                 |    |     |     |
|-------------|---------------------------------|----|-----|-----|
| Felidae     | <i>Felix tigrina</i>            | 36 | 68  | 301 |
| Felidae     | <i>Felis wiedi</i>              | 36 | 68  | 301 |
| Felidae     | <i>Panthera pardus</i>          | 38 | 68  | 301 |
| Felidae     | <i>Panthera tigris</i>          | 38 | 68  | 301 |
| Felidae     | <i>Panthera uncia</i>           | 38 | 68  | 301 |
| Felidae     | <i>Acinonyx jubatus</i>         | 38 | 70  | 301 |
| Felidae     | <i>Neofelis nebulosa</i>        | 38 | 68  | 301 |
| Felidae     | <i>Felis iriomotensis</i>       | 38 | 70  | 302 |
| Geomydae    | <i>Geomys personatus</i>        | 70 | 70  | 77  |
| Geomydae    | <i>Geomys arenarius</i>         | 70 | 102 | 77  |
| Geomydae    | <i>Geomys bursarius</i>         | 72 | 70  | 151 |
| Geomydae    | <i>Geomys tropicalis</i>        | 38 | 72  | 151 |
| Geomydae    | <i>Pappogeomys merriami</i>     | 36 | 66  | 160 |
| Geomydae    | <i>Thomomys monticola</i>       | 40 | 64  | 214 |
| Geomydae    | <i>Thomomys talpoides</i>       | 48 | 84  | 214 |
| Geomydae    | <i>Thomomys umbrius</i>         | 78 | 96  | 214 |
| Geomydae    | <i>Geomys pinetis</i>           | 42 | 80  | 293 |
| Giraffidae  | <i>Giraffa camelopardis</i>     | 30 | 54  | 110 |
| Gliridae    | <i>Eliomys quercinus</i>        | 48 | 90  | 15  |
| Gliridae    | <i>Muscardinus avellanarius</i> | 46 | 88  | 131 |
| Gliridae    | <i>Myoxus glis</i>              | 62 | 120 | 131 |
| Gliridae    | <i>Dryomys nitedula</i>         | 48 | 92  | 131 |
| Gliridae    | <i>Myomimus personatus</i>      | 44 | 84  | 131 |
| Herpestidae | <i>Galidia elegans</i>          | 44 | 84  | 311 |
| Herpestidae | <i>Bdeogale sp</i>              | 36 | 68  | 311 |
| Herpestidae | <i>Atilax paludinosus</i>       | 36 | 68  | 311 |
| Herpestidae | <i>Helogale parvula</i>         | 36 | 68  | 312 |
| Herpestidae | <i>Herpestes javanicus</i>      | 36 | 68  | 313 |



|              |                                   |    |     |     |
|--------------|-----------------------------------|----|-----|-----|
| Herpestidae  | <i>Cryptoprocta ferox</i>         | 42 | 80  | 314 |
| Heteromyidae | <i>Dipodomys deserti</i>          | 64 | 108 | 133 |
| Heteromyidae | <i>Dipodomys elator</i>           | 72 | 82  | 133 |
| Heteromyidae | <i>Dipodomys elephantinus</i>     | 60 | 116 | 133 |
| Heteromyidae | <i>Dipodomys graviceps</i>        | 70 | 70  | 133 |
| Heteromyidae | <i>Dipodomys heermanni</i>        | 52 | 96  | 133 |
| Heteromyidae | <i>Dipodomys ingens</i>           | 64 | 98  | 133 |
| Heteromyidae | <i>Dipodomys merriami</i>         | 52 | 100 | 133 |
| Heteromyidae | <i>Dipodomys microps</i>          | 60 | 116 | 133 |
| Heteromyidae | <i>Dipodomys nelsoni</i>          | 72 | 134 | 133 |
| Heteromyidae | <i>Dipodomys nitratoides</i>      | 54 | 104 | 133 |
| Heteromyidae | <i>Dipodomys ordii largus</i>     | 74 | 144 | 133 |
| Heteromyidae | <i>Dipodomys ornatus</i>          | 72 | 138 | 133 |
| Heteromyidae | <i>Dipodomys panamintinus</i>     | 64 | 96  | 133 |
| Heteromyidae | <i>Dipodomys spectabilis</i>      | 72 | 70  | 133 |
| Heteromyidae | <i>Dipodomys stephensi</i>        | 70 | 86  | 133 |
| Heteromyidae | <i>Dipodomys venustus</i>         | 60 | 116 | 133 |
| Heteromyidae | <i>Dipodomys agilis</i>           | 60 | 116 | 151 |
| Heteromyidae | <i>Microdipodops pallidus</i>     | 42 | 80  | 151 |
| Heteromyidae | <i>Microdipodops megacephalus</i> | 40 | 72  | 151 |
| Heteromyidae | <i>Perognatus apache</i>          | 44 | 46  | 151 |
| Heteromyidae | <i>Heteromys demarestianus</i>    | 60 | 86  | 180 |
| Heteromyidae | <i>Heteromys oresteus</i>         | 60 | 78  | 180 |
| Heteromyidae | <i>Liomys salvini</i>             | 56 | 88  | 180 |
| Heteromyidae | <i>Perognatus penicillatus</i>    | 46 | 48  | 212 |
| Heteromyidae | <i>Perognatus intermedius</i>     | 46 | 58  | 212 |
| Heteromyidae | <i>Perognatus artus</i>           | 54 | 56  | 212 |
| Heteromyidae | <i>Perognatus goldmani</i>        | 52 | 56  | 212 |

|                |                                        |    |    |     |
|----------------|----------------------------------------|----|----|-----|
| Heteromyidae   | <i>Perognatus pernix</i>               | 38 | 56 | 212 |
| Heteromyidae   | <i>Perognatus baileyi</i>              | 48 | 60 | 212 |
| Heteromyidae   | <i>Perognatus hispidus</i>             | 34 | 62 | 212 |
| Heteromyidae   | <i>Perognatus longimembris</i>         | 56 | 88 | 292 |
| Heteromyidae   | <i>Perognatus amplus</i>               | 56 | 94 | 292 |
| Heteromyidae   | <i>Perognatus inornatus</i>            | 56 | 88 | 292 |
| Heteromyidae   | <i>Perognatus parvus</i>               | 54 | 68 | 292 |
| Heteromyidae   | <i>Perognatus alticola</i>             | 54 | 74 | 292 |
| Heteromyidae   | <i>Perognatus fasciatus</i>            | 44 | 48 | 292 |
| Heteromyidae   | <i>Perognatus flavescens</i>           | 44 | 48 | 292 |
| Heteromyidae   | <i>Perognatus flavus</i>               | 50 | 86 | 292 |
| Heteromyidae   | <i>Perognatus formosus</i>             | 36 | 52 | 292 |
| Heteromyidae   | <i>Perognatus merriami</i>             | 50 | 86 | 292 |
| Heteromyidae   | <i>Perognatus xanthonatus</i>          | 54 | 76 | 292 |
| Hippopotamidae | <i>Hippopotamus amphibius</i>          | 36 | 68 | 45  |
| Hipposideridae | <i>Coelops frithi formosanus</i>       | 30 | 56 | 5   |
| Hipposideridae | <i>Hipposideros armiger terasensis</i> | 32 | 60 | 5   |
| Hipposideridae | <i>Hipposideros turpis</i>             | 32 | 60 | 5   |
| Hipposideridae | <i>Aselliscus stoliczkanus</i>         | 30 | 56 | 130 |
| Hipposideridae | <i>Hipposideros ater</i>               | 32 | 60 | 262 |
| Hipposideridae | <i>Hipposideros cineraceus</i>         | 32 | 60 | 262 |
| Hipposideridae | <i>Hipposideros fulvus</i>             | 32 | 60 | 262 |
| Hipposideridae | <i>Hipposideros landakadiva</i>        | 32 | 60 | 262 |
| Hipposideridae | <i>Hipposideros pomona</i>             | 32 | 60 | 262 |
| Hipposideridae | <i>Hipposideros speoris</i>            | 32 | 60 | 262 |
| Hominidae      | <i>Pan paniscus</i>                    | 48 | 82 | 47  |
| Hominidae      | <i>Gorilla gorilla</i>                 | 48 | 86 | 306 |
| Hominidae      | <i>Homo sapiens</i>                    | 46 | 78 | 306 |

|             |                                   |    |    |     |
|-------------|-----------------------------------|----|----|-----|
| Hominidae   | <i>Pan troglodytes</i>            | 48 | 82 | 306 |
| Hominidae   | <i>Pongo pygmaeus</i>             | 48 | 76 | 306 |
| Hyaenidae   | <i>Lycaon pictus</i>              | 38 | 64 | 132 |
| Hyaenidae   | <i>Hyaena brunnea</i>             | 40 | 66 | 298 |
| Hyaenidae   | <i>Crocuta crocuta</i>            | 40 | 70 | 301 |
| Hylobatidae | <i>Hylobates concolor</i>         | 52 | 94 | 87  |
| Hylobatidae | <i>Hylobates lar</i>              | 44 | 82 | 87  |
| Hylobatidae | <i>Symphalangus syndactylus</i>   | 50 | 94 | 157 |
| Hylobatidae | <i>Hylobates hoolock</i>          | 38 | 72 | 216 |
| Hylobatidae | <i>Hylobates agilis</i>           | 44 | 82 | 264 |
| Hylobatidae | <i>Hylobates klossii</i>          | 44 | 82 | 264 |
| Hylobatidae | <i>Hylobates moloch</i>           | 44 | 82 | 264 |
| Hylobatidae | <i>Hylobates pileatus</i>         | 44 | 82 | 264 |
| Indridae    | <i>Avahi laniger</i>              | 70 | 74 | 241 |
| Indridae    | <i>Propithecus verreauxi</i>      | 48 | 76 | 241 |
| Indridae    | <i>Propithecus diadema</i>        | 44 | 74 | 258 |
| Indridae    | <i>Propithecus tattersalli</i>    | 42 | 72 | 258 |
| Lemuridae   | <i>Lemur fulvus albifrons</i>     | 60 | 62 | 129 |
| Lemuridae   | <i>Hapalemur griseus occ</i>      | 58 | 64 | 201 |
| Lemuridae   | <i>Hapalemur griseus grisseus</i> | 54 | 62 | 201 |
| Lemuridae   | <i>Lemur fulvus colaris</i>       | 52 | 62 | 238 |
| Lemuridae   | <i>Lemur fulvus albocollaris</i>  | 48 | 62 | 238 |
| Lemuridae   | <i>Lemur fulvus fulvus</i>        | 60 | 62 | 238 |
| Lemuridae   | <i>Lemur mongoz</i>               | 60 | 62 | 238 |
| Lemuridae   | <i>Lemur macaco</i>               | 44 | 62 | 238 |
| Lemuridae   | <i>Hapalemur simus</i>            | 60 | 64 | 239 |
| Lemuridae   | <i>Lemur catta</i>                | 56 | 58 | 239 |
| Lemuridae   | <i>Eulemur coronatus</i>          | 46 | 62 | 240 |

|              |                                      |    |     |     |
|--------------|--------------------------------------|----|-----|-----|
| Lemuridae    | <i>Varecia variegata</i>             | 46 | 62  | 240 |
| Leporidae    | <i>Sylvilagus floridanus</i>         | 42 | 74  | 137 |
| Leporidae    | <i>Oryctolagus cuniculus</i>         | 44 | 76  | 205 |
| Leporidae    | <i>Lepus saxatilis</i>               | 48 | 78  | 230 |
| Leporidae    | <i>Sylvilagus aquaticus</i>          | 38 | 64  | 232 |
| Leporidae    | <i>Sylvilagus transitionalis</i>     | 52 | 94  | 232 |
| Leporidae    | <i>Sylvilagus palustris</i>          | 38 | 64  | 233 |
| Leporidae    | <i>Sylvilagus idahoensis</i>         | 44 | 76  | 254 |
| Leporidae    | <i>Sylvilagus bachmani</i>           | 48 | 78  | 266 |
| Leporidae    | <i>Lepus americanus</i>              | 48 | 78  | 266 |
| Lorisidae    | <i>Arctocebus calabarensis</i>       | 52 | 100 | 46  |
| Lorisidae    | <i>Perodictis potto</i>              | 62 | 106 | 46  |
| Lorisidae    | <i>Nycticebus coucang</i>            | 50 | 96  | 157 |
| Lorisidae    | <i>Loris tardigradus</i>             | 62 | 90  | 244 |
| Lorisidae    | <i>Nycticebus pygmaeus</i>           | 50 | 96  | 287 |
| Macropodidae | <i>Macropus parma</i>                | 16 | 28  | 43  |
| Macropodidae | <i>Petrogale xanthopus</i>           | 22 |     | 47  |
| Macropodidae | <i>Petrogale brachyotis</i>          | 20 |     | 49  |
| Macropodidae | <i>Petrogale concinna</i>            |    |     | 49  |
| Macropodidae | <i>Petrogale mareeba</i>             | 18 | 18  | 98  |
| Macropodidae | <i>Petrogale penicillata</i>         | 22 | 20  | 98  |
| Macropodidae | <i>Petrogale persephone</i>          | 22 | 26  | 99  |
| Macropodidae | <i>Petrogale lateralis lateralis</i> | 22 | 26  | 99  |
| Macropodidae | <i>Petrogale rothschildi</i>         | 22 | 26  | 99  |
| Macropodidae | <i>Thylogale billardieri</i>         | 22 | 26  | 99  |
| Macropodidae | <i>Thylogale thetis</i>              | 22 | 26  | 99  |
| Macropodidae | <i>Thylogale stigmata</i>            | 22 | 26  | 99  |
| Macropodidae | <i>Macropus eugenii</i>              | 16 | 28  | 131 |

|                   |                                     |    |     |     |
|-------------------|-------------------------------------|----|-----|-----|
| Macropodidae      | <i>Wallabia bicolor</i>             | 10 | 8   | 161 |
| Macropodidae      | <i>Macropus rufogriseus</i>         | 16 | 28  | 161 |
| Macropodidae      | <i>Macropus parryi</i>              | 16 | 28  | 161 |
| Macropodidae      | <i>Macropus giganteus</i>           | 16 | 28  | 161 |
| Macropodidae      | <i>Macropus fuliginosus</i>         | 16 | 28  | 161 |
| Macropodidae      | <i>Macropus robustus</i>            | 16 | 28  | 161 |
| Macropodidae      | <i>Macropus rufus</i>               | 20 | 36  | 161 |
| Macropodidae      | <i>Petrogale lateralis pearsoni</i> | 22 | 26  | 289 |
| Macropodidae      | <i>Petrogale xanthopus</i>          | 22 | 26  | 289 |
| Macroscelididae   | <i>Macroscelides proboscideus</i>   | 28 | 48  | 228 |
| Manidae           | <i>Manis pentadactyla</i>           | 36 | 66  | 222 |
| Megadermatidae    | <i>Megaderma spasma</i>             | 38 | 58  | 85  |
| Megadermatidae    | <i>Megaderma lyra</i>               | 54 | 104 | 91  |
| Megalonychidae    | <i>Choloepus sp</i>                 | 53 | 66  | 23  |
| Megalonychidae    | <i>Choloepus hoffmanni</i>          | 49 | 66  | 76  |
| Microbiotheriidae | <i>Dromiciops australis</i>         | 14 | 24  | 7   |
| Molossidae        | <i>Molossops temminckii</i>         | 48 | 70  | 189 |
| Molossidae        | <i>Nyctinomops laticaudatus</i>     | 48 | 64  | 189 |
| Molossidae        | <i>Eumops auripendulus</i>          | 42 | 62  | 285 |
| Molossidae        | <i>Eumops glaucinus</i>             | 38 | 64  | 285 |
| Molossidae        | <i>Eumops perotis</i>               | 48 | 56  | 285 |
| Molossidae        | <i>Eumops underwoodi</i>            | 48 | 56  | 285 |
| Molossidae        | <i>Molossops abrasus</i>            | 34 | 60  | 285 |
| Molossidae        | <i>Molossops greenhalii</i>         | 34 | 60  | 285 |
| Molossidae        | <i>Molossus ater</i>                | 48 | 58  | 285 |
| Molossidae        | <i>Molossus molossus</i>            | 48 | 58  | 285 |
| Molossidae        | <i>Molossus sinaloe</i>             | 48 | 58  | 285 |
| Molossidae        | <i>Otomops martienssi</i>           | 48 | 58  | 285 |

|              |                               |    |     |     |
|--------------|-------------------------------|----|-----|-----|
| Molossidae   | <i>Platymops setiger</i>      | 48 | 54  | 285 |
| Molossidae   | <i>Promops centralis</i>      | 48 | 58  | 285 |
| Molossidae   | <i>Promops davisoni</i>       | 48 | 58  | 285 |
| Molossidae   | <i>Tadarida aurispinosa</i>   | 48 | 58  | 285 |
| Molossidae   | <i>Tadarida brasiliensis</i>  | 48 | 56  | 285 |
| Molossidae   | <i>Tadarida formosrosassa</i> | 48 | 58  | 285 |
| Molossidae   | <i>Tadarida kalinowskii</i>   | 48 | 56  | 285 |
| Molossidae   | <i>Tadarida laticaudata</i>   | 48 | 58  | 285 |
| Molossidae   | <i>Tadarida macrotis</i>      | 48 | 58  | 285 |
| Monodontidae | <i>Monodon monoceros</i>      | 44 | 78  | 6   |
| Monodontidae | <i>Delphinapterus leucas</i>  | 44 | 76  | 150 |
| Mormoopidae  | <i>Mormoops blainvilli</i>    | 38 | 60  | 260 |
| Mormoopidae  | <i>Mormoops megalophyla</i>   | 38 | 60  | 260 |
| Mormoopidae  | <i>Pteronotus davyi</i>       | 38 | 60  | 260 |
| Mormoopidae  | <i>Pteronotus gymnonotus</i>  | 38 | 60  | 260 |
| Mormoopidae  | <i>Pteronotus macleayii</i>   | 38 | 60  | 260 |
| Mormoopidae  | <i>Pteronotus parnelii</i>    | 38 | 60  | 260 |
| Mormoopidae  | <i>Pteronotus personatus</i>  | 38 | 60  | 260 |
| Mormoopidae  | <i>Pteronotus quadridens</i>  | 38 | 60  | 260 |
| Moschidae    | <i>Moschus moschiferus</i>    | 58 | 112 | 43  |
| Muridae      | <i>Acomys dimidiatus</i>      | 38 | 68  | 2   |
| Muridae      | <i>Conilurus penicillatus</i> | 48 | 50  | 26  |
| Muridae      | <i>Hydromys chrysogaster</i>  | 48 | 50  | 26  |
| Muridae      | <i>Leporillus conditor</i>    | 46 | 52  | 26  |
| Muridae      | <i>Mastacomys fuscus</i>      | 48 | 56  | 26  |
| Muridae      | <i>Melomys littoralis</i>     | 48 | 50  | 26  |
| Muridae      | <i>Melomys cervinipes</i>     | 48 | 52  | 26  |
| Muridae      | <i>Mesembriomus gouldii</i>   | 48 | 50  | 26  |

|         |                                  |    |    |    |
|---------|----------------------------------|----|----|----|
| Muridae | <i>Notomys alexis</i>            | 48 | 50 | 26 |
| Muridae | <i>Notomys cervinus</i>          | 48 | 76 | 26 |
| Muridae | <i>Notomys fuscus</i>            | 48 | 48 | 26 |
| Muridae | <i>Notomys mitchellii</i>        | 48 | 54 | 26 |
| Muridae | <i>Pseudomys albocinereus</i>    | 48 | 50 | 26 |
| Muridae | <i>Pseudomys australis</i>       | 48 | 54 | 26 |
| Muridae | <i>Pseudomys delicatius</i>      | 48 | 52 | 26 |
| Muridae | <i>Pseudomys desertor</i>        | 48 | 50 | 26 |
| Muridae | <i>Pseudomys fumeus</i>          | 48 | 50 | 26 |
| Muridae | <i>Pseudomys gracilicaudatus</i> | 48 | 56 | 26 |
| Muridae | <i>Pseudomys higginsi</i>        | 48 | 52 | 26 |
| Muridae | <i>Pseudomys nanus</i>           | 48 | 50 | 26 |
| Muridae | <i>Pseudomys novaehollandiae</i> | 48 | 52 | 26 |
| Muridae | <i>Pseudomys occidentalis</i>    | 48 | 52 | 26 |
| Muridae | <i>Pseudomys praeconis</i>       | 48 | 50 | 26 |
| Muridae | <i>Pseudomys shortridgei</i>     | 48 | 50 | 26 |
| Muridae | <i>Uromys caudimaculatus</i>     | 46 | 50 | 26 |
| Muridae | <i>Zyzomys woodwardi</i>         | 44 | 46 | 26 |
| Muridae | <i>Zyzomys argurus</i>           | 44 | 46 | 26 |
| Muridae | <i>Xeromys myoides</i>           | 48 | 50 | 26 |
| Muridae | <i>Rattus fuscipes</i>           | 38 | 56 | 27 |
| Muridae | <i>Rattus leucopus</i>           | 34 | 56 | 27 |
| Muridae | <i>Rattus lutreolus</i>          | 42 | 56 | 27 |
| Muridae | <i>Rattus tunneyi</i>            | 42 | 58 | 27 |
| Muridae | <i>Rattus sordidus</i>           | 32 | 58 | 27 |
| Muridae | <i>Microtus guentheri</i>        | 54 | 52 | 29 |
| Muridae | <i>Microtus cabrerai</i>         | 54 | 60 | 60 |
| Muridae | <i>Microtus arvalis</i>          | 46 | 78 | 61 |

|         |                                   |    |    |     |
|---------|-----------------------------------|----|----|-----|
| Muridae | <i>Microtus nivalus</i>           | 54 | 52 | 61  |
| Muridae | <i>Eothenomys miletus</i>         | 56 | 54 | 65  |
| Muridae | <i>Microtus agrestis</i>          | 50 | 52 | 75  |
| Muridae | <i>Rattus rattus</i>              | 38 | 58 | 78  |
| Muridae | <i>Lemmyscomys rosalia</i>        | 48 | 62 | 81  |
| Muridae | <i>Rhabdomys pumilio</i>          | 46 | 60 | 81  |
| Muridae | <i>Microtus oeconomus</i>         | 30 | 56 | 106 |
| Muridae | <i>Microtus savii</i>             | 54 | 56 | 111 |
| Muridae | <i>Dasymys incomtus</i>           | 38 | 44 | 123 |
| Muridae | <i>Alticola argentatus</i>        | 56 | 58 | 134 |
| Muridae | <i>Alticola barakshin</i>         | 56 | 58 | 134 |
| Muridae | <i>Alticola semicanus</i>         | 56 | 60 | 134 |
| Muridae | <i>Alticola strelzovi</i>         | 56 | 58 | 134 |
| Muridae | <i>Rhizomys sumatrensis</i>       | 50 | 96 | 141 |
| Muridae | <i>Rattus natalensis</i>          | 36 | 56 | 142 |
| Muridae | <i>Arvicola terrestris</i>        | 36 | 68 | 151 |
| Muridae | <i>Apodemus flavicolis</i>        | 50 | 48 | 151 |
| Muridae | <i>Apodemus pensuli</i>           | 48 | 46 | 151 |
| Muridae | <i>Apodemus sylvaticus</i>        | 48 | 46 | 151 |
| Muridae | <i>Mus castaneus</i>              | 40 | 38 | 151 |
| Muridae | <i>Mus musculus</i>               | 40 | 38 | 151 |
| Muridae | <i>Mus spretus</i>                | 40 | 38 | 151 |
| Muridae | <i>Rattus norvegicus</i>          | 42 | 58 | 151 |
| Muridae | <i>Mus mattheyi</i>               | 36 | 34 | 152 |
| Muridae | <i>Mus minutoides/musculoides</i> | 34 | 32 | 152 |
| Muridae | <i>Mus obanguii</i>               | 28 | 32 | 152 |
| Muridae | <i>Mus setulosus</i>              | 36 | 34 | 152 |
| Muridae | <i>Phloeomys cumingi</i>          | 40 | 56 | 153 |



|         |                                    |    |    |     |
|---------|------------------------------------|----|----|-----|
| Muridae | <i>Microtus mexicanus</i>          | 48 | 58 | 163 |
| Muridae | <i>Ellobius lutescens</i>          | 18 | 32 | 184 |
| Muridae | <i>Leggadina hermannsburgensis</i> | 48 | 50 | 185 |
| Muridae | <i>Mus booduga</i>                 | 40 | 38 | 185 |
| Muridae | <i>Pitymys duodecimcostatus</i>    | 62 | 72 | 187 |
| Muridae | <i>Pitymys mariae</i>              | 62 | 70 | 187 |
| Muridae | <i>Pitymys pyrenaicus</i>          | 54 | 56 | 187 |
| Muridae | <i>Pitymys savii</i>               | 54 | 58 | 187 |
| Muridae | <i>Pitymys subterraneus</i>        | 52 | 54 | 187 |
| Muridae | <i>Pitymys multiplex</i>           | 48 | 50 | 187 |
| Muridae | <i>Pitymys linchensteini</i>       | 46 | 48 | 187 |
| Muridae | <i>Pitymys thomasi</i>             | 44 | 42 | 187 |
| Muridae | <i>Pitymys atticus</i>             | 44 | 44 | 187 |
| Muridae | <i>Pitymys tatricus</i>            | 32 | 44 | 187 |
| Muridae | <i>Microtus oregoni</i>            | 17 | 30 | 208 |
| Muridae | <i>Parotomys brantsii</i>          | 42 | 78 | 220 |
| Muridae | <i>Arvicola shermani exitus</i>    | 36 | 60 | 251 |
| Muridae | <i>Vandeleuria o. oleracea</i>     | 29 | 40 | 255 |
| Muridae | <i>Bandicota bengalensis</i>       | 42 | 56 | 256 |
| Muridae | <i>Mus dunni</i>                   | 40 | 38 | 257 |
| Muridae | <i>Acomys airensis</i>             | 42 | 66 | 276 |
| Muridae | <i>Hylomyscus stella</i>           | 46 | 68 | 276 |
| Muridae | <i>Malacomys longipes</i>          | 48 | 48 | 276 |
| Muridae | <i>Mastomys huberti</i>            | 32 | 44 | 276 |
| Muridae | <i>Myomys daltoni</i>              | 36 | 34 | 276 |
| Muridae | <i>Uranomys ruddi</i>              | 58 | 64 | 276 |
| Muridae | <i>Arvicanthis niloticus</i>       | 58 | 70 | 280 |
| Muridae | <i>Arvicanthis abyssinicus</i>     | 62 | 60 | 280 |

|                 |                                |     |     |     |
|-----------------|--------------------------------|-----|-----|-----|
| Mustelidae      | <i>Putorius furo</i>           | 40  | 66  | 24  |
| Mustelidae      | <i>Mustela frenata</i>         | 42  | 62  | 25  |
| Mustelidae      | <i>Mustela vison</i>           | 30  | 54  | 171 |
| Mustelidae      | <i>Mustela erminea</i>         | 44  | 76  | 172 |
| Mustelidae      | <i>Taxidea taxus</i>           | 32  | 48  | 298 |
| Mustelidae      | <i>Mustela nivalis</i>         | 42  | 66  | 299 |
| Mustelidae      | <i>Eira barbara</i>            | 38  | 68  | 301 |
| Mustelidae      | <i>Galictis vittata</i>        | 38  | 64  | 301 |
| Mustelidae      | <i>Mellivora capensis</i>      | 40  | 70  | 301 |
| Mustelidae      | <i>Melogale sp.</i>            | 38  | 62  | 301 |
| Myocastoridae   | <i>Myocastor coypus</i>        | 42  | 80  | 177 |
| Myrmecophagidae | <i>Cyclopes didactylus</i>     | 64  | 98  | 23  |
| Myrmecophagidae | <i>Myrmecophaga tridactyla</i> | 60  | 104 | 23  |
| Myrmecophagidae | <i>Tamandua tetradactyla</i>   | 54  | 104 | 23  |
| Mystacinidae    | <i>Mystacina tuberculata</i>   | 36  | 60  | 101 |
| Natalidae       | <i>Natalus major</i>           | 36  | 54  | 95  |
| Noctilionidae   | <i>Noctilio albiventris</i>    | 34  | 62  | 213 |
| Notoryctidae    | <i>Notoryctes typhlops</i>     | 20  | 36  | 113 |
| Ochotonidae     | <i>Ochotona Princeps</i>       | 68  | 72  | 266 |
| Ochotonidae     | <i>Ochotona princeps</i>       | 68  | 84  | 297 |
| Octodontidae    | <i>Tympanoctomys barrerae</i>  | 102 | 198 | 73  |
| Octodontidae    | <i>Aconaemys fuscus</i>        | 56  | 108 | 74  |
| Octodontidae    | <i>Aconaemys porteri</i>       | 58  | 112 | 74  |
| Octodontidae    | <i>Aconaemys sagei</i>         | 54  | 104 | 74  |
| Octodontidae    | <i>Octomys mimax</i>           | 56  | 108 | 74  |

|                   |                                 |       |     |     |
|-------------------|---------------------------------|-------|-----|-----|
| Octodontidae      | <i>Octodon bridgesi</i>         | 58    | 112 | 74  |
| Octodontidae      | <i>Octodon degus</i>            | 58    | 112 | 74  |
| Octodontidae      | <i>Octodontomys gliroides</i>   | 38    | 72  | 74  |
| Octodontidae      | <i>Spalacopus cyanus</i>        | 58    | 112 | 74  |
| Odobenidae        | <i>Odobenus rosmarus</i>        | 32    | 60  | 8   |
| Ornithorhynchidae | <i>Ornithorhynchus anatinus</i> | 54    | 104 | 321 |
| Orycteropidae     | <i>Orycteropus afer</i>         | 20    | 36  | 211 |
| Otaridae          | <i>Eumetopias jubata</i>        | 36    | 66  | 8   |
| Otaridae          | <i>Zapholus californianus</i>   | 36    | 66  | 8   |
| Otaridae          | <i>Callorhinus urinus</i>       | 36    | 68  | 102 |
| Pedetidae         | <i>Pedetes capensis</i>         | 38    | 68  | 124 |
| Peramelidae       | <i>Perameles nasuta</i>         | 14    | 24  | 175 |
| Peramelidae       | <i>Isodon macrurus</i>          | 14    | 24  | 175 |
| Peramelidae       | <i>Isodon obesulus</i>          | 14    | 24  | 175 |
| Peramelidae       | <i>Thyalocomys lagotis</i>      | 14    | 24  | 175 |
| Petauridae        | <i>Petaurus norfolcensis</i>    | 20/21 | 36  | 161 |
| Phalangeridae     | <i>Cercateus nanus</i>          | 14    | 24  | 175 |
| Phalangeridae     | <i>Lasiorhinus latifrons</i>    | 14    | 24  | 235 |
| Phascolarctidae   | <i>Phascolarctus cinereus</i>   | 14    | 24  | 175 |
| Phocidae          | <i>Cystophora cristata</i>      | 34    | 62  | 8   |
| Phocidae          | <i>Erignathus barbatus</i>      | 34    | 62  | 8   |
| Phocidae          | <i>Halichoerus grypus</i>       | 32    | 60  | 8   |
| Phocidae          | <i>Histiophoca fasciata</i>     | 32    | 60  | 8   |
| Phocidae          | <i>Leptonychotes weddelli</i>   | 34    | 62  | 8   |
| Phocidae          | <i>Miorunga leonina</i>         | 34    | 62  | 8   |
| Phocidae          | <i>Pagophilus groenlandicus</i> | 32    | 60  | 8   |
| Phocidae          | <i>Phoca vitulina</i>           | 32    | 60  | 8   |

|                  |                                      |    |    |     |
|------------------|--------------------------------------|----|----|-----|
| Phocidae         | <i>Pusa hispida</i>                  | 32 | 60 | 8   |
| Phocidae         | <i>Phoca hispida krascheninikovi</i> | 32 | 58 | 102 |
| Phocidae         | <i>Miorunga angustirostris</i>       | 34 | 62 | 231 |
| Phocoenidae      | <i>Phocoenoides dalli</i>            | 44 | 76 | 10  |
| Phocoenidae      | <i>Phocoena phocoena</i>             | 44 | 76 | 11  |
| Phyllostomatidae | <i>Mesophylla macconelli</i>         | 22 | 20 | 18  |
| Phyllostomatidae | <i>Artibeus cinereus</i>             | 30 | 56 | 19  |
| Phyllostomatidae | <i>Artibeus phaeotis</i>             | 30 | 56 | 19  |
| Phyllostomatidae | <i>Artibeus watsoni</i>              | 30 | 56 | 19  |
| Phyllostomatidae | <i>Brachyphylla nana</i>             | 32 | 60 | 19  |
| Phyllostomatidae | <i>Centurio senex</i>                | 28 | 52 | 19  |
| Phyllostomatidae | <i>Chiroderma villosum</i>           | 26 | 48 | 19  |
| Phyllostomatidae | <i>Demodus rotundus</i>              | 28 | 52 | 19  |
| Phyllostomatidae | <i>Diaemus youngii</i>               | 32 | 60 | 19  |
| Phyllostomatidae | <i>Dyphilla eucadata</i>             | 32 | 60 | 19  |
| Phyllostomatidae | <i>Erophylla sezekorni</i>           | 32 | 60 | 19  |
| Phyllostomatidae | <i>Glossophaga soricina</i>          | 32 | 60 | 19  |
| Phyllostomatidae | <i>Macrotus californicus</i>         | 40 | 60 | 19  |
| Phyllostomatidae | <i>Monophylus redmani</i>            | 32 | 60 | 19  |
| Phyllostomatidae | <i>Phyllonycteris aphylla</i>        | 32 | 60 | 19  |
| Phyllostomatidae | <i>Phyllostomus elongatus</i>        | 32 | 58 | 19  |
| Phyllostomatidae | <i>Sturnina erythromos</i>           | 30 | 56 | 19  |
| Phyllostomatidae | <i>Uroderma bilobatum</i>            | 44 | 48 | 19  |
| Phyllostomatidae | <i>Carollia subrufa</i>              | 20 | 36 | 20  |
| Phyllostomatidae | <i>Rhinophylla fischeriae</i>        | 34 | 56 | 20  |
| Phyllostomatidae | <i>Rhinophylla pumilio</i>           | 36 | 62 | 20  |
| Phyllostomatidae | <i>Artibeus jamaicensis</i>          | 30 | 52 | 21  |
| Phyllostomatidae | <i>Enchistemes harti</i>             | 30 | 50 | 21  |

|                  |                              |       |    |     |
|------------------|------------------------------|-------|----|-----|
| Phyllostomatidae | <i>Sturnina lilium</i>       | 30    | 56 | 21  |
| Phyllostomatidae | <i>Artibeus lituratus</i>    | 30    | 56 | 28  |
| Phyllostomatidae | <i>Ametrida centurio</i>     | 30/31 | 52 | 116 |
| Phyllostomatidae | <i>Ardops nichollsi</i>      | 30    | 56 | 116 |
| Phyllostomatidae | <i>Ariteus flavecens</i>     | 30    | 56 | 116 |
| Phyllostomatidae | <i>Artibeus fuliginosus</i>  | 30/31 | 56 | 116 |
| Phyllostomatidae | <i>Artibeus glaucus</i>      | 30/31 | 56 | 116 |
| Phyllostomatidae | <i>Artibeus planirostris</i> | 30/31 | 56 | 116 |
| Phyllostomatidae | <i>Brachyphylla pumila</i>   | 32    | 60 | 116 |
| Phyllostomatidae | <i>Chiroderma improvisum</i> | 26    | 46 | 116 |
| Phyllostomatidae | <i>Choeroniscus godmani</i>  | 20    | 36 | 116 |
| Phyllostomatidae | <i>Erophylla bombifrons</i>  | 32    | 60 | 116 |
| Phyllostomatidae | <i>Ectophylla alba</i>       | 30    | 56 | 116 |
| Phyllostomatidae | <i>Lonchophylla thomasi</i>  | 32    | 38 | 116 |
| Phyllostomatidae | <i>Phyllonycteris obtusa</i> | 32    | 60 | 116 |
| Phyllostomatidae | <i>Phyllops haitiensis</i>   | 30    | 56 | 116 |
| Phyllostomatidae | <i>Sturnina nana</i>         | 30    | 56 | 116 |
| Phyllostomatidae | <i>Sturnina magna</i>        | 30    | 56 | 116 |
| Phyllostomatidae | <i>Tonatia brasiliensis</i>  | 30    | 56 | 116 |
| Phyllostomatidae | <i>Tonatia carrikeri</i>     | 26    | 46 | 116 |
| Phyllostomatidae | <i>Tonatia sylvicola</i>     | 34    | 60 | 116 |
| Phyllostomatidae | <i>Vampyrops enfuscus</i>    | 30    | 56 | 116 |
| Phyllostomatidae | <i>Vampyrops nigellus</i>    | 30    | 56 | 116 |
| Phyllostomatidae | <i>Vampyressa pusilla</i>    | 22    | 20 | 116 |
| Phyllostomatidae | <i>Vampyressa melissa</i>    | 14    | 24 | 116 |
| Phyllostomatidae | <i>Vampyressa brocki</i>     | 24    | 44 | 116 |
| Phyllostomatidae | <i>Vampyressa bidens</i>     | 26    | 48 | 116 |
| Phyllostomatidae | <i>Vampyressa nymphaea</i>   | 26    | 48 | 116 |

|                  |                                   |    |    |     |
|------------------|-----------------------------------|----|----|-----|
| Phyllostomatidae | <i>Phyllostomus hastatus</i>      | 32 | 58 | 154 |
| Phyllostomatidae | <i>Phyllostomus discolor</i>      | 32 | 60 | 154 |
| Phyllostomatidae | <i>Macrotus waterhousii</i>       | 46 | 60 | 213 |
| Phyllostomatidae | <i>Micronycteris nicefori</i>     | 28 | 52 | 213 |
| Phyllostomatidae | <i>Micronycteris brachyotis</i>   | 32 | 60 | 213 |
| Phyllostomatidae | <i>Micronycteris minuta</i>       | 28 | 50 | 213 |
| Phyllostomatidae | <i>Micronycteris megalotis</i>    | 40 | 68 | 213 |
| Phyllostomatidae | <i>Mimon crenulatum</i>           | 32 | 60 | 213 |
| Phyllostomatidae | <i>Tonatia bidens</i>             | 16 | 20 | 213 |
| Phyllostomatidae | <i>Tonatia minuta</i>             | 30 | 56 | 213 |
| Phyllostomatidae | <i>Carollia brevicauda</i>        | 20 | 36 | 265 |
| Phyllostomatidae | <i>Carollia castanea</i>          | 20 | 36 | 265 |
| Phyllostomatidae | <i>Carollia perpicillata</i>      | 20 | 36 | 265 |
| Phyllostomatidae | <i>Choeroniscus intermedius??</i> | 20 | 36 | 265 |
| Physeteridae     | <i>Kogia breviceps</i>            | 42 | 80 | 10  |
| Physeteridae     | <i>Physeter catodon</i>           | 42 | 80 | 10  |
| Potoridae        | <i>Potorous tridactylus</i>       | 12 | 20 | 131 |
| Procyonidae      | <i>Bassariscus astutus</i>        | 38 | 68 | 300 |
| Procyonidae      | <i>Procyon lotor</i>              | 38 | 68 | 300 |
| Procyonidae      | <i>Bassaricyon sp.</i>            | 38 | 68 | 300 |
| Pseudocheiridae  | <i>Pseudocheirus peregrinus</i>   | 20 | 22 | 191 |
| Pseudocheiridae  | <i>Pseudocheirus dahli</i>        | 16 | 28 | 191 |
| Pteropodidae     | <i>Epomops frequenti</i>          | 36 | 64 | 128 |
| Pteropodidae     | <i>Hypsignathus monstrosus</i>    | 36 | 66 | 128 |
| Pteropodidae     | <i>Lissonycteris angolensis</i>   | 36 | 64 | 128 |
| Pteropodidae     | <i>Megaoglossus woermanni</i>     | 34 | 58 | 128 |
| Pteropodidae     | <i>Micropteropus pusillus</i>     | 35 | 62 | 128 |
| Pteropodidae     | <i>Myonycteris torquata</i>       | 36 | 64 | 128 |

|                |                                  |    |     |     |
|----------------|----------------------------------|----|-----|-----|
| Pteropodidae   | <i>Rousettus aegyptiacus</i>     | 36 | 64  | 128 |
| Pteropodidae   | <i>Scotonycteris ophiodon</i>    | 34 | 58  | 128 |
| Pteropodidae   | <i>Eonycteris spelaea</i>        | 36 | 66  | 136 |
| Pteropodidae   | <i>Macroglossus lagochilus</i>   | 34 | 60  | 136 |
| Pteropodidae   | <i>Macroglossus minimus</i>      | 34 | 60  | 136 |
| Pteropodidae   | <i>Megaerops ecaudatus</i>       | 24 | 44  | 304 |
| Rhinolophidae  | <i>Rhinolophus luctus</i>        | 52 | 60  | 5   |
| Rhinolophidae  | <i>Rhinolophus monoceros</i>     | 62 | 60  | 5   |
| Rhinolophidae  | <i>Rhinolophus euryale</i>       | 58 | 60  | 62  |
| Rhinolophidae  | <i>Rhinolophus ferrumequinum</i> | 58 | 60  | 62  |
| Rhinolophidae  | <i>Rhinolophus ferrumequinum</i> | 56 | 60  | 62  |
| Rhinolophidae  | <i>Rhinolophus acuminatus</i>    | 62 | 60  | 218 |
| Rhinolophidae  | <i>Rhinolophus affinis</i>       | 62 | 70  | 218 |
| Rhinolophidae  | <i>Rhinolophus balsii</i>        | 58 | 60  | 218 |
| Rhinolophidae  | <i>Rhinolophus clivosus</i>      | 58 | 62  | 218 |
| Rhinolophidae  | <i>Rhinolophus cornutus</i>      | 62 | 60  | 218 |
| Rhinolophidae  | <i>Rhinolophus darlingi</i>      | 58 | 60  | 218 |
| Rhinolophidae  | <i>Rhinolophus hipposideros</i>  | 56 | 60  | 218 |
| Rhinolophidae  | <i>Rhinolophus malayanus</i>     | 62 | 60  | 218 |
| Rhinolophidae  | <i>Rhinolophus pusillus</i>      | 62 | 60  | 218 |
| Rhinopomatidae | <i>Rhinopoma microphyllum</i>    | 42 | 64  | 144 |
| Rhinopomatidae | <i>Rhinopoma hardwickei</i>      | 36 | 68  | 144 |
| Rhynocerotidae | <i>Ceratotherium simun</i>       | 82 | 80  | 138 |
| Rhynocerotidae | <i>Diceros bicornis</i>          | 84 | 106 | 146 |
| Rhynocerotidae | <i>Rhinoceros unicornis</i>      | 82 | 100 | 296 |
| Sciuridae      | <i>Marmota marmota</i>           | 38 | 60  | 103 |
| Sciuridae      | <i>Marmota broweri</i>           | 36 | 62  | 135 |
| Sciuridae      | <i>Marmota caligata</i>          | 42 | 62  | 135 |

|           |                                          |    |    |     |
|-----------|------------------------------------------|----|----|-----|
| Sciuridae | <i>Marmota flaviventris</i>              | 42 | 62 | 135 |
| Sciuridae | <i>Marmota monax</i>                     | 38 | 62 | 135 |
| Sciuridae | <i>Citellus citellus</i>                 | 40 | 62 | 151 |
| Sciuridae | <i>Citellus armatus</i>                  | 34 | 64 | 164 |
| Sciuridae | <i>Citellus beldingi</i>                 | 30 | 56 | 164 |
| Sciuridae | <i>Citellus columbianus</i>              | 32 | 60 | 164 |
| Sciuridae | <i>Citellus dauricus</i>                 | 36 | 68 | 164 |
| Sciuridae | <i>Citellus erythrogegensys</i>          | 36 | 68 | 164 |
| Sciuridae | <i>Citellus fulvus</i>                   | 36 | 68 | 164 |
| Sciuridae | <i>Citellus mollis</i>                   | 38 | 62 | 164 |
| Sciuridae | <i>Citellus pygmaeus</i>                 | 36 | 68 | 164 |
| Sciuridae | <i>Citellus elegans</i>                  | 34 | 64 | 164 |
| Sciuridae | <i>Citellus nevadensis</i>               | 34 | 64 | 164 |
| Sciuridae | <i>Citellus undulatus</i>                | 32 | 60 | 164 |
| Sciuridae | <i>Citellus parryi</i>                   | 34 | 64 | 164 |
| Sciuridae | <i>Citellus relictus</i>                 | 36 | 68 | 164 |
| Sciuridae | <i>Citellus richardsoni</i>              | 36 | 64 | 164 |
| Sciuridae | <i>Citellus townsendii</i>               | 36 | 68 | 164 |
| Sciuridae | <i>Citellus undulatus</i>                | 36 | 68 | 164 |
| Sciuridae | <i>Citellus vigilis</i>                  | 46 | 66 | 164 |
| Sciuridae | <i>Citellus washingtoni</i>              | 36 | 66 | 164 |
| Sciuridae | <i>Ammospermophilus interpres</i>        | 32 | 60 | 178 |
| Sciuridae | <i>Ammospermophilus leucurus</i>         | 32 | 60 | 178 |
| Sciuridae | <i>Ammospermophilus nelsoni</i>          | 32 | 60 | 178 |
| Sciuridae | <i>Ammospermophilus spilosoma</i>        | 32 | 60 | 178 |
| Sciuridae | <i>Ammospermophilus insularis</i>        | 32 | 60 | 179 |
| Sciuridae | <i>Spermophilus townsendi canus</i>      | 46 | 68 | 193 |
| Sciuridae | <i>Spermophilus townsendi idahoensis</i> | 38 | 66 | 193 |



|           |                                         |    |    |     |
|-----------|-----------------------------------------|----|----|-----|
| Sciuridae | <i>Spermophilus townsendi townsendi</i> | 36 | 68 | 193 |
| Sciuridae | <i>Petaurista petaurista</i>            | 38 | 72 | 195 |
| Sciuridae | <i>Dremomys rufigensis</i>              | 38 | 68 | 196 |
| Sciuridae | <i>Menetes berdmorei</i>                | 62 | 76 | 196 |
| Sciuridae | <i>Sciurus anomalus</i>                 | 40 | 76 | 196 |
| Sciuridae | <i>Sciurus granatensis</i>              | 42 | 78 | 196 |
| Sciuridae | <i>Spermophilus leptodactylus</i>       | 38 | 70 | 197 |
| Sciuridae | <i>Xerus rutilus</i>                    | 38 | 70 | 197 |
| Sciuridae | <i>Cynomys ludovicicianus</i>           | 50 | 96 | 198 |
| Sciuridae | <i>Callosciurus flavimanus</i>          | 40 | 68 | 199 |
| Sciuridae | <i>Glaucomys sabrinus lascivus</i>      | 48 | 74 | 199 |
| Sciuridae | <i>Glaucomys volans</i>                 | 48 | 72 | 199 |
| Sciuridae | <i>Sciurus aberti</i>                   | 40 | 76 | 199 |
| Sciuridae | <i>Sciurus carolinensis</i>             | 40 | 76 | 199 |
| Sciuridae | <i>Sciurus griseus</i>                  | 40 | 76 | 199 |
| Sciuridae | <i>Sciurus niger rufiventer</i>         | 40 | 76 | 199 |
| Sciuridae | <i>Eutamias sibiricus</i>               | 38 | 52 | 202 |
| Sciuridae | <i>Ammospermophilus harrisi</i>         | 32 | 60 | 276 |
| Sciuridae | <i>Eutamias minimus</i>                 | 38 | 56 | 276 |
| Sciuridae | <i>Eutamias quatrivittatus</i>          | 38 | 58 | 276 |
| Sciuridae | <i>Eutamias umbrius</i>                 | 38 | 58 | 276 |
| Sciuridae | <i>Funambulus pennati</i>               | 54 | 58 | 276 |
| Sciuridae | <i>Spermophilus richardsonii</i>        | 34 | 64 | 276 |
| Sciuridae | <i>Spermophilus beldingi</i>            | 30 | 56 | 276 |
| Sciuridae | <i>Spermophilus mexicanus pavidens</i>  | 34 | 64 | 276 |
| Sciuridae | <i>Spermophilus tridecemlineatus</i>    | 34 | 64 | 276 |
| Sciuridae | <i>Spermophilus tereticadus</i>         | 36 | 68 | 276 |
| Sciuridae | <i>Tamias striatus</i>                  | 38 | 58 | 276 |

|                |                                 |    |    |     |
|----------------|---------------------------------|----|----|-----|
| Solenodontidae | <i>Solenodon paradoxus</i>      | 34 | 60 | 162 |
| Soricidae      | <i>Crocidura dsnezumi</i>       | 40 | 44 | 44  |
| Soricidae      | <i>Crocidura gueldenstedtii</i> | 40 | 46 | 44  |
| Soricidae      | <i>Cryptotis parva</i>          | 52 | 50 | 119 |
| Soricidae      | <i>Blarina brevicauda</i>       | 50 | 48 | 120 |
| Soricidae      | <i>Blarina carolinensis</i>     | 52 | 50 | 120 |
| Soricidae      | <i>Blarina hylophaga</i>        | 52 | 62 | 120 |
| Soricidae      | <i>Crocidura gracilipes</i>     | 52 | 82 | 188 |
| Soricidae      | <i>Crocidura nimbae</i>         | 50 | 82 | 188 |
| Soricidae      | <i>Crocidura nigeriae</i>       | 50 | 72 | 188 |
| Soricidae      | <i>Crocidura odorata</i>        | 50 | 62 | 188 |
| Soricidae      | <i>Crocidura planiceps</i>      | 44 | 68 | 188 |
| Soricidae      | <i>Crocidura poensis</i>        | 50 | 72 | 188 |
| Soricidae      | <i>Crocidura wimmeri</i>        | 50 | 80 | 188 |
| Soricidae      | <i>Anourosorex squamipes</i>    | 50 | 92 | 228 |
| Soricidae      | <i>Crocidura bottegi</i>        | 40 | 54 | 228 |
| Soricidae      | <i>Crocidura crossei</i>        | 44 | 62 | 228 |
| Soricidae      | <i>Crocidura horsfieldi</i>     | 38 | 44 | 228 |
| Soricidae      | <i>Crocidura lamottei</i>       | 52 | 64 | 228 |
| Soricidae      | <i>Crocidura lasiura</i>        | 40 | 54 | 228 |
| Soricidae      | <i>Crocidura leucodon</i>       | 28 | 52 | 228 |
| Soricidae      | <i>Crocidura occidentalis</i>   | 50 | 62 | 228 |
| Soricidae      | <i>Crocidura russula</i>        | 42 | 58 | 228 |
| Soricidae      | <i>Crocidura suaveolens</i>     | 40 | 46 | 228 |
| Soricidae      | <i>Crocidura theresae</i>       | 50 | 78 | 228 |
| Soricidae      | <i>Crocidura zimmermanni</i>    | 34 | 40 | 228 |
| Soricidae      | <i>Diplomesodon pulchellum</i>  | 44 | 50 | 228 |
| Soricidae      | <i>Neomys anomalus</i>          | 52 | 94 | 228 |

|           |                             |    |     |     |
|-----------|-----------------------------|----|-----|-----|
| Soricidae | <i>Neomys fodiens</i>       | 52 | 94  | 228 |
| Soricidae | <i>Notlosorex crawfordi</i> | 68 | 102 | 228 |
| Soricidae | <i>Sorex arcticus</i>       | 28 | 34  | 228 |
| Soricidae | <i>Sorex araneus</i>        | 22 | 36  | 228 |
| Soricidae | <i>Sorex asper</i>          | 32 | 52  | 228 |
| Soricidae | <i>Sorex bendirii</i>       | 54 | 70  | 228 |
| Soricidae | <i>Sorex buchariensis</i>   | 40 | 56  | 228 |
| Soricidae | <i>Sorex caecutiens</i>     | 42 | 60  | 228 |
| Soricidae | <i>Sorex caucasicus</i>     | 22 | 40  | 228 |
| Soricidae | <i>Sorex cinereus</i>       | 66 | 70  | 228 |
| Soricidae | <i>Sorex coronatus</i>      | 22 | 38  | 228 |
| Soricidae | <i>Sorex daphaenodon</i>    | 24 | 42  | 228 |
| Soricidae | <i>Sorex fumeus</i>         | 66 | 94  | 228 |
| Soricidae | <i>Sorex granarius</i>      | 32 | 34  | 228 |
| Soricidae | <i>Sorex isodon</i>         | 42 | 60  | 228 |
| Soricidae | <i>Sorex minutissimus</i>   | 42 | 72  | 228 |
| Soricidae | <i>Sorex minutus</i>        | 42 | 54  | 228 |
| Soricidae | <i>Sorex mirabilis</i>      | 38 | 60  | 228 |
| Soricidae | <i>Sorex ornatus</i>        | 54 | 72  | 228 |
| Soricidae | <i>Sorex raddei</i>         | 36 | 66  | 228 |
| Soricidae | <i>Sorex samniticus</i>     | 52 | 50  | 228 |
| Soricidae | <i>Sorex shinto</i>         | 42 | 58  | 228 |
| Soricidae | <i>Sorex sinuosus</i>       | 54 | 72  | 228 |
| Soricidae | <i>Sorex trowbridgii</i>    | 34 | 40  | 228 |
| Soricidae | <i>Sorex tundrensis</i>     | 30 | 50  | 228 |
| Soricidae | <i>Sorex unguiculatus</i>   | 42 | 58  | 228 |
| Soricidae | <i>Sorex vagrans</i>        | 54 | 58  | 228 |
| Soricidae | <i>Sorex vir</i>            | 42 | 64  | 228 |

|                |                                   |    |     |     |
|----------------|-----------------------------------|----|-----|-----|
| Soricidae      | <i>Sorex volnuchi</i>             | 40 | 56  | 228 |
| Soricidae      | <i>Suncus etruscus</i>            | 42 | 68  | 228 |
| Soricidae      | <i>Suncus murinus</i>             | 40 | 52  | 228 |
| Soricidae      | <i>Sylvisorex megalura</i>        | 48 | 92  | 228 |
| Suidae         | <i>Phacochoerus aetiopicus</i>    | 34 | 60  | 50  |
| Suidae         | <i>Sus scroffa</i>                | 36 | 60  | 50  |
| Suidae         | <i>Sus salvanius</i>              | 38 | 60  | 51  |
| Suidae         | <i>Sus celebensis</i>             | 38 | 60  | 52  |
| Suidae         | <i>Sus verrucosus</i>             | 38 | 60  | 52  |
| Suidae         | <i>Babyrousa bayrousa</i>         | 38 | 64  | 53  |
| Suidae         | <i>Hylochoerus meinertzhageni</i> | 32 | 60  | 186 |
| Suidae         | <i>Potamochoerus porcus</i>       | 34 | 56  | 186 |
| Tachyglossidae | <i>Tachyglossus aculeatus</i>     | 64 | 124 | 39  |
| Tachyglossidae | <i>Zaglossus bruijni</i>          | 64 | 124 | 294 |
| Talpidae       | <i>Condylura cristata</i>         | 34 | 64  | 228 |
| Talpidae       | <i>Galemys pyrenaicus</i>         | 42 | 64  | 228 |
| Talpidae       | <i>Mogera robusta</i>             | 36 | 56  | 228 |
| Talpidae       | <i>Neurotrichus gibsii</i>        | 38 | 72  | 228 |
| Talpidae       | <i>Parascalops breweri</i>        | 34 | 56  | 228 |
| Talpidae       | <i>Scalopus aquaticus</i>         | 34 | 64  | 228 |
| Talpidae       | <i>Scapanus latimarus</i>         | 34 | 60  | 228 |
| Talpidae       | <i>Talpa altaica</i>              | 34 | 64  | 228 |
| Talpidae       | <i>Talpa caeca</i>                | 36 | 64  | 228 |
| Talpidae       | <i>Talpa caucasica</i>            | 38 | 62  | 228 |
| Talpidae       | <i>Talpa europaea</i>             | 34 | 64  | 228 |
| Talpidae       | <i>Talpa levantis</i>             | 34 | 62  | 228 |
| Talpidae       | <i>Talpa minima</i>               | 34 | 62  | 228 |
| Talpidae       | <i>Talpa occidentalis</i>         | 34 | 64  | 228 |

|              |                                   |    |    |     |
|--------------|-----------------------------------|----|----|-----|
| Talpidae     | <i>Talpa romana</i>               | 34 | 62 | 228 |
| Tapiridae    | <i>Tapirus terrestris</i>         | 80 | 80 | 145 |
| Tapiridae    | <i>Tapirus pinchaque</i>          | 76 | 80 | 145 |
| Tapiridae    | <i>Tapirus bairdii</i>            | 80 | 94 | 145 |
| Tapiridae    | <i>Tapirus indicus</i>            | 52 | 84 | 145 |
| Tarsiidae    | <i>Tarsius syrichta</i>           | 80 | 90 | 86  |
| Tarsiidae    | <i>Tarsius bancanus</i>           | 80 | 90 | 157 |
| Tarsiidae    | <i>Tarsius diana</i>              | 46 | 78 | 206 |
| Tarsipedidae | <i>Tarsipes rostratus</i>         | 24 | 22 | 165 |
| Tayassuidae  | <i>Catagonus wagneri</i>          | 20 | 36 | 34  |
| Tayassuidae  | <i>Tayassu albirostris</i>        | 26 | 48 | 34  |
| Tayassuidae  | <i>Tayassu tajacu</i>             | 30 | 48 | 34  |
| Tenrecidae   | <i>Centete (Tenrec) eucadatus</i> | 38 | 72 | 48  |
| Tenrecidae   | <i>Microgale dobsoni</i>          | 30 | 50 | 49  |
| Tenrecidae   | <i>Microgale talazaci</i>         | 30 | 52 | 49  |
| Tenrecidae   | <i>Echinops telfairi</i>          | 40 | 76 | 228 |
| Tenrecidae   | <i>Hemicentetes semispinosus</i>  | 38 | 48 | 228 |
| Tenrecidae   | <i>Microgale cowani</i>           | 54 | 54 | 228 |
| Tenrecidae   | <i>Microgale thomsoni</i>         | 30 | 48 | 228 |
| Tenrecidae   | <i>Micropotamogale lamottei</i>   | 38 | 72 | 228 |
| Tenrecidae   | <i>Setifer setosus</i>            | 40 | 50 | 228 |
| Tragulidae   | <i>Tragulus javanicus</i>         | 32 | 60 | 174 |
| Trichechidae | <i>Trichechus manatus</i>         | 48 | 84 | 173 |
| Tupaiaidae   | <i>Tupaia chinensis</i>           | 62 | 72 | 14  |
| Tupaiaidae   | <i>Tupaia longipes</i>            | 60 | 70 | 14  |
| Tupaiaidae   | <i>Tupaia montana</i>             | 68 | 70 | 14  |
| Tupaiaidae   | <i>Tupaia palawanensis</i>        | 52 | 68 | 14  |
| Tupaiaidae   | <i>Urogale everetti</i>           | 44 | 76 | 14  |

|                  |                               |    |    |     |
|------------------|-------------------------------|----|----|-----|
| Tupaiaidae       | <i>Tupaia glis</i>            | 60 | 70 | 157 |
| Tupaiaidae       | <i>Tupaia berlingeri</i>      | 62 | 72 | 190 |
| Ursidae          | <i>Ailuropoda melanoluca</i>  | 42 | 74 | 204 |
| Ursidae          | <i>Black bear</i>             | 74 | 76 | 204 |
| Ursidae          | <i>Brown bear</i>             | 74 | 76 | 204 |
| Ursidae          | <i>Polar bear</i>             | 74 | 76 | 204 |
| Ursidae          | <i>Sun bear</i>               | 74 | 76 | 204 |
| Ursidae          | <i>Sloth bear</i>             | 74 | 76 | 204 |
| Ursidae          | <i>Asiatic black</i>          | 74 | 76 | 204 |
| Ursidae          | <i>Tremarctos ornatus</i>     | 52 | 82 | 204 |
| Vespertilionidae | <i>Barbastella leucomelas</i> | 32 | 50 | 4   |
| Vespertilionidae | <i>Eptesicus japonensis</i>   | 50 | 48 | 4   |
| Vespertilionidae | <i>Myotis frater</i>          | 44 | 52 | 4   |
| Vespertilionidae | <i>Myotis hosonoi</i>         | 44 | 52 | 4   |
| Vespertilionidae | <i>Myotis macrodactylus</i>   | 44 | 52 | 4   |
| Vespertilionidae | <i>Myotis nattereri</i>       | 44 | 50 | 4   |
| Vespertilionidae | <i>Murina aurata</i>          | 44 | 60 | 4   |
| Vespertilionidae | <i>Murina leucogaster</i>     | 44 | 58 | 4   |
| Vespertilionidae | <i>Nyctalus furvus</i>        | 44 | 52 | 4   |
| Vespertilionidae | <i>Nyctalus lasiopterus</i>   | 42 | 50 | 4   |
| Vespertilionidae | <i>Pipistrellus endoi</i>     | 36 | 50 | 4   |
| Vespertilionidae | <i>Pipistrellus abramus</i>   | 26 | 44 | 4   |
| Vespertilionidae | <i>Vespertilio orientalis</i> | 38 | 50 | 4   |
| Vespertilionidae | <i>Vespertilio superans</i>   | 38 | 50 | 4   |
| Vespertilionidae | <i>Rhogeesa genowasyi</i>     | 42 | 50 | 16  |
| Vespertilionidae | <i>Rhogeesa parvula</i>       | 44 | 50 | 16  |
| Vespertilionidae | <i>Rhogeesa tumida</i>        | 30 | 50 | 16  |
| Vespertilionidae | <i>Idionycteris Phyllotis</i> | 30 | 50 | 19  |

|                  |                                  |    |    |     |
|------------------|----------------------------------|----|----|-----|
| Vespertilionidae | <i>Myotis carteri</i>            | 44 | 50 | 19  |
| Vespertilionidae | <i>Myotis auriculus</i>          | 44 | 52 | 40  |
| Vespertilionidae | <i>Myotis austroriparius</i>     | 44 | 50 | 40  |
| Vespertilionidae | <i>Myotis evotis</i>             | 44 | 52 | 40  |
| Vespertilionidae | <i>Myotis grisescens</i>         | 44 | 50 | 40  |
| Vespertilionidae | <i>Myotis keaysi</i>             | 44 | 50 | 40  |
| Vespertilionidae | <i>Myotis keenii</i>             | 44 | 50 | 40  |
| Vespertilionidae | <i>Myotis nigricans</i>          | 44 | 50 | 40  |
| Vespertilionidae | <i>Myotis sodalis</i>            | 44 | 50 | 40  |
| Vespertilionidae | <i>Myotis thysanodes</i>         | 44 | 52 | 40  |
| Vespertilionidae | <i>Myotis velifer</i>            | 44 | 50 | 40  |
| Vespertilionidae | <i>Myotis yumanensis</i>         | 44 | 50 | 40  |
| Vespertilionidae | <i>Nycticeius humeralis</i>      | 46 | 48 | 40  |
| Vespertilionidae | <i>Antrozous pallidus</i>        | 46 | 50 | 41  |
| Vespertilionidae | <i>Eptesicus fuscus</i>          | 50 | 48 | 41  |
| Vespertilionidae | <i>Eptesicus lyinni</i>          | 50 | 48 | 41  |
| Vespertilionidae | <i>Lasiurus borealis</i>         | 28 | 48 | 41  |
| Vespertilionidae | <i>Lasiurus seminolus</i>        | 28 | 48 | 41  |
| Vespertilionidae | <i>Lasiurus cinereus</i>         | 28 | 48 | 41  |
| Vespertilionidae | <i>Lasiurus ega</i>              | 28 | 48 | 41  |
| Vespertilionidae | <i>Lasionycteris noctivagans</i> | 20 | 28 | 41  |
| Vespertilionidae | <i>Myotis albescens</i>          | 44 | 50 | 41  |
| Vespertilionidae | <i>Pispitrellus subflavus</i>    | 30 | 50 | 41  |
| Vespertilionidae | <i>Myotis oxygnathus</i>         | 44 | 50 | 42  |
| Vespertilionidae | <i>Nyctalus noctula</i>          | 42 | 50 | 83  |
| Vespertilionidae | <i>Miniopterus schreibersi</i>   | 46 | 52 | 130 |
| Vespertilionidae | <i>Myotis mystacinus</i>         | 44 | 52 | 130 |
| Vespertilionidae | <i>Myotis siligerensis</i>       | 44 | 52 | 130 |

|                  |                                 |       |    |     |
|------------------|---------------------------------|-------|----|-----|
| Vespertilionidae | <i>Pispitrellus pulveratus</i>  | 44    | 52 | 130 |
| Vespertilionidae | <i>Tylonicteris robustula</i>   | 32    | 50 | 130 |
| Vespertilionidae | <i>Plecotus mexicanus</i>       | 32    | 50 | 168 |
| Vespertilionidae | <i>Plecotus rafinesqui</i>      | 32    | 50 | 168 |
| Vespertilionidae | <i>Otonycteris hemprichii</i>   | 28    | 46 | 217 |
| Vespertilionidae | <i>Plecotus austriacus</i>      | 32    | 50 | 217 |
| Vespertilionidae | <i>Myotis beccstenii</i>        | 44    | 50 | 227 |
| Vespertilionidae | <i>Myotis blythi</i>            | 44    | 50 | 227 |
| Vespertilionidae | <i>Myotis capaccinii</i>        | 44    | 50 | 227 |
| Vespertilionidae | <i>Myotis emarginatus</i>       | 44    | 50 | 227 |
| Vespertilionidae | <i>Myotis myotis</i>            | 44    | 50 | 227 |
| Vespertilionidae | <i>Miniopterus inflatus</i>     | 46    | 50 | 237 |
| Vespertilionidae | <i>Nycticeius schlieffeni</i>   | 34    | 52 | 237 |
| Vespertilionidae | <i>Scotophilus dinganii</i>     | 36    | 50 | 237 |
| Vespertilionidae | <i>Scotophilus nux</i>          | 36    | 50 | 237 |
| Vespertilionidae | <i>Scotophilus viridis</i>      | 36    | 50 | 237 |
| Vespertilionidae | <i>Euderma maculatum</i>        | 30    | 52 | 268 |
| Vespertilionidae | <i>Plecotus townsendii</i>      | 32    | 50 | 268 |
| Vespertilionidae | <i>Barbastella barbastellus</i> | 32    | 50 | 278 |
| Vespertilionidae | <i>Plecotus auritus</i>         | 32    | 50 | 278 |
| Vespertilionidae | <i>Vespertilio murinus</i>      | 38    | 50 | 278 |
| Vespertilionidae | <i>Tylonicteris pachypus</i>    | 46    | 54 | 305 |
| Viverridae       | <i>Crossarchus obscurus</i>     | 36    | 68 | 105 |
| Viverridae       | <i>Cynictis penicillata</i>     | 36    | 68 | 105 |
| Viverridae       | <i>Helogale parvula</i>         | 36    | 68 | 105 |
| Viverridae       | <i>Herpestes auropunctatus</i>  | 35/36 | 68 | 105 |
| Viverridae       | <i>Herpestes brachyurus</i>     | 35/36 | 68 | 105 |
| Viverridae       | <i>Herpestes edwardesi</i>      | 35/36 | 68 | 105 |



|            |                                          |       |    |     |
|------------|------------------------------------------|-------|----|-----|
| Viverridae | <i>Herpestes fuscus</i>                  | 35/36 | 68 | 105 |
| Viverridae | <i>Herpestes icneumon</i>                | 43/44 | 68 | 105 |
| Viverridae | <i>Herpestes pulvulentus</i>             | 39/40 | 76 | 105 |
| Viverridae | <i>Herpestes sanguineus</i>              | 41/42 | 68 | 105 |
| Viverridae | <i>Herpestes urva</i>                    | 36    | 68 | 105 |
| Viverridae | <i>Mungos mungo</i>                      | 36    | 68 | 105 |
| Viverridae | <i>Artogalidia trivigarta stigmatica</i> | 40    | 62 | 298 |
| Viverridae | <i>Cynogale bennetti</i>                 | 42    | 68 | 298 |
| Viverridae | <i>Ailurus fulges</i>                    | 36    | 66 | 300 |
| Viverridae | <i>Arctictis binturong</i>               | 42    | 70 | 300 |
| Viverridae | <i>Atilax paludinosus</i>                | 36    | 64 | 300 |
| Viverridae | <i>Bdeogale sp.</i>                      | 36    | 62 | 300 |
| Viverridae | <i>Genetta tigrina</i>                   | 52    | 96 | 300 |
| Viverridae | <i>Cryptoprocta ferox</i>                | 42    | 72 | 300 |
| Viverridae | <i>Fossa fossa</i>                       | 42    | 70 | 300 |
| Viverridae | <i>Galidia elegans</i>                   | 44    | 74 | 300 |
| Viverridae | <i>Hemigalus derbyanus</i>               | 42    | 66 | 300 |
| Viverridae | <i>Nandinia binota</i>                   | 38    | 70 | 300 |
| Viverridae | <i>Paguna larvata</i>                    | 44    | 70 | 300 |
| Viverridae | <i>Paradoxurus hermaphroditicus</i>      | 42    | 68 | 300 |
| Viverridae | <i>Prionodon linsang</i>                 | 34    | 62 | 300 |
| Viverridae | <i>Viverricula indica</i>                | 36    | 64 | 300 |
| Vombatidae | <i>Phascolomis mitchelli</i>             | 14    | 24 | 175 |
| Vombatidae | <i>Vombatus ursinus</i>                  | 14    | 24 | 235 |
| Ziphiidae  | <i>Mesoplodon carlhubbsi</i>             | 42    | 74 | 13  |
| Ziphiidae  | <i>Mesoplodon europaeus</i>              | 42    | 74 | 13  |

**Table S2.** Species and variables utilised in the phylogenetic generalized least squares regression (PGLS) of microstructural karyotypic diversification rate (rKDmicro). Body Mass (BM); Sexual Maturity Age in days (SMA.d); Litter Size per year (LitPerYear); Maximum Life Span in months (MaxLifespan.m); Basal Metabolic Rate (MetRateMass\_g); Species Distribution Area (distr\_Area\_km2). All biological traits are log transformed.

| Order        | Family         | Specie                   | BM    | SMA.d | LitPerYear   | MaxLifespan.m | MetRateMass_g | distr_Area_km2 | Chromosome_changes | Ancestral        | Ancestral Origin | rKDmicro | Ref |
|--------------|----------------|--------------------------|-------|-------|--------------|---------------|---------------|----------------|--------------------|------------------|------------------|----------|-----|
| Carnivora    | Ursidae        | Ailuropoda melanoleuca   | 11.68 | 7.79  | -0.356674944 | 5.89          | 10.83         | 10.50          |                    | 34 Carnivora     | 60               | 0.5667   | 340 |
| Rodentia     | Cricetidae     | Akodon cursor            | 3.68  | 3.80  | 1.791759469  | 3.81          | 3.60          | 14.19          |                    | 26 Muroidea      | 30               | 0.8667   | 329 |
| Rodentia     | Cricetidae     | Akodon montensis         | 3.55  | 5.42  | 0.222762547  | 3.95          | 3.17          | 11.06          |                    | 19 Muroidea      | 30               | 0.6333   | 329 |
| Rodentia     | Cricetidae     | Akodon paranaensis       | 4.90  | 5.89  | 0.006931472  | 4.03          | 4.86          | 9.73           |                    | 10 Muroidea      | 30               | 0.3333   | 329 |
| Rodentia     | Cricetidae     | Akodon serrensis         | 3.34  | 4.36  | 0.937062995  | 3.71          | 3.39          | 10.84          |                    | 5 Muroidea       | 30               | 0.1667   | 329 |
| Rodentia     | Cricetidae     | Alloccricetus curtatus   | 3.87  | 4.89  | 0.720500673  | 4.03          | 3.87          | 13.79          |                    | 24 Muroidea      | 30               | 0.8000   | 335 |
| Rodentia     | Cricetidae     | Alloccricetus eversmanni | 4.75  | 4.85  | 0.693147181  | 4.09          | 4.74          | 14.45          |                    | 21 Muroidea      | 30               | 0.7000   | 335 |
| Primata      | Atelidae       | Alouatta belzebul        | 8.73  | 6.73  | -0.074011008 | 5.69          | 8.59          | 14.46          |                    | 12 Platyrrhini   | 21.4             | 0.5607   | 326 |
| Primata      | Atelidae       | Alouatta caraya          | 8.63  | 7.15  | -0.020202707 | 5.50          | 8.43          | 14.24          |                    | 12 Platyrrhini   | 21.4             | 0.5607   | 326 |
| Primata      | Atelidae       | Alouatta guariba         | 8.55  | 6.80  | -0.059687908 | 5.63          | 8.34          | 13.62          |                    | 9 Platyrrhini    | 21.4             | 0.4206   | 326 |
| Primata      | Atelidae       | Alouatta macconnelli     | 8.89  | 6.61  | -0.024607314 | 5.22          | 8.60          | 14.33          |                    | 11 Platyrrhini   | 21.4             | 0.5140   | 326 |
| Primata      | Atelidae       | Alouatta sara            | 8.80  | 6.71  | -0.041287194 | 5.55          | 8.44          | 13.17          |                    | 16 Platyrrhini   | 21.4             | 0.7477   | 326 |
| Primata      | Atelidae       | Alouatta seniculus       | 8.76  | 7.43  | -0.356674944 | 5.70          | 8.62          | 14.74          |                    | 16 Platyrrhini   | 21.4             | 0.7477   | 326 |
| Chiroptera   | Phyllostomidae | Anoura cultrata          | 2.86  | 5.52  | 0.654120203  | 4.66          | 2.88          | 14.44          |                    | 8 Phyllostomidae | 37.5             | 0.2133   | 338 |
| Primata      | Cebidae        | Aotus lemurinus          | 6.76  | 6.63  | 0            | 5.38          | 6.77          | 12.68          |                    | 9 Platyrrhini    | 21.4             | 0.4206   | 326 |
| Primata      | Cebidae        | Aotus nancymae           | 6.67  | 6.60  | 0.024233758  | 5.41          | 6.75          | 11.97          |                    | 14 Platyrrhini   | 21.4             | 0.6542   | 326 |
| Chiroptera   | Hipposideridae | Aselliscus stoliczkanus  | 1.81  | 5.96  | 0            | 5.42          | 1.96          | 14.15          |                    | 14 Chiroptera    | 70               | 0.2000   | 344 |
| Primata      | Atelidae       | Ateles belzebuth         | 8.81  | 7.63  | -1.203972804 | 5.82          | 8.88          | 13.85          |                    | 19 Platyrrhini   | 21.4             | 0.8879   | 326 |
| Primata      | Atelidae       | Ateles geoffroyi         | 8.93  | 7.65  | -1.139434283 | 5.79          | 9.41          | 13.60          |                    | 19 Platyrrhini   | 21.4             | 0.8879   | 326 |
| Primata      | Atelidae       | Ateles paniscus          | 9.07  | 7.65  | -0.693147181 | 6.12          | 9.43          | 13.70          |                    | 18 Platyrrhini   | 21.4             | 0.8411   | 326 |
| Rodentia     | Muridae        | Bandicota savilei        | 5.56  | 5.85  | 0.57941887   | 4.53          | 5.56          | 13.43          |                    | 12 Rattini       | 8.4              | 1.4286   | 323 |
| Rodentia     | Muridae        | Berymys berdmorei        | 5.46  | 5.77  | 0.585408279  | 4.42          | 5.48          | 13.25          |                    | 11 Rattini       | 8.4              | 1.3095   | 323 |
| Rodentia     | Muridae        | Berymys bowersi          | 5.88  | 5.66  | 0.45995748   | 3.55          | 5.82          | 14.37          |                    | 11 Rattini       | 8.4              | 1.3095   | 323 |
| Eulipotyphla | Soricidae      | Blarinella griselda      | 2.08  | 5.50  | 0.496090951  | 3.26          | 2.22          | 11.77          |                    | 20 Eulipotyphla  | 73               | 0.2740   | 325 |
| Lagomorpha   | Leporidae      | Brachylagus idahoensis   | 6.07  | 5.53  | 0.693147181  | 4.04          | 6.09          | 13.14          |                    | 10 Lagomorpha    | 39.6             | 0.2525   | 322 |
| Primata      | Atelidae       | Brachyteles arachnoides  | 9.26  | 7.96  | -1.078809661 | 6.17          | 9.45          | 8.82           |                    | 6 Platyrrhini    | 21.4             | 0.2804   | 326 |

|                |                 |                          |       |      |              |      |       |       |    |                          |      |        |     |
|----------------|-----------------|--------------------------|-------|------|--------------|------|-------|-------|----|--------------------------|------|--------|-----|
| Lagomorpha     | Leporidae       | Bunolagus monticularis   | 7.47  | 6.46 | 0.023274301  | 5.19 | 7.71  | 10.52 | 20 | Lagomorpha               | 39.6 | 0.5051 | 322 |
| Primata        | Pitheciidae     | Cacajao calvus           | 8.14  | 7.14 | -0.693147181 | 5.78 | 8.49  | 11.55 | 4  | Platyrrhini              | 21.4 | 0.1869 | 326 |
| Primata        | Pitheciidae     | Callicebus cupreus       | 7.02  | 6.82 | -0.072570693 | 5.76 | 7.19  | 13.45 | 11 | Platyrrhini              | 21.4 | 0.5140 | 326 |
| Primata        | Pitheciidae     | Callicebus donacophilus  | 6.80  | 6.51 | 0.019739915  | 5.70 | 6.79  | 12.57 | 11 | Platyrrhini              | 21.4 | 0.5140 | 326 |
| Primata        | Pitheciidae     | Callicebus lugens        | 6.96  | 6.60 | 0.01384853   | 5.52 | 6.90  | 10.91 | 6  | Platyrrhini              | 21.4 | 0.2804 | 326 |
| Primata        | Pitheciidae     | Callicebus moloch        | 6.86  | 7.14 | 0            | 5.72 | 6.98  | 13.72 | 5  | Platyrrhini              | 21.4 | 0.2336 | 326 |
| Primata        | Pitheciidae     | Callicebus pallescens    | 6.96  | 6.57 | -0.02447052  | 5.35 | 6.96  | 11.44 | 9  | Platyrrhini              | 21.4 | 0.4206 | 326 |
| Primata        | Pitheciidae     | Callicebus personatus    | 7.24  | 6.62 | 0.020585959  | 5.53 | 7.19  | 12.06 | 6  | Platyrrhini              | 21.4 | 0.2804 | 326 |
| Primata        | Cebidae         | Callimico goeldii        | 6.32  | 6.03 | 0.157003749  | 5.37 | 6.30  | 13.05 | 5  | Platyrrhini              | 21.4 | 0.2336 | 326 |
| Primata        | Cebidae         | Callithrix jacchus       | 5.67  | 6.12 | 0.693147181  | 5.31 | 5.25  | 13.31 | 7  | Platyrrhini              | 21.4 | 0.3271 | 326 |
| Rodentia       | Sciuridae       | Callosciurus erythraeus  | 5.65  | 5.77 | 0.693147181  | 5.26 | 5.52  | 14.67 | 8  | Glires                   | 79   | 0.1013 | 322 |
| Rodentia       | Muridae         | Calomyscus sp            | 5.63  | 5.90 | 0.064232526  | 5.03 | 5.47  | 13.49 | 14 | Muroidea                 | 30   | 0.4667 | 335 |
| Carnivora      | Canidae         | Canis lupus              | 10.37 | 6.52 | 0.693147181  | 5.87 | 10.41 | 17.74 | 6  | Canidae                  | 12   | 0.5000 | 328 |
| Rodentia       | Castoridae      | Castor fiber             | 9.85  | 6.94 | 0            | 5.70 | 10.33 | 14.89 | 22 | Glires                   | 79   | 0.2785 | 322 |
| Primata        | Cebidae         | Cebus apella             | 7.92  | 7.47 | -0.597837001 | 6.29 | 8.15  | 16.19 | 3  | Platyrrhini              | 21.4 | 0.1402 | 326 |
| Primata        | Cebidae         | Cebus capucinus          | 8.01  | 7.67 | -0.776528789 | 6.49 | 8.20  | 12.97 | 3  | Platyrrhini              | 21.4 | 0.1402 | 326 |
| Primata        | Cebidae         | Cebus nigrivittatus      | 7.96  | 7.67 | -0.515237412 | 6.27 | 8.26  | 13.02 | 3  | Platyrrhini              | 21.4 | 0.1402 | 326 |
| Perissodactyla | Rhinocerotidae  | Ceratotherium simum      | 14.64 | 7.92 | -0.867500568 | 6.40 | 12.09 | 14.97 | 1  | Tapiridae-Rhinocerotidae | 48.6 | 0.0206 | 341 |
| Carnivora      | Canidae         | Cerdocyon thous          | 8.66  | 5.63 | 0.641853886  | 4.93 | 8.63  | 15.77 | 7  | Canidae                  | 12   | 0.5833 | 328 |
| Primata        | Pitheciidae     | Chiropotes utahickae     | 7.96  | 6.57 | 0.009256314  | 5.29 | 7.95  | 11.74 | 4  | Platyrrhini              | 21.4 | 0.1869 | 326 |
| Primata        | Cercopithecidae | Colobus guereza          | 9.20  | 7.56 | -0.527632742 | 5.68 | 9.27  | 15.20 | 5  | Cercopithecidae          | 29.6 | 0.1689 | 324 |
| Carnivora      | Mephitidae      | Conepatus leuconotus     | 8.10  | 5.83 | 0.693147181  | 4.43 | 7.83  | 14.74 | 18 | Carnivora                | 60   | 0.3000 | 434 |
| Rodentia       | Cricetidae      | Cricetulus barabensis    | 3.13  | 4.03 | 1.165968815  | 4.15 | 3.20  | 15.06 | 22 | Muroidea                 | 30   | 0.7333 | 335 |
| Rodentia       | Cricetidae      | Cricetulus longicaudatus | 3.10  | 4.22 | 0.986976827  | 3.92 | 3.24  | 14.56 | 20 | Muroidea                 | 30   | 0.6667 | 335 |
| Rodentia       | Cricetidae      | Cricetulus migratorius   | 3.42  | 5.00 | 0.693147181  | 3.86 | 3.08  | 16.15 | 21 | Muroidea                 | 30   | 0.7000 | 335 |
| Rodentia       | Cricetidae      | Cricetulus sokolovi      | 4.58  | 5.55 | 0.527653033  | 4.18 | 4.58  | 13.02 | 24 | Muroidea                 | 30   | 0.8000 | 335 |
| Rodentia       | Cricetidae      | Cricetus cricetus        | 6.06  | 4.46 | 0.693147181  | 3.87 | 5.89  | 15.72 | 21 | Muroidea                 | 30   | 0.7000 | 335 |
| Carnivora      | Hyaenidae       | Crocuta crocuta          | 11.06 | 6.67 | 0            | 6.20 | 10.96 | 16.51 | 10 | Carnivora                | 60   | 0.1667 | 434 |
| Carnivora      | Canidae         | Cuon alpinus             | 9.67  | 5.92 | 0            | 5.26 | 9.70  | 16.17 | 6  | Canidae                  | 12   | 0.5000 | 328 |
| Chiroptera     | Phyllostomidae  | Desmodus rotundus        | 3.50  | 6.46 | 0.231111721  | 5.46 | 3.38  | 16.69 | 10 | Phyllostomidae           | 37.5 | 0.2667 | 338 |
| Chiroptera     | Phyllostomidae  | Diaemus youngi           | 3.60  | 5.85 | 0            | 4.81 | 3.61  | 16.42 | 10 | Phyllostomidae           | 37.5 | 0.2667 | 338 |
| Perissodactyla | Rhinocerotidae  | Dicerorhinus sumatrensis | 13.86 | 7.93 | -1.237874356 | 6.04 | 11.93 | 13.29 | 1  | Tapiridae-Rhinocerotidae | 48.6 | 0.0206 | 341 |
| Perissodactyla | Rhinocerotidae  | Diceros bicornis         | 13.81 | 7.70 | -0.94160854  | 6.34 | 12.08 | 16.25 | 1  | Tapiridae-Rhinocerotidae | 48.6 | 0.0206 | 341 |
| Chiroptera     | Phyllostomidae  | Diphylla ecaudata        | 3.34  | 5.81 | 0            | 4.56 | 3.33  | 15.90 | 9  | Phyllostomidae           | 37.5 | 0.2400 | 338 |
| Rodentia       | Gliridae        | Eliomys melanurus        | 4.61  | 4.84 | 0.693147181  | 4.19 | 4.48  | 12.65 | 2  | Eliomys                  | 3.5  | 0.5714 | 337 |
| Rodentia       | Gliridae        | Eliomys munbyanus        | 4.90  | 5.89 | 0.006931472  | 4.03 | 4.86  | 9.73  | 1  | Eliomys                  | 3.5  | 0.2857 | 337 |
| Rodentia       | Gliridae        | Eliomys quercinus        | 4.74  | 6.34 | 0            | 4.19 | 4.89  | 15.17 | 2  | Eliomys                  | 3.5  | 0.5714 | 337 |

|                 |                |                               |       |      |              |      |       |       |    |                           |      |        |     |
|-----------------|----------------|-------------------------------|-------|------|--------------|------|-------|-------|----|---------------------------|------|--------|-----|
| Chiroptera      | Pteropodidae   | Eonycteris spelaea            | 4.07  | 5.88 | 0.693147181  | 4.09 | 3.94  | 15.17 | 9  | Chiroptera                | 70   | 0.1286 | 344 |
| Perissodactyla  | Equidae        | Equus ferus                   | 12.91 | 6.73 | 0            | 6.61 | 11.76 | 13.33 | 1  | Equus                     | 4    | 0.2500 | 341 |
| Perissodactyla  | Equidae        | Equus grevyi                  | 12.92 | 7.20 | -0.693147181 | 5.74 | 11.93 | 12.17 | 3  | Equus                     | 4    | 0.7500 | 341 |
| Perissodactyla  | Equidae        | Equus hemionus                | 12.37 | 7.08 | -0.400477567 | 6.14 | 11.96 | 14.10 | 9  | Equus                     | 4    | 2.2500 | 341 |
| Perissodactyla  | Equidae        | Equus kiang                   | 12.55 | 7.57 | -0.693147181 | 5.77 | 11.83 | 13.20 | 7  | Equus                     | 4    | 1.7500 | 341 |
| Perissodactyla  | Equidae        | Equus quagga                  | 12.90 | 7.48 | -0.510825624 | 5.48 | 11.95 | 12.92 | 5  | Equus                     | 4    | 1.2500 | 341 |
| Perissodactyla  | Equidae        | Equus zebra                   | 12.55 | 6.87 | -1.049822124 | 5.66 | 11.87 | 11.88 | 4  | Equus                     | 4    | 1.0000 | 341 |
| Carnivora       | Felidae        | Felis catus                   | 7.97  | 5.69 | 0.699055845  | 6.01 | 7.91  | 15.48 | 4  | Carnivora                 | 60   | 0.0667 | 340 |
| Carnivora       | Heupleridae    | Fossa fossana                 | 7.53  | 6.28 | 0.006731325  | 4.88 | 7.62  | 11.58 | 5  | Carnivora                 | 60   | 0.0833 | 434 |
| Lorisiformes    | Galagidae      | Galago moholi                 | 5.26  | 6.04 | 0.693147181  | 5.29 | 5.39  | 15.46 | 11 | Lorisiformes              | 34.2 | 0.3216 | 332 |
| Dermoptera      | Cynocephalidae | Galeopterus variegatus        | 7.01  | 5.84 | 0.627801965  | 1.24 | 6.96  | 14.15 | 21 | Tupaiaidae-Cynocephalidae | 80   | 0.2625 | 332 |
| Cetartiodactyla | Giraffidae     | Giraffa camelopardalis        | 13.78 | 7.40 | 0            | 6.08 | 12.21 | 14.84 | 13 | Giraffidae                | 29.4 | 0.4422 | 336 |
| Chiroptera      | Phyllostomidae | Glossophaga soricina          | 2.30  | 5.31 | 0.693147181  | 4.79 | 2.17  | 16.55 | 3  | Phyllostomidae            | 37.5 | 0.0800 | 338 |
| Carnivora       | Ursidae        | Helarctos malayanus           | 10.95 | 6.76 | -0.038470359 | 5.70 | 10.57 | 14.74 | 21 | Carnivora                 | 60   | 0.3500 | 340 |
| Rodentia        | Bathyergidae   | Heliophobius argenteocinereus | 5.07  | 5.33 | 0.405465108  | 3.62 | 4.48  | 14.61 | 16 | Bathyergidae              | 38   | 0.4211 | 327 |
| Eulipotyphla    | Erinacenaidae  | Hemiechinus auritus           | 5.77  | 5.89 | 0            | 4.40 | 5.99  | 15.99 | 13 | Eulipotyphla              | 73   | 0.1781 | 325 |
| Carnivora       | Herpestidae    | Herpestes javanicus           | 6.62  | 5.12 | 0.693147181  | 4.79 | 6.66  | 15.74 | 8  | Carnivora                 | 60   | 0.1333 | 434 |
| Cetartiodactyla | Hippopotamidae | Hippopotamus amphibius        | 14.24 | 7.62 | 0            | 6.48 | 12.00 | 14.43 | 26 | Delphi-Hippopo            | 50   | 0.5200 | 336 |
| Chiroptera      | Hipposideridae | Hipposideros larvatus         | 2.99  | 5.85 | 0            | 4.77 | 3.10  | 15.15 | 15 | Chiroptera                | 70   | 0.2143 | 344 |
| Primata         | Hylobatidae    | Hylobates lar                 | 8.63  | 8.26 | -0.798507696 | 6.17 | 8.80  | 12.96 | 16 | Hylobatidae               | 18.8 | 0.8511 | 331 |
| Primata         | Atelidae       | Lagothrix lagotricha          | 8.74  | 7.46 | -0.693147181 | 5.89 | 9.21  | 13.59 | 6  | Platyrrhini               | 21.4 | 0.2804 | 326 |
| Primata         | Cebidae        | Leontopithecus chrysomelas    | 6.35  | 6.51 | 0.235275841  | 5.54 | 6.31  | 10.43 | 6  | Platyrrhini               | 21.4 | 0.2804 | 326 |
| Rodentia        | Muridae        | Leopoldamys edwardsi          | 5.73  | 5.91 | 0.017917595  | 4.48 | 5.67  | 14.13 | 4  | Rattini                   | 8.4  | 0.4762 | 323 |
| Lagomorpha      | Leporidae      | Lepus timidus                 | 8.04  | 5.56 | 1.098612289  | 5.38 | 7.92  | 16.81 | 8  | Lagomorpha                | 39.6 | 0.2020 | 322 |
| Proboscidea     | Elephantidae   | Loxodonta africana            | 15.16 | 8.51 | -1.560647748 | 6.87 | 12.44 | 15.26 | 10 | Paengulate                | 62   | 0.1613 | 333 |
| Rodentia        | Sciuridae      | Marmota baibacina             | 8.92  | 6.27 | 0            | 5.04 | 8.63  | 13.52 | 4  | Sciuridae                 | 51.5 | 0.0777 | 322 |
| Rodentia        | Sciuridae      | Marmota himalayana            | 8.52  | 6.35 | 0.036537068  | 5.02 | 8.33  | 14.10 | 4  | Sciuridae                 | 51.5 | 0.0777 | 322 |
| Carnivora       | Mustelidae     | Martes flavigula              | 7.83  | 7.14 | 0.67676064   | 5.12 | 7.87  | 15.48 | 6  | Carnivora                 | 60   | 0.1000 | 434 |
| Carnivora       | Mustelidae     | Martes foina                  | 7.42  | 6.61 | 0            | 5.38 | 7.57  | 15.76 | 8  | Carnivora                 | 60   | 0.1333 | 434 |
| Rodentia        | Muridae        | Maxomys surifer               | 5.01  | 5.32 | 0.631914086  | 3.74 | 4.74  | 14.83 | 5  | Rattini                   | 8.4  | 0.5952 | 323 |
| Chiroptera      | Megadermatidae | Megaderma spasma              | 3.21  | 5.43 | 0.551887528  | 4.37 | 3.29  | 15.64 | 14 | Chiroptera                | 70   | 0.2000 | 344 |
| Carnivora       | Mustelidae     | Meles meles                   | 9.38  | 6.04 | -0.287682072 | 5.27 | 9.36  | 15.09 | 5  | Carnivora                 | 60   | 0.0833 | 434 |
| Carnivora       | Mustelidae     | Melogale moschata             | 6.84  | 5.79 | 0.702693801  | 4.84 | 7.03  | 14.21 | 2  | Carnivora                 | 60   | 0.0333 | 434 |
| Rodentia        | Sciuridae      | Menetes berdmorei             | 5.25  | 5.92 | 0            | 3.94 | 5.33  | 13.81 | 7  | Glires                    | 79   | 0.0886 | 334 |
| Carnivora       | Mephitidae     | Mephitis macroura             | 7.00  | 5.87 | 0.042121276  | 4.62 | 6.89  | 14.40 | 15 | Carnivora                 | 60   | 0.2500 | 434 |
| Carnivora       | Mephitidae     | Mephitis mephitis             | 7.78  | 5.87 | 0.693147181  | 5.04 | 7.78  | 16.32 | 15 | Carnivora                 | 60   | 0.2500 | 434 |
| Rodentia        | Cricetidae     | Mesocricetus auratus          | 4.59  | 3.93 | 1.386294361  | 4.79 | 4.61  | 13.72 | 24 | Muroidea                  | 30   | 0.8000 | 335 |

|                 |                  |                          |       |      |              |      |       |       |    |                   |      |        |     |
|-----------------|------------------|--------------------------|-------|------|--------------|------|-------|-------|----|-------------------|------|--------|-----|
| Rodentia        | Cricetidae       | Mesocricetus brandti     | 5.29  | 3.76 | 1.098612289  | 3.97 | 4.88  | 13.73 | 25 | Muroidea          | 30   | 0.8333 | 335 |
| Rodentia        | Cricetidae       | Mesocricetus newtoni     | 4.58  | 4.55 | 1.165409294  | 4.14 | 4.57  | 11.56 | 27 | Muroidea          | 30   | 0.9000 | 335 |
| Rodentia        | Cricetidae       | Mesocricetus raddei      | 4.33  | 4.54 | 0.693147181  | 3.88 | 4.37  | 11.93 | 24 | Muroidea          | 30   | 0.8000 | 335 |
| Rodentia        | Cricetidae       | Microtus agrestis        | 3.58  | 3.64 | 1.252762968  | 3.68 | 3.24  | 16.09 | 4  | Microtus          | 5.27 | 0.7590 | 330 |
| Rodentia        | Cricetidae       | Microtus arvalis         | 3.29  | 3.34 | 1.791759469  | 3.58 | 3.09  | 15.87 | 4  | Microtus          | 5.27 | 0.7590 | 330 |
| Rodentia        | Cricetidae       | Microtus dogramacii      | 4.90  | 5.89 | 0.006931472  | 4.03 | 4.86  | 9.73  | 3  | Microtus          | 5.27 | 0.5693 | 330 |
| Rodentia        | Cricetidae       | Microtus gregalis        | 3.86  | 4.03 | 1.011600912  | 3.27 | 3.80  | 15.09 | 7  | Microtus          | 5.27 | 1.3283 | 330 |
| Rodentia        | Cricetidae       | Microtus maximowiczii    | 3.23  | 4.61 | 0.85761328   | 3.54 | 3.23  | 14.34 | 9  | Microtus          | 5.27 | 1.7078 | 330 |
| Rodentia        | Cricetidae       | Microtus oeconomus       | 3.50  | 3.80 | 1.252762968  | 3.07 | 3.52  | 16.78 | 12 | Microtus          | 5.27 | 2.2770 | 330 |
| Rodentia        | Cricetidae       | Microtus socialis        | 3.87  | 3.89 | 1.609437912  | 3.60 | 3.77  | 14.60 | 3  | Microtus          | 5.27 | 0.5693 | 330 |
| Cetartiodactyla | Moschidae        | Moschus moschiferus      | 9.50  | 6.19 | 0            | 4.97 | 9.59  | 15.96 | 2  | Moschidae-Bovidae | 26.2 | 0.0763 | 336 |
| Cetartiodactyla | Moschidae        | Muntiacus reevesi        | 9.51  | 5.69 | 0.405465108  | 5.46 | 9.92  | 14.39 | 19 | Moschidae-Bovidae | 26.2 | 0.7252 | 336 |
| Rodentia        | Muridae          | Mus mattheyi             | 4.52  | 5.88 | 0.002870569  | 3.97 | 4.69  | 8.19  | 14 | Mus               | 11.4 | 1.2281 | 342 |
| Rodentia        | Muridae          | Mus minutoides           | 1.86  | 4.05 | 1.386294361  | 3.62 | 2.07  | 14.31 | 14 | Mus               | 11.4 | 1.2281 | 342 |
| Rodentia        | Muridae          | Mus musculus             | 2.96  | 4.17 | 1.504077397  | 4.28 | 3.58  | 13.77 | 22 | Mus               | 11.4 | 1.9298 | 342 |
| Rodentia        | Muridae          | Mus pahari               | 3.25  | 5.78 | 0            | 4.66 | 3.33  | 14.07 | 3  | Mus               | 11.4 | 0.2632 | 342 |
| Rodentia        | Muridae          | Mus platythrix           | 3.37  | 5.37 | 0.146998474  | 3.96 | 3.30  | 11.69 | 29 | Mus               | 11.4 | 2.5439 | 342 |
| Carnivora       | Mustelidae       | Mustela altaica          | 5.19  | 5.52 | 0.100303673  | 3.99 | 5.63  | 15.85 | 8  | Carnivora         | 60   | 0.1333 | 434 |
| Carnivora       | Mustelidae       | Mustela eversmannii      | 7.43  | 5.79 | 0            | 4.69 | 7.36  | 16.62 | 11 | Carnivora         | 60   | 0.1833 | 434 |
| Carnivora       | Mustelidae       | Mustela nivalis          | 4.36  | 5.14 | 0            | 4.79 | 4.34  | 17.59 | 9  | Carnivora         | 60   | 0.1500 | 434 |
| Carnivora       | Mustelidae       | Mustela putorius         | 6.88  | 5.73 | 0            | 5.12 | 6.94  | 15.84 | 12 | Carnivora         | 60   | 0.2000 | 434 |
| Chiroptera      | Vespertilionidae | Myotis goudoti           | 1.72  | 5.77 | 0.023150076  | 4.67 | 2.44  | 12.66 | 3  | Chiroptera        | 70   | 0.0429 | 344 |
| Chiroptera      | Vespertilionidae | Myotis myotis            | 3.24  | 5.99 | 0            | 5.58 | 3.40  | 15.13 | 3  | Chiroptera        | 70   | 0.0429 | 344 |
| Chiroptera      | Myzopodidae      | Myzopoda aurita          | 2.21  | 5.81 | -0.000779615 | 4.02 | 2.48  | 11.77 | 14 | Chiroptera        | 70   | 0.2000 | 344 |
| Carnivora       | Nandiniidae      | Nandinia binotata        | 7.68  | 6.92 | 0.693147181  | 5.40 | 8.05  | 15.60 | 2  | Carnivora         | 60   | 0.0333 | 434 |
| Primata         | Cercopithecidae  | Nasalis larvatus         | 9.41  | 7.55 | -0.400477567 | 5.53 | 9.28  | 13.26 | 5  | Cercopithecidae   | 29.6 | 0.1689 | 324 |
| Carnivora       | Felidae          | Neofelis nebulosa        | 9.61  | 6.62 | -0.00374404  | 5.32 | 8.96  | 14.88 | 4  | Carnivora         | 60   | 0.0667 | 340 |
| Eulipotyphla    | Erinacenaidae    | Neovison vison           | 7.00  | 5.83 | 0            | 4.92 | 5.13  | 16.40 | 13 | Eulipotyphla      | 73   | 0.1781 | 325 |
| Rodentia        | Muridae          | Niviventer fulvescens    | 4.40  | 4.50 | 1.126753433  | 4.16 | 4.47  | 15.06 | 6  | Rattini           | 8.4  | 0.7143 | 323 |
| Primata         | Hylobatidae      | Nomascus leucogenys      | 8.90  | 6.79 | -0.082155942 | 5.61 | 8.75  | 12.18 | 27 | Hylobatidae       | 18.8 | 1.4362 | 331 |
| Carnivora       | Canidae          | Nyctereutes procyonoides | 8.35  | 5.79 | 0            | 5.12 | 8.35  | 15.72 | 11 | Canidae           | 12   | 0.9167 | 328 |
| Lorisiformes    | Lorisidae        | Nycticebus coucang       | 6.83  | 6.49 | 0            | 5.76 | 6.87  | 14.22 | 5  | Lorisiformes      | 34.2 | 0.1462 | 332 |
| Lagomorpha      | Ochotonidae      | Ochotona forresti        | 4.83  | 5.26 | 0.602277724  | 3.79 | 4.59  | 12.65 | 10 | Lagomorpha        | 39.6 | 0.2525 | 322 |
| Lagomorpha      | Ochotonidae      | Ochotona hyperborea      | 4.79  | 5.73 | 0            | 3.58 | 4.80  | 16.14 | 11 | Lagomorpha        | 39.6 | 0.2778 | 322 |
| Cetartiodactyla | Giraffidae       | Okapia johnstoni         | 12.35 | 6.85 | 0            | 5.98 | 11.70 | 13.92 | 15 | Giraffidae        | 29.4 | 0.5102 | 336 |
| Rodentia        | Cricetidae       | Oligoryzomys flavescens  | 3.22  | 5.00 | 0.414078113  | 4.01 | 3.37  | 14.64 | 7  | Muroidea          | 30   | 0.2333 | 329 |
| Lagomorpha      | Leporidae        | Oryctolagus cuniculus    | 7.37  | 5.22 | 1.504077397  | 5.38 | 7.21  | 14.65 | 8  | Lagomorpha        | 39.6 | 0.2020 | 322 |

|                 |                 |                            |       |      |              |      |       |       |    |                          |      |        |     |
|-----------------|-----------------|----------------------------|-------|------|--------------|------|-------|-------|----|--------------------------|------|--------|-----|
| Lorisiformes    | Galagidae       | Otolemur crassicaudatus    | 7.10  | 6.41 | 0            | 5.42 | 6.88  | 15.23 | 2  | Lorisiformes             | 34.2 | 0.0585 | 332 |
| Lorisiformes    | Galagidae       | Otolemur garnettii         | 6.70  | 6.38 | 0.3074847    | 5.32 | 6.69  | 13.57 | 2  | Lorisiformes             | 34.2 | 0.0585 | 332 |
| Carnivora       | Viverridae      | Paguma larvata             | 8.37  | 6.66 | 0.693147181  | 5.38 | 8.34  | 15.51 | 3  | Carnivora                | 60   | 0.0500 | 434 |
| Carnivora       | Felidae         | Panthera leo               | 11.97 | 6.90 | 0.693147181  | 5.89 | 11.96 | 16.23 | 4  | Carnivora                | 60   | 0.0667 | 340 |
| Carnivora       | Viverridae      | Paradoxurus hermaphroditus | 8.07  | 5.99 | 0.693147181  | 5.59 | 8.07  | 15.77 | 2  | Carnivora                | 60   | 0.0333 | 434 |
| Cetartiodactyla | Tayassuidae     | Pecari tajacu              | 9.96  | 5.75 | 0.693147181  | 5.69 | 9.80  | 16.57 | 54 | Tayassuidae              | 42.8 | 1.2617 | 336 |
| Rodentia        | Cricetidae      | Peromyscus eremicus        | 3.12  | 3.99 | 1.098612289  | 4.49 | 3.07  | 12.54 | 6  | Muroidea                 | 30   | 0.2000 | 335 |
| Rodentia        | Sciuridae       | Petaurista albiventer      | 7.31  | 6.47 | 0.023372621  | 5.55 | 7.66  | 14.02 | 7  | Glires                   | 79   | 0.0886 | 322 |
| Rodentia        | Cricetidae      | Phodopus campbelli         | 3.30  | 3.84 | 1.252762968  | 3.07 | 3.45  | 14.53 | 32 | Muroidea                 | 30   | 1.0667 | 335 |
| Rodentia        | Cricetidae      | Phodopus roborovskii       | 2.93  | 3.06 | 1.252762968  | 4.05 | 3.24  | 14.89 | 29 | Muroidea                 | 30   | 0.9667 | 335 |
| Rodentia        | Cricetidae      | Phodopus sungorus          | 3.42  | 4.35 | 1.098612289  | 3.65 | 3.58  | 13.38 | 32 | Muroidea                 | 30   | 1.0667 | 335 |
| Primata         | Pitheciidae     | Pithecia irrorata          | 7.74  | 6.46 | 0.204760981  | 5.33 | 7.72  | 13.94 | 2  | Platyrrhini              | 21.4 | 0.0935 | 326 |
| Primata         | Cercopithecidae | Presbytis comata           | 8.79  | 7.47 | -0.699163905 | 5.83 | 8.60  | 10.65 | 3  | Cercopithecidae          | 29.6 | 0.1014 | 324 |
| Hyracoidea      | Procaviidae     | Procavia capensis          | 7.99  | 6.19 | 0            | 5.12 | 7.75  | 17.00 | 6  | Paengulate               | 62   | 0.0968 | 333 |
| Lagomorpha      | Leporidae       | Pronolagus rupestris       | 7.72  | 5.74 | 0.755437627  | 4.80 | 7.64  | 14.14 | 13 | Lagomorpha               | 39.6 | 0.3283 | 322 |
| Primata         | Cercopithecidae | Pygathrix nemaeus          | 9.15  | 7.28 | 0            | 5.70 | 8.85  | 11.92 | 2  | Cercopithecidae          | 29.6 | 0.0676 | 324 |
| Rodentia        | Muridae         | Rattus exulans             | 3.92  | 4.05 | 1.360976553  | 3.70 | 4.05  | 14.45 | 10 | Rattini                  | 8.4  | 1.1905 | 323 |
| Rodentia        | Muridae         | Rattus losea               | 4.65  | 5.10 | 0.702999259  | 4.12 | 4.66  | 12.81 | 10 | Rattini                  | 8.4  | 1.1905 | 323 |
| Rodentia        | Muridae         | Rattus norvegicus          | 5.65  | 4.01 | 1.252762968  | 3.82 | 5.29  | 13.72 | 10 | Rattini                  | 8.4  | 1.1905 | 323 |
| Rodentia        | Muridae         | Rattus rattus              | 4.96  | 4.75 | 1.32175584   | 3.92 | 4.82  | 14.13 | 12 | Rattini                  | 8.4  | 1.4286 | 323 |
| Rodentia        | Muridae         | Rattus tanezumi            | 4.95  | 5.61 | 0.655763389  | 4.46 | 4.96  | 11.08 | 10 | Rattini                  | 8.4  | 1.1905 | 323 |
| Perissodactyla  | Rhinocerotidae  | Rhinoceros unicornis       | 14.43 | 7.63 | -1.203972804 | 6.38 | 11.93 | 10.12 | 1  | Tapiridae-Rhinocerotidae | 48.6 | 0.0206 | 341 |
| Chiroptera      | Rhinolopodidae  | Rhinolophus pearsonii      | 2.45  | 5.81 | 0            | 4.80 | 2.52  | 15.05 | 15 | Chiroptera               | 70   | 0.2143 | 344 |
| Chiroptera      | Rhinolopodidae  | Rhinolophus sinicus        | 5.54  | 5.83 | 0.621031978  | 4.54 | 5.50  | 14.68 | 19 | Chiroptera               | 70   | 0.2714 | 344 |
| Chiroptera      | Pteropodidae    | Rousettus leschenaultii    | 4.44  | 5.78 | 0.693147181  | 4.66 | 4.52  | 15.46 | 9  | Chiroptera               | 70   | 0.1286 | 344 |
| Primata         | Cebidae         | Saguinus oedipus           | 6.14  | 6.52 | 0            | 5.62 | 5.82  | 10.84 | 6  | Platyrrhini              | 21.4 | 0.2804 | 326 |
| Primata         | Cebidae         | Saimiri sciureus           | 6.62  | 7.24 | 0.285178942  | 5.78 | 6.75  | 14.97 | 1  | Platyrrhini              | 21.4 | 0.0467 | 326 |
| Rodentia        | Sciuridae       | Sciurus carolinensis       | 6.30  | 5.82 | 0.693147181  | 5.66 | 6.09  | 15.22 | 8  | Glires                   | 79   | 0.1013 | 322 |
| Rodentia        | Sciuridae       | Sciurus vulgaris           | 5.81  | 5.89 | 0.693147181  | 4.97 | 5.82  | 16.69 | 8  | Glires                   | 79   | 0.1013 | 322 |
| Primata         | Cercopithecidae | Semnopithecus entellus     | 9.45  | 7.31 | -0.400477567 | 5.70 | 9.34  | 14.23 | 3  | Cercopithecidae          | 29.6 | 0.1014 | 324 |
| Rodentia        | Cricetidae      | Sigmodon arizonae          | 5.29  | 5.61 | 0.51360325   | 4.05 | 5.27  | 12.76 | 7  | Sygodon                  | 9.42 | 0.7431 | 339 |
| Rodentia        | Cricetidae      | Sigmodon fulviventris      | 5.28  | 4.65 | 1.084500461  | 3.75 | 4.93  | 13.22 | 10 | Sygodon                  | 9.42 | 1.0616 | 339 |
| Rodentia        | Cricetidae      | Sigmodon mascotensis       | 4.79  | 5.15 | 0.818451892  | 3.98 | 4.76  | 12.44 | 8  | Sygodon                  | 9.42 | 0.8493 | 339 |
| Eulipotyphla    | Soricidae       | Sorex araneus              | 2.22  | 5.75 | 0.693147181  | 3.18 | 2.09  | 16.48 | 30 | Eulipotyphla             | 73   | 0.4110 | 325 |
| Eulipotyphla    | Soricidae       | Sorex granarius            | 1.85  | 5.42 | 0.528694159  | 3.13 | 2.09  | 11.16 | 30 | Eulipotyphla             | 73   | 0.4110 | 325 |
| Eulipotyphla    | Soricidae       | Sorex minutus              | 1.46  | 5.87 | 0.405465108  | 3.18 | 1.44  | 16.55 | 36 | Eulipotyphla             | 73   | 0.4932 | 325 |
| Rodentia        | Sciuridae       | Spermophilus erythrognys   | 5.87  | 5.86 | 0            | 4.04 | 5.84  | 14.10 | 9  | Sciuridae                | 51.5 | 0.1748 | 322 |

|                 |                 |                          |       |      |              |      |       |       |    |                           |      |        |     |
|-----------------|-----------------|--------------------------|-------|------|--------------|------|-------|-------|----|---------------------------|------|--------|-----|
| Rodentia        | Sciuridae       | Spermophilus major       | 6.26  | 5.92 | 0            | 4.23 | 6.36  | 13.34 | 9  | Sciuridae                 | 51.5 | 0.1748 | 322 |
| Rodentia        | Sciuridae       | Spermophilus suslicus    | 5.53  | 5.38 | 0            | 3.86 | 5.50  | 13.68 | 10 | Sciuridae                 | 51.5 | 0.1942 | 322 |
| Rodentia        | Sciuridae       | Spermophilus undulatus   | 6.61  | 5.93 | 0            | 4.17 | 6.52  | 14.70 | 11 | Sciuridae                 | 51.5 | 0.2136 | 322 |
| Carnivora       | Mephitidae      | Spilogale gracilis       | 6.15  | 5.80 | 0.552943596  | 5.06 | 6.37  | 15.16 | 21 | Carnivora                 | 60   | 0.3500 | 434 |
| Cetartiodactyla | Suidae          | Sus scrofa               | 11.34 | 5.86 | 0.405465108  | 5.53 | 10.61 | 17.07 | 10 | Suidae                    | 42.8 | 0.2336 | 336 |
| Lagomorpha      | Leporidae       | Sylvilagus floridanus    | 7.10  | 4.66 | 1.570697084  | 4.68 | 6.85  | 15.79 | 11 | Lagomorpha                | 39.6 | 0.2778 | 322 |
| Chiroptera      | Molossidae      | Tadarida teniotis        | 3.33  | 5.92 | 0            | 5.05 | 3.37  | 15.37 | 1  | Chiroptera                | 70   | 0.0143 | 344 |
| Eulipotyphla    | Talpidae        | Talpa altaica            | 4.44  | 5.86 | -0.198450939 | 4.74 | 4.57  | 14.88 | 6  | Eulipotyphla              | 73   | 0.0822 | 325 |
| Eulipotyphla    | Talpidae        | Talpa europaea           | 4.47  | 5.82 | 0            | 4.43 | 4.47  | 15.78 | 6  | Eulipotyphla              | 73   | 0.0822 | 325 |
| Rodentia        | Sciuridae       | Tamias sibiricus         | 4.54  | 5.86 | 0            | 4.75 | 4.52  | 16.44 | 8  | Glires                    | 79   | 0.1013 | 322 |
| Chiroptera      | Emballonuridae  | Taphozous melanopogon    | 3.26  | 5.93 | 0            | 5.32 | 3.37  | 15.79 | 10 | Chiroptera                | 70   | 0.1429 | 344 |
| Perissodactyla  | Tapiridae       | Tapirus bairdii          | 12.59 | 6.57 | -0.342490309 | 5.77 | 11.59 | 12.15 | 5  | Tapiridae-Rhinocerotidae  | 48.6 | 0.1029 | 341 |
| Perissodactyla  | Tapiridae       | Tapirus indicus          | 12.65 | 7.03 | -0.693147181 | 5.89 | 11.82 | 13.59 | 4  | Tapiridae-Rhinocerotidae  | 48.6 | 0.0823 | 341 |
| Perissodactyla  | Tapiridae       | Tapirus pinchaque        | 11.96 | 7.02 | -0.549027923 | 5.83 | 11.75 | 12.09 | 3  | Tapiridae-Rhinocerotidae  | 48.6 | 0.0617 | 341 |
| Perissodactyla  | Tapiridae       | Tapirus terrestris       | 12.04 | 6.76 | -0.168714503 | 6.04 | 11.75 | 16.43 | 2  | Tapiridae-Rhinocerotidae  | 48.6 | 0.0412 | 341 |
| Rodentia        | Cricetidae      | Thaptomys nigrita        | 2.99  | 5.88 | 0            | 3.93 | 3.17  | 13.49 | 5  | Muroidea                  | 30   | 0.1667 | 329 |
| Primata         | Cercopithecidae | Trachypithecus cristatus | 8.88  | 7.45 | -0.427421655 | 5.92 | 8.76  | 13.63 | 4  | Cercopithecidae           | 29.6 | 0.1351 | 324 |
| Primata         | Cercopithecidae | Trachypithecus francoisi | 9.00  | 7.42 | -0.441688992 | 5.75 | 9.08  | 12.65 | 4  | Cercopithecidae           | 29.6 | 0.1351 | 324 |
| Primata         | Cercopithecidae | Trachypithecus phayrei   | 8.95  | 7.37 | -0.223143551 | 5.83 | 9.01  | 14.09 | 4  | Cercopithecidae           | 29.6 | 0.1351 | 324 |
| Cetartiodactyla | Tragulidae      | Tragulus javanicus       | 7.54  | 5.06 | 0.875468737  | 4.97 | 7.39  | 13.76 | 21 | Tragulidae                | 46.3 | 0.4536 | 336 |
| Carnivora       | Ursidae         | Tremarctos ornatus       | 11.72 | 6.88 | -0.10724351  | 6.08 | 10.83 | 12.92 | 33 | Carnivora                 | 60   | 0.5500 | 340 |
| Rodentia        | Cricetidae      | Tscherskia triton        | 3.22  | 4.69 | 0.855195849  | 4.02 | 3.58  | 14.60 | 34 | Muroidea                  | 30   | 1.1333 | 335 |
| Scandentia      | Tupaiaidae      | Tupaia belangeri         | 5.30  | 4.68 | 2.014903021  | 4.79 | 5.23  | 14.84 | 16 | Tupaiaidae-Cynocephalidae | 80   | 0.2000 | 332 |
| Scandentia      | Tupaiaidae      | Tupaia minor             | 4.25  | 5.89 | 0.027472709  | 4.99 | 4.72  | 14.07 | 17 | Tupaiaidae-Cynocephalidae | 80   | 0.2125 | 332 |
| Carnivora       | Canidae         | Urocyon cinereoargenteus | 8.25  | 5.86 | -0.020202707 | 5.19 | 8.26  | 16.01 | 9  | Canidae                   | 12   | 0.7500 | 328 |
| Carnivora       | Viverridae      | Viverricula indica       | 7.98  | 5.89 | 0.671586997  | 4.84 | 7.94  | 15.91 | 6  | Carnivora                 | 60   | 0.1000 | 434 |
| Carnivora       | Canidae         | Vulpes corsac            | 7.87  | 6.93 | 0            | 5.05 | 7.90  | 15.67 | 22 | Canidae                   | 12   | 1.8333 | 328 |
| Carnivora       | Canidae         | Vulpes lagopus           | 8.62  | 6.04 | 0            | 4.79 | 8.53  | 14.67 | 8  | Canidae                   | 12   | 0.6667 | 328 |
| Carnivora       | Canidae         | Vulpes velox             | 7.64  | 6.15 | 0            | 5.48 | 7.64  | 13.42 | 16 | Canidae                   | 12   | 1.3333 | 328 |
| Carnivora       | Canidae         | Vulpes vulpes            | 8.48  | 5.77 | -0.094310679 | 5.19 | 8.32  | 17.96 | 23 | Canidae                   | 12   | 1.9167 | 328 |
| Carnivora       | Canidae         | Vulpes zerda             | 7.18  | 5.68 | 0            | 5.16 | 7.17  | 15.76 | 9  | Canidae                   | 12   | 0.7500 | 328 |
| Rodentia        | Sciuridae       | Xerus erythropus         | 6.40  | 5.35 | 0.722831892  | 4.28 | 6.59  | 15.87 | 7  | Glires                    | 79   | 0.0886 | 322 |

**Table S3.** Families and variables utilised in the phylogenetic generalized least squares regression (PGLS) of rate of macrostructural karyotypic diversification (rKDmacro). Time of divergence of the Family (Time Family); Body Mass (BM); Sexual Maturity Age in days (SMA.d); Litter Size per year (LitSzPerYear); Maximum Life Span in months (MaxLifespan.m); Basal Metabolic Rate (MetRateMass\_g); Mean Distributional Range for species (Mean distr Species); Distributional range of each family (All distr Family). All biological traits are log transformed.

| Family          | Time_Family | rKDmacro | BM    | SMA.d | LitSzPerYear | MaxLifespan.m | MetRateMass_g | Mean distr Species | All distr Family |
|-----------------|-------------|----------|-------|-------|--------------|---------------|---------------|--------------------|------------------|
| Acrobatidae     | 41.6        | 0.024    | 3.30  | 5.49  | 0.693147181  | 3.82          | 3.34          | 13.35              | 26.71            |
| Atelidae        | 21.4        | 0.187    | 8.86  | 7.15  | -0.349079538 | 5.73          | 8.79          | 12.59              | 302.06           |
| Balaenidae      | 27.3        | 0.037    | 14.17 | 7.71  | -0.699894834 | 6.12          | 10.57         | 12.94              | 51.78            |
| Balaenopteridae | 19.3        | 0.207    | 15.37 | 7.43  | -0.591769072 | 6.60          | 11.39         | 13.08              | 91.54            |
| Bathyergidae    | 38          | 0.026    | 4.91  | 5.54  | 0.52551854   | 4.57          | 4.96          | 12.52              | 200.38           |
| Bovidae         | 26.2        | 0.802    | 10.65 | 6.36  | 0.088260038  | 5.26          | 10.36         | 13.27              | 1898.11          |
| Caenolestidae   | 75.6        | 0.013    | 3.43  | 5.73  | 0.125470647  | 4.10          | 3.77          | 9.82               | 58.95            |
| Camelidae       | 67.3        | 0.015    | 12.09 | 7.03  | 0            | 5.97          | 11.88         | 12.86              | 51.44            |
| Canidae         | 44.0        | 0.227    | 8.38  | 6.01  | 0.139534754  | 5.06          | 8.31          | 14.75              | 516.33           |
| Castoridae      | 66.4        | 0.030    | 9.83  | 6.72  | 0            | 5.45          | 9.84          | 15.72              | 31.44            |
| Caviidae        | 25.6        | 0.117    | 6.60  | 4.92  | 1.264703603  | 4.46          | 6.52          | 13.21              | 237.72           |



|                 |      |       |       |      |              |      |       |       |         |
|-----------------|------|-------|-------|------|--------------|------|-------|-------|---------|
| Cebidae         | 21.4 | 0.561 | 6.16  | 6.41 | 0.224837317  | 5.31 | 6.23  | 11.71 | 655.56  |
| Cercopithecidae | 29.6 | 0.203 | 8.55  | 7.04 | -0.214709328 | 5.63 | 8.54  | 12.00 | 1583.66 |
| Cervidae        | 27.8 | 0.576 | 10.29 | 6.31 | 0.057670626  | 5.30 | 10.25 | 12.68 | 646.78  |
| Cheirogaleidae  | 37.1 | 0.054 | 4.92  | 5.87 | 0.191699943  | 4.74 | 5.06  | 9.06  | 190.35  |
| Chinchillidae   | 20.2 | 0.050 | 6.82  | 5.68 | 0.577611156  | 5.01 | 6.95  | 11.94 | 83.56   |
| Chrysochloridae | 65.4 | 0.077 | 3.70  | 5.70 | 0.168964733  | 4.04 | 3.85  | 9.05  | 190.07  |
| Cricetidae      | 24.2 | 2.562 | 4.02  | 5.30 | 0.471915426  | 4.26 | 4.12  | 11.22 | 7641.92 |
| Ctenodactylidae | 44.3 | 0.045 | 5.31  | 5.85 | 0.199397052  | 4.67 | 5.52  | 12.89 | 64.44   |
| Ctenomyidae     | 17.3 | 0.809 | 5.29  | 5.81 | 0.419108963  | 4.68 | 5.36  | 10.06 | 603.50  |
| Cynocephalidae  | 86.2 | 0.012 | 7.07  | 6.20 | 0.351495148  | 3.29 | 7.32  | 12.93 | 25.85   |
| Dasypodidae     | 70.5 | 0.142 | 7.55  | 5.97 | 0.338764637  | 5.06 | 7.52  | 14.42 | 302.77  |
| Dasyuridae      | 27.3 | 0.037 | 3.93  | 5.75 | 0.231529052  | 3.90 | 4.01  | 11.69 | 806.35  |
| Daubentoniidae  | 52.2 | 0.019 | 7.91  | 6.73 | -0.867500568 | 5.68 | 8.18  | 11.86 | 11.86   |
| Delphinidae     | 19.8 | 0.101 | 11.62 | 7.34 | -0.44561324  | 5.77 | 11.34 | 12.96 | 440.61  |
| Didelphidae     | 20.2 | 0.050 | 4.31  | 5.36 | 0.471297397  | 4.03 | 4.44  | 11.97 | 1041.14 |
| Dinomyidae      | 20.2 | 0.050 | 9.43  | 5.75 | 0.614811707  | 4.73 | 9.41  | 14.49 | 14.49   |
| Echimyidae      | 7.3  | 0.959 | 5.29  | 5.75 | 0.455930051  | 4.61 | 5.31  | 11.25 | 1012.48 |
| Elephantidae    | 65.3 | 0.031 | 15.18 | 8.07 | -1.206163823 | 6.57 | 12.37 | 14.93 | 44.78   |
| Emballonuridae  | 51.5 | 0.058 | 2.63  | 5.79 | 0.209790512  | 4.78 | 2.91  | 13.35 | 681.02  |
| Equidae         | 55.1 | 0.182 | 12.59 | 7.00 | -0.44438065  | 5.99 | 11.94 | 13.44 | 107.48  |
| Erinaceidae     | 66.2 | 0.045 | 5.33  | 5.58 | 0.326130001  | 4.34 | 5.39  | 12.58 | 301.98  |
| Eschrichtiidae  | 19.3 | 0.052 | 17.12 | 8.07 | -0.693147181 | 6.83 | 12.36 | 14.54 | 14.54   |
| Felidae         | 37.8 | 0.106 | 8.72  | 6.33 | 0.295019957  | 5.29 | 8.59  | 14.94 | 597.78  |
| Geomyidae       | 28.4 | 0.317 | 5.46  | 5.45 | 0.442351269  | 4.17 | 5.34  | 9.82  | 392.91  |
| Giraffidae      | 29.4 | 0.034 | 13.06 | 7.13 | 0            | 6.03 | 12.05 | 14.38 | 28.76   |
| Gliridae        | 62.4 | 0.064 | 3.86  | 5.48 | 0.290029674  | 4.33 | 3.96  | 11.97 | 335.07  |
| Herpestidae     | 28.0 | 0.107 | 6.98  | 5.92 | 0.557964839  | 4.91 | 7.06  | 14.06 | 464.13  |
| Heteromyidae    | 28.4 | 1.197 | 3.66  | 5.13 | 0.498147779  | 3.92 | 3.69  | 11.54 | 692.28  |

|                   |      |       |       |      |              |      |       |       |         |
|-------------------|------|-------|-------|------|--------------|------|-------|-------|---------|
| Hippopotamidae    | 52.9 | 0.019 | 13.31 | 7.47 | 0            | 6.37 | 11.61 | 12.46 | 24.92   |
| Hipposideridae    | 50.1 | 0.040 | 2.97  | 5.84 | 0.197473761  | 4.83 | 3.16  | 11.87 | 961.09  |
| Hominidae         | 18.8 | 0.213 | 11.03 | 7.83 | -1.026188347 | 6.31 | 10.99 | 12.56 | 87.89   |
| Hyaenidae         | 33.8 | 0.089 | 10.30 | 6.66 | -0.158788749 | 5.72 | 10.25 | 15.92 | 63.69   |
| Hylobatidae       | 18.8 | 0.213 | 8.46  | 7.44 | -0.626507959 | 5.87 | 8.59  | 11.52 | 161.29  |
| Indriidae         | 37.1 | 0.108 | 7.88  | 6.85 | -0.168963757 | 5.46 | 7.82  | 9.26  | 101.90  |
| Lemuridae         | 37.1 | 0.243 | 7.64  | 6.61 | 0.171597558  | 5.42 | 7.63  | 9.18  | 174.33  |
| Leporidae         | 39.6 | 0.126 | 7.26  | 5.66 | 0.839537846  | 4.77 | 7.21  | 12.37 | 754.57  |
| Lorisidae         | 34.2 | 0.117 | 5.93  | 6.15 | 0.204375368  | 5.25 | 5.81  | 12.71 | 114.40  |
| Macropodidae      | 14.2 | 0.423 | 8.30  | 6.33 | 0.214321936  | 5.06 | 8.07  | 11.10 | 721.72  |
| Macroscelididae   | 73   | 0.014 | 4.44  | 5.00 | 0.898060155  | 4.13 | 4.48  | 13.05 | 195.81  |
| Manidae           | 77.6 | 0.013 | 8.58  | 6.60 | 0.043669573  | 5.39 | 8.51  | 14.39 | 115.09  |
| Megadermatidae    | 43.0 | 0.047 | 3.63  | 5.98 | 0.218457114  | 4.90 | 3.70  | 15.30 | 76.51   |
| Megalonychidae    | 19.6 | 0.102 | 8.74  | 7.22 | -0.178337472 | 5.88 | 8.48  | 14.49 | 28.99   |
| Microbiotheriidae | 64.8 | 0.015 | 3.22  | 6.32 | 0            | 3.65 | 3.77  | 10.98 | 10.98   |
| Molossidae        | 48.1 | 0.187 | 3.05  | 5.71 | 0.286335116  | 4.72 | 3.05  | 13.59 | 1359.40 |
| Monodontidae      | 13.1 | 0.153 | 13.95 | 7.75 | -0.891598119 | 6.17 | 12.53 | 13.53 | 27.05   |
| Mormoopidae       | 37.5 | 0.153 | 2.74  | 5.81 | 0.145987143  | 4.84 | 2.87  | 13.19 | 131.91  |
| Moschidae         | 26.2 | 0.038 | 8.71  | 6.36 | 0.038525681  | 5.23 | 8.58  | 12.53 | 87.71   |
| Muridae           | 24.2 | 2.355 | 4.37  | 5.41 | 0.473017157  | 4.33 | 4.45  | 10.91 | 7966.08 |
| Mustelidae        | 28.0 | 0.357 | 7.33  | 6.07 | 0.188163453  | 4.99 | 7.29  | 14.49 | 854.76  |
| Myocastoridae     | 7.3  | 0.137 | 8.76  | 5.23 | 0.947789399  | 4.97 | 7.93  | 15.24 | 15.24   |
| Myrmecophagidae   | 39.7 | 0.076 | 9.04  | 6.65 | 0            | 5.05 | 8.94  | 15.58 | 46.75   |
| Mystacinidae      | 45.3 | 0.022 | 2.94  | 5.55 | 0.346573591  | 4.58 | 2.92  | 12.12 | 24.24   |
| Natalidae         | 50.6 | 0.020 | 2.80  | 5.76 | 0.279238324  | 4.68 | 2.96  | 11.48 | 91.88   |
| Noctilionidae     | 36.6 | 0.027 | 3.42  | 5.81 | 0.335476143  | 4.82 | 3.59  | 16.45 | 32.91   |
| Notoryctidae      | 62.7 | 0.016 | 3.77  | 5.62 | 0.295559326  | 3.44 | 3.92  | 12.81 | 25.61   |
| Ochotonidae       | 39.6 | 0.051 | 4.97  | 5.57 | 0.52959923   | 4.18 | 4.94  | 11.96 | 358.87  |

|                   |      |       |       |      |              |      |       |       |         |
|-------------------|------|-------|-------|------|--------------|------|-------|-------|---------|
| Octodontidae      | 17.3 | 0.289 | 4.80  | 5.64 | 0.375472217  | 4.42 | 4.82  | 10.49 | 136.35  |
| Odobenidae        | 22   | 0.045 | 13.86 | 7.75 | -0.717350391 | 6.17 | 12.20 | 12.99 | 12.99   |
| Ornithorhynchidae | 45.9 | 0.022 | 7.30  | 6.61 | 0            | 5.58 | 7.18  | 13.21 | 13.21   |
| Orycteropodidae   | 76.8 | 0.013 | 10.94 | 6.63 | 0            | 5.66 | 10.78 | 16.71 | 16.71   |
| Otariidae         | 22   | 0.091 | 10.80 | 7.23 | -0.216495161 | 5.53 | 10.60 | 12.72 | 203.58  |
| Pedetidae         | 48.3 | 0.021 | 6.21  | 5.83 | 0.792315766  | 4.98 | 6.23  | 14.41 | 28.82   |
| Peramelidae       | 23.8 | 0.061 | 6.46  | 5.43 | 0.73144006   | 4.26 | 6.39  | 10.30 | 185.39  |
| Petauridae        | 36.8 | 0.027 | 5.50  | 6.00 | 0.456813878  | 4.96 | 5.61  | 10.16 | 111.81  |
| Phalangeridae     | 42.8 | 0.023 | 6.95  | 6.13 | 0.374698273  | 4.89 | 6.99  | 10.23 | 276.29  |
| Phascolarctidae   | 39   | 0.026 | 8.78  | 6.73 | 0            | 5.48 | 8.46  | 13.83 | 13.83   |
| Phocidae          | 30   | 0.100 | 12.24 | 7.42 | -0.125237123 | 5.97 | 11.83 | 14.02 | 266.46  |
| Phocoenidae       | 13.1 | 0.076 | 10.93 | 7.05 | -0.309913374 | 5.33 | 11.21 | 13.04 | 78.23   |
| Phyllostomidae    | 37.5 | 0.640 | 3.05  | 5.63 | 0.448890016  | 4.65 | 3.03  | 13.73 | 2196.53 |
| Physeteridae      | 24.5 | 0.041 | 13.86 | 7.51 | -0.661262765 | 5.99 | 12.06 | 13.58 | 40.74   |
| Potoroidae        | 14.2 | 0.070 | 7.17  | 5.95 | 0.782166222  | 4.73 | 7.12  | 10.05 | 100.48  |
| Procyonidae       | 28.0 | 0.036 | 7.61  | 6.44 | 0.123847813  | 5.37 | 7.69  | 12.95 | 181.35  |
| Pseudocheiridae   | 36.8 | 0.054 | 6.54  | 6.16 | 0.21921265   | 4.86 | 6.53  | 10.42 | 177.20  |
| Pteropodidae      | 57.5 | 0.104 | 4.82  | 6.00 | 0.395806605  | 4.95 | 4.86  | 10.65 | 1981.43 |
| Rhinocerotidae    | 48.6 | 0.062 | 14.22 | 7.76 | -1.015887673 | 6.26 | 12.25 | 13.09 | 65.47   |
| Rhinolophidae     | 50.1 | 0.120 | 2.74  | 5.84 | 0.165634639  | 4.83 | 2.91  | 12.25 | 943.59  |
| Rhinopomatidae    | 47.0 | 0.043 | 3.18  | 5.97 | 0.080698278  | 4.84 | 3.42  | 15.28 | 61.13   |
| Sciuridae         | 51.5 | 0.524 | 5.50  | 5.81 | 0.28998033   | 4.54 | 5.52  | 12.10 | 3363.44 |
| Solenodontidae    | 80.5 | 0.012 | 5.67  | 5.91 | 0.599788711  | 4.72 | 5.82  | 10.37 | 41.49   |
| Soricidae         | 66.2 | 0.725 | 3.10  | 5.50 | 0.329433086  | 4.18 | 3.33  | 11.05 | 4155.92 |
| Suidae            | 42.8 | 0.140 | 9.20  | 6.07 | 0.16960619   | 5.12 | 8.66  | 12.01 | 228.26  |
| Tachyglossidae    | 45.9 | 0.022 | 7.72  | 6.30 | -0.086908602 | 5.66 | 7.62  | 11.01 | 44.04   |
| Talpidae          | 74.3 | 0.121 | 4.07  | 5.64 | 0.124567848  | 4.02 | 4.10  | 11.60 | 452.44  |
| Tapiridae         | 48.6 | 0.082 | 12.31 | 6.84 | -0.466363743 | 5.90 | 11.67 | 13.56 | 54.26   |

|                  |      |       |       |      |              |      |       |       |         |
|------------------|------|-------|-------|------|--------------|------|-------|-------|---------|
| Tarsiidae        | 71.1 | 0.028 | 4.69  | 6.10 | 0.471290167  | 4.86 | 4.77  | 9.25  | 64.74   |
| Tarsipedidae     | 39.1 | 0.026 | 2.27  | 5.18 | 1.098612289  | 3.18 | 2.30  | 12.26 | 12.26   |
| Tayassuidae      | 42.8 | 0.070 | 10.27 | 6.33 | 0.372200895  | 5.30 | 10.15 | 15.24 | 45.72   |
| Tenrecidae       | 65.4 | 0.122 | 3.49  | 5.38 | 0.331012791  | 4.04 | 3.69  | 10.68 | 320.33  |
| Tragulidae       | 46.3 | 0.022 | 6.47  | 5.60 | 0.348008617  | 4.87 | 6.43  | 12.63 | 101.04  |
| Trichechidae     | 38.1 | 0.026 | 13.01 | 7.43 | -0.699916261 | 5.86 | 11.83 | 13.02 | 39.07   |
| Tupaiidae        | 90.6 | 0.055 | 4.89  | 5.58 | 0.415860371  | 4.59 | 4.93  | 11.77 | 223.54  |
| Ursidae          | 40.0 | 0.075 | 11.75 | 7.22 | -0.563520262 | 6.04 | 11.37 | 14.27 | 114.13  |
| Vespertilionidae | 44.0 | 0.455 | 2.62  | 5.76 | 0.153864503  | 4.81 | 2.74  | 12.60 | 5128.28 |
| Viverridae       | 39.7 | 0.428 | 7.62  | 6.04 | 0.560882356  | 5.07 | 7.69  | 13.21 | 462.48  |
| Vombatidae       | 39   | 0.026 | 10.24 | 6.76 | -0.23104906  | 5.77 | 9.99  | 11.42 | 34.26   |
| Ziphiidae        | 28.2 | 0.036 | 13.86 | 7.66 | -0.642530594 | 5.99 | 11.72 | 13.12 | 275.59  |

**Table S4.** Akaike Information Criterium (AIC) values for pglS analyses using the Brownian motion (BM) and Ornstein–Uhlenbeck (OU) correlation structure.

| Trait                                                   | Model                         | AIC BM   | AIC OU   |
|---------------------------------------------------------|-------------------------------|----------|----------|
| rKDmacro                                                | Body Mass                     | 164.6714 | 175.0108 |
|                                                         | Metabolic Rate                | 164.6843 | 174.7713 |
|                                                         | Longevity                     | 164.328  | 146.5953 |
|                                                         | Litters per Year              | 165.502  | 171.9412 |
|                                                         | Sexual Maturity Age           | 163.2486 | 170.3882 |
|                                                         | Family Geographic Range       | 160.0034 | 135.3067 |
|                                                         | MeanSpeciesGeographic Range   | 113.4815 | 169.9212 |
|                                                         | Longevity*Body Mass           | 168.2674 | 187.4945 |
|                                                         | Litters per Year*Longevity    | 168.2674 | 174.8892 |
|                                                         | Sexual Maturity Age*Longevity | 166.6973 | 179.3915 |
| Family Geographic Range * Mean Species Geographic Range | 107.9817                      | 154.9431 |          |
| rKDmicro                                                | Body Mass                     | 73.77    | 125.2634 |
|                                                         | Metabolic Rate                | 73.8     | 125.2437 |
|                                                         | Longevity                     | 68.6     | 119.2099 |
|                                                         | Litters per Year              | 73.7     | 122.9147 |
|                                                         | Sexual Maturity Age           | 72.34    | 125.1267 |
|                                                         | Geographic Range              | 73.54    | 126.1962 |
|                                                         | Longevity*Body Mass           | 72.11    | 132.3171 |
|                                                         | Litters per Year*Longevity    | 68.92    | 130.4255 |
|                                                         | Sexual Maturity Age*Longevity | 71.08    | 135.4805 |

**Table S5.** Results of models using non-imputed data.

| <b>Response</b> | <b>Model</b>                       | <b>Characteristic</b> | <b>Traits</b>                         | <b>slope</b>               | <b>p</b>         | <b>df</b>  |
|-----------------|------------------------------------|-----------------------|---------------------------------------|----------------------------|------------------|------------|
| rKDmacro        | Simple                             | Metabolic             | Body Mass                             | 1.23                       | 0.22             | 105        |
|                 |                                    |                       | Metabolic Rate                        | -0.44                      | 0.66             | 73         |
|                 |                                    | Reproductive          | Longevity                             | -1.66                      | 0.099            | 102        |
|                 |                                    |                       | Litters per Year                      | 1.66                       | 0.099            | 102        |
|                 |                                    |                       | <b>Sexual Maturity Age</b>            | <b>-2.65</b>               | <b>0.009</b>     | <b>95</b>  |
|                 |                                    | Geographic            | <b>Family Geographic Range</b>        | <b>8.15</b>                | <b>&lt;0.001</b> | <b>105</b> |
|                 | <b>MeanSpeciesGeographic Range</b> |                       | <b>-2.43</b>                          | <b>0.016</b>               | <b>105</b>       |            |
|                 | Multiple                           | Metabolic             | <b>Longevity*Body Mass</b>            |                            | <b>0.005</b>     | <b>100</b> |
|                 |                                    |                       | Reproductive                          | Litters per Year*Longevity | 0.059            | 97         |
|                 |                                    |                       | <b>Sexual Maturity Age*Longevity</b>  |                            | <b>0.007</b>     | <b>92</b>  |
|                 |                                    | Geographic            | <b>Family Geographic Range * Mean</b> |                            |                  |            |
|                 |                                    |                       | <b>Species Geographic Range</b>       |                            | <b>&lt;0.001</b> | <b>103</b> |
|                 |                                    |                       |                                       |                            |                  |            |
|                 |                                    |                       |                                       |                            |                  |            |
| rKDmicro        | Simple                             | Metabolic             | Body Mass                             | -0.21                      | 0.83             | 207        |
|                 |                                    |                       | Metabolic Rate                        | -1.45                      | 0.152            | 41         |
|                 |                                    | Reproductive          | <b>Longevity</b>                      | <b>-2.07</b>               | <b>0.039</b>     | <b>131</b> |
|                 |                                    |                       | Litters per Year                      | -0.74                      | 0.458            | 125        |
|                 |                                    |                       | Sexual Maturity Age                   | -0.01                      | 0.988            | 114        |
|                 | Geographic                         | Geographic Range      | -0.51                                 | 0.607                      | 207              |            |
|                 | Multiple                           | Metabolic             | Longevity*Body Mass                   |                            | 0.15             | 129        |
|                 |                                    | Reproductive          | <b>Litters per Year*Longevity</b>     |                            | <b>0.051</b>     | <b>106</b> |
|                 |                                    |                       | Sexual Maturity Age*Longevity         |                            | 0.12             | 106        |

**Figure S1.** Relationship between rKDmacro and the percentage of species that were karyotyped in each family.

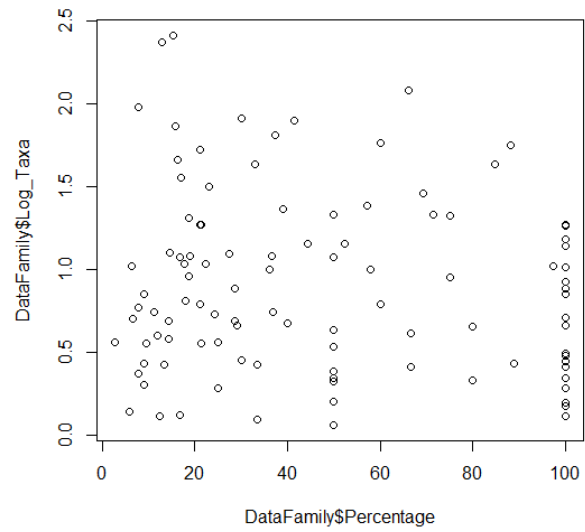

## References

- 1 Aguilera M, Perez-Zapata A and Martino A (1995) Cytogenetics and karyosystematics of *Oryzomys albigularis* (Rodentia, Critecidae) from Venezuela. *Cytogenet. Cell Genet.* 69, 44-49.

- 2 Al-Saleh AA (1988) Cytological studies of certain desert mammals of Saudi Arabia 6. First report on chromosome number and karyotype of *Acomys dimidiatus*
- 3 Andersen LW and Friedrich U (1988) The karyotype of the long-finned pilot whale, *Globicephala melaena*
- 4 Ando K, Tagawa T and Uchida TA (1977) Considerations of karyotypic evolution within Vespertilionidae. *Experientia* 33, 877-879.
- 5 Ando K, Tagawa T and Uchida TA (1980) Karyotypes of Taiwanese and Japanese bats belonging to the families Rhinolophidae and Hipposideridae. *Cytologia* 45, 423-432.
- 6 Andrews JC, Dill FJ, Masui S and Fisher HD (1973) The chromosome complement of the narwhal (*Monodon monoceros*) *Can. J. Genet. Cytol.* 15, 349-353.
- 7 Gallardo, M. H., and Patterson, B. D. (1987) An additional 14-chromosome karyotype and sex chromosome mosaicism in South American marsupials. *Fieldiana Zool New Ser* 6.
- 8 Arnason U (1972) The role of chromosomal rearrangement in mammalian speciation with special reference to Cetacea and Pinnipedia. *Hereditas* 70, 113-118.
- 9 Arnason U (1974) Comparative chromosome studies in Pinnipedia. *Hereditas* 76, 179-226.



- 10 Arnason U (1974) Comparative chromosome studies in Cetacea. *Hereditas* 77, 1-36.
- 11 Arnason U (1980) C- and G-banded karyotypes of three delphinids: *Stenella clymene*, *Lagenorhynchus albirostris* and *Phocoena phocoena*
- 12 Casartelli, C., Rogatto, S. R., and Ferrari, I. (1986) Cytogenetic analysis of some Brazilian marsupials (Didelphidae: Marsupialia). *Can J Genet Cytol* 28:21–29.
- 13 Arnason U, Benirschke K, Mead JG and Nichols WW (1977) Banded karyotypes of three whales: *Mesoplodon europaeus*, *M. carlhubbsi* and *Balaenoptera acutorostrata*
- 14 Arrighi FE, Sorenson MW and Shirley LR (1969) Chromosomes of the tree shrews (Tupaiaidae) *Cytogenetics* 8, 199-208.
- 15 Arroyo-Nombela JJ, Rodriguez Murcia C, Delibes M and Hiraldo F (1982) Comparative karyotype studies between Spanish and French populations of *Elyomys quercinus* L. *Genetica* 59, 161-166.
- 16 Baker RJ (1984) A sympatric cryptic species of mammal: a new species of *Rhogeessa* (Chiroptera: Vespertilionidae) *Syst Zool* 33, 178-183.
- 17 Baker RJ and Mascarrello JT (1969) Karyotypic analyses of the genus *Neotoma* (Cricetidae, Rodentia) *Cytogenetics* 8, 187-198.
- 18 Baker RJ and Hsu TC (1970) Further studies on the sex-chromosome systems of the American leaf-nosed bats (Chiroptera, Phyllostomidae). *Cytogenetics* 9, 131-138.

- 19 Baker RJ and Bickham JW (1980) Karyotypic evolution in bats: evidence of extensive and conservative chromosomal evolution in closely related taxa. *Syst. Zool* 29, 239-253.
- 20 Baker RJ and Bleier WJ (1971) Karyotypes of bats of the subfamily Carrollinae (Mammalia; Phyllostomidae) and their evolutionary implications. *Experientia* 27, 220-222.
- 21 Baker RJ , Bass RA and Johnson MA (1979) Evolutionary implications of chromosomal homology in four genera of Stenodermine bats (Phyllostomidae: Chiroptera). *Evolution* 33, 220- 226.
- 22 Barros MA, Reig OA and Perez-Zapata A (1992) Cytogenetics and karyosystematics of South American oryzomyine rodents (Cricetidae: Sigmodontinae). *Cytogenet. Cell Genet.* 59, 34-38.
- 23 Barroso CML and Seuanez H (1991) Chromosome studies on *Dasypus*, *Euphractus* and *Cabassous* (Edentata: Dasypodidae) *Cytobios* 68, 179-196.
- 24 Basrur PK (1966) The somatic chromosomes of the ferret. *J. Hered.* 57, 110-112
- 25 Basrur PK (1968) The karyotype of the long tailed weasel *Mustela frenatanoveboracensis* Emmons. *Can. J. Genet. Cytol.* 10, 390-394.

- 26 Baverstock PR, Watts CHS and Hogarth JT (1977) Chromosome evolution in Australian rodents. I. The Pseudomyinae, the Hydromyinae and the Uromys/ Melomysgroup. *Chromosoma* 61, 95-125.
- 27 Baverstock PR, Watts CHS, Hogarth JT, Robinson AC and Robinson JF (1977) Chromosome evolution in Australian rodents. II The Rattus group. *Chromosoma* 61, 227-241.
- 28 Becak ML, Batistic RF, Vizotto LD and Bezak W (1969) Sex-determining mechanism XY1Y2 in *Artibeus lituratus lituratus* (Chiroptera-Phyllostomidae). *Experientia* 25, 81-83.
- 29 Belcheva RG, Peshev TsH and Peshev DTs (1980) Chromosome C- and G-banding patterns in a Bulgarian population of *Microtus guentheri* Danford& Alston (Microtinae, Rodentia). *Genetica* 52/53, 45-48.
- 30 Rumpler Y, Ganzhorn JU, Tomiuk J, Laipoldt M and Wrater S (1998) A cytogenetic study of *Microcebus myoxinus*
- 31 Bronner, G. N. (1995a) Systematic revision of the golden mole genera *Amblysomus*, *Chlorotalpa* and *Calcochloris* (Insectivora: Chrysochloromorpha: Chrysochloridae), PhD Thesis. University of Natal.
- 32 Capanna, E., Civitelli, M. V., and Nevo, E. (1989) The chromosomes of *Amblysomus hottentotus* (Smith 1829) and *A. iris* (Thomas and Schwann 1905): A first report of the golden moles of Africa (Insectivora Chrysochloridae). *Trop Zool* 2:1–12.

- 33 Benirschke K, Ruedi D, Muller H, Kumamoto AT, Wagner KL and Downes HS (1980) The unusual karyotype of the lesser kudu, *Tragelaphus imberbis*
- 34 Benirschke K, Kumamoto AT and Merritt DA (1985) Chromosomes of the Chacoan peccary, *Catgonus wagneri* (Rusconi). *J Hered.* 76, 95-98.
- 35 Bernstein R, Pinto M, Morcom G and Bielert C (1980) A reassessment of the karyotype of *Papio ursinus*
- 36 Bhatnagar AN and El-Azawi TF (1978) A karyotype study of chromosomes of two species of hedgehogs, *Hemiechinus auritus*, and *Paraechinus aethiopicus* (Insectivora: Mammalia). *Cytologia* 43, 53-59.
- 37 George, W. (1979) The chromosomes of the hystricomorphus family Ctenodactylidae (Rodentia:Sciuromorpha) and their bearing of the relationships of four living genera, *Biol J Linn Soc* 65:261–280, Blackwell Publishing, Oxford.
- 38 Rickart, E. A. (2003) Chromosomes of Philippine mammals (Insectivora, Dermoptera, Primates, Rodentia, Carnivora). *Proc Biol Soc Washington* 116:699–709.
- 39 Bick YAE, Murtagh C and Sharman GB (1973) The chromosomes of an egg-laying mammal *Tachyglossus aculeatus* (the echidna). *Cytobios* 7, 233-243.

- 40 Bickman JW (1979) Banded karotypes of 11 species of American bats (Genus Myotis) Cytologia 44, 789-797.
- 41 Bickman JW (1979) Chromosomal variation and evolutionary relationships of Vespertilionid bats. J. Mamm 60, 350-363.
- 42 Bickham JW and Hafner JC (1978) A chromosomal banding study of three species of Vespertilionid bats from Yugoslavia. Genetica 48, 1-3.
- 43 CRES San Diego (unpublished)
- 44 Biltueva LS, Prelman PI, Rogatcheva MB, Fedorova EL, Vorobieva NV, Harada M, Mekada K, Oda S-I and Graphodatsky A (1999) Comparative cyogenetics of some species of Crocidura (Insectivora) with  $2n=40$ . Cytologia 64, 293-299.
- 45 Stanyon (unpublished)
- 46 Boer de LEM (1973) Cytotaxonomy of the Lorisioidea (Primates: Prosimii) II. Chromosome studies in the Lorisidae and karyological relationships within the superfamily. Genetica, 44, 330-367.
- 47 Bogart MH and Benirschke K (1977) Chromosomal analysis of the pygmy chimpanzee (*Pan paniscus*) with a comparison to man. Folia Primatol 27, 60-67.
- 48 Borgaonkar DS and Gould E (1965) Chromosome complement of Tenrecs, *Centetes ecaudatus* (Order Insectivora, Class Mammalia) Experientia 21, 631-632.

49 Borgaonkar DS and Gould E (1968) Homozygous reciprocal translocation as a mode of speciation in *Microgale Thomas 1883* (Tenrecidae-Insectivora) *Experientia* 24, 506-509.

50 Bosma AA (1991) The chromosomal G-banding pattern in the wart hog *Phacochoerus aethiopicus* (Suidae, Mammalia) and its implications for the systematic position of the species *Genetica* 49, 15-19.

51 Bosma AA, Oliver WLR and Macdonald AA (1983) The karyotype, including G- and C-banding patterns, of the pigmy hog *Sus (Porcula) salvanius* (Suidae, Mammalia). *Genetica* 61, 99-106.

52 Bosma AA, De Haan NA, Blouch RA and Macdonald AA (1991) Comparative cytogenetic studies in *Sus verrucosus*, *Sus celebensis* and *Sus scrofa vittatus* (Suidae, Mammalia) *Genetica* 83, 189-194.

53 Bosma AA, de Haan NA, Mellink CHM, Yerle M and Zijlstra C (1996) Chromosome homology between the domestic pig and the babirusa (family Suidae) elucidated with the use of porcine painting probes. *Cytogenet. Cell Genet.* 75, 32-35.

54 Brown CJ, Dunbar VG and Shafer DA (1986) A comparison of the karyotypes of six species of the genus *Macaca* and a species of the genus *Cercocebus*

- 55 Brum-Zorrilla N and Langguth A (1980) Karyotype of the South American pampax fox *Pseudalopex gymnocercus* (Carnivora, Canidae). *Experientia* 36, 1043-1044.
- 56 Buckland RA and Evans HJ (1978) Cytogenetics aspects of phylogeny in the Bovidae I. G-banding. *Cytogenet. Cell Genet.* 21, 42-63.
- 57 Reig OA, Aguilera M, Barros MA and Useche M (1980) Chromosomal speciation in a Rassenkreis of Venezuelan spiny rats (genus *Proechimys*, Rodentia, Echimididae). *Genetica* 52/53: 291-312.
- 58 Bunch TD, Foote WC and Spillet JJ (1976) Translocations of acrocentric chromosomes and their implications in the evolution of sheep (*Ovis*). *Cytogenet. Cell Genet.* 17, 122-136.
- 59 Bunch TD, Wang S, Zhang Y, Liu A and Lin S (2000) Chromosome evolution of the blue sheep/bharal (*Pseudois nayaur*). *J. Hered.* 91, 168-170.
- 60 Burgos M, Jimenez R, Olmos DM and Diaz de la Guardia R (1988) Heterogeneous heterochromatin and size variation in the sex chromosomes of *Microtus cabrerarum*
- 61 Burgos M, Jimenez R and Diaz de la Guardia R (1989) Comparative studies of G- and C-banded chromosomes of five species of *Microtidae*. *Cytogenet. Cell Genet.* 78, 3-12.

- 62 Capana E (1968) Some considerations on the evolution of the karyotype of Microchiroptera. *Experientia* 24, 624-626.
- 63 Carleton MD and Myers P (1979) Karyotypes of some harvest mice, genus *Reithrodontomys*
- 64 Chandra HS, Hungerford DA, Wagner J and Snyder RL (1967) Chromosomes of five artiodactyl mammals. *Chromosoma* 21, 211-220.
- 65 Chen Z, Jiang X and Wang Y (1994) Studies on the karyotype of oriental vole (*Eothenomys miletus*) *Cytologia* 59, 289-293.
- 66 Chiarelli B (1966) The chromosome complement of *Nasalis larvatus* (Wurm 1871) *Experientia* 22, 797
- 67 Chu EHY and Bender MA (1961) Chromosome cytology and evolution in primates. *Science* 133, 1399-1405.
- 68 Citoler P, Gropp A and Natarajan AT (1972) Timing of DNA replication of autosomal heterochromatin in the hedgehog. *Cytogenetics* 11, 53-62.
- 69 Claro F, Hayes H and Cribiu EP (1995) Identification of p and q arms of the blesbok (*Damaliscus dorcas phillypsi*, Alcelaphinae) RBG-banded chromosomes with comparison to other wild and domestic bovids *Cytogenet. Cell Genet* 70, 268-272.
- 70 Claro F, Hayes H and Cribiu EP (1996) The karyotype of the addax and its comparison with karyotypes of other species of Hippotraginae antelopes. *Hereditas* 124, 223-227.



- 71 Cohen MM and Pinky L (1966) Autosomal polymorphism via translocation in the Guinea pig, *Cavia porcellus* L. *Cytogenetics* 5, 120-132.
- 72 Committee for the Standardization of Chromosomes of *Peromyscus* (1977) Standardized karyotype of deer mice, *Peromyscus* (Rodentia). *Cytogenet. Cell Genet.* 19, 38-43.
- 73 Contreras LC, Torres-Mura and Spotorno AE (1990) The largest known chromosome number for a mammal, in a South American desert rodent. *Experientia* 46, 506-508.
- 74 Contreras LC, Torres-Mura, Spotorno AE and Walker LL (1994) Chromosomes of *Octomys mimax* and *Octodontomys gliroides* and relationships of Octodontid rodents. *J. Mamm.* 75, 768-774.
- 75 Cooper JEK and Hsu TC (1972) The C-band and G-band patterns of *Microtus agrestis* chromosomes. *Cytogenetics* 11, 295--304.
- 76 Corin-Frederic J (1969) Les formules gonosomiques dites aberrantes chez les Mammifères Eutheriens. *Chromosoma* 27, 268-287.
- 77 Davis BL, Williams SL and Lopez G (1971) Chromosome studies of *Geomys*
- 78 Diaz de la Guardia R, Ladron de Guevara GRG and Pretei Martinez A (1979) Chromosomal polymorphism, caused by pericentric inversions in *Rattus rattus* ssp. *frugivorus* (Raf.) from the south east of the Iberian peninsula. *Genetica* 51, 103-106.

- 79 Di Bernardino D and Burguete I (1998) High resolution RBA-banding comparison between early prometaphase chromosomes of cattle (*Bos taurus*) and goat (*Capra hircus*L.) at 700 band level. *Cytogenet Cell Genet.* 83, 130-138.
- 80 Dresser VA and Hamilton AE (1979) Chromosomes of Lemuriformes. V. A comparison of the karyotypes of *Cheirogaleus medius* and *Lemur fulvus fulvus*
- 81 Ducroz J-F, Granjon L, Lombard M and Volobouev V (1999) Comparative chromosome analysis (R- and C-bands) of two South African murid species, *Lemniscomys rosalia* and *Rhabdomys pumilio* (Rodentia, Murinae) *Cytogenet. Cell Genet.* 87, 69-74.
- 82 Duffield DA, Ridgway SH and Sparkes RS (1967) Cytogenetic studies of two species of porpoise. *Nature* 273, 189-190.
- 83 Dulic B, Soldatovic and Rimsa D(1967) La formule chromosomique de la Noctule,*Nyctalus noctula* (Mammalia, Chiroptera) *Experientia* 23, 945-946.
- 84 Dutrillaux B, (1979) Very large analogy of chromosome banding between *Cebus capucinus* (Platyrrhini) and man. *Cytogenet. Cell Genet.* 24, 84-94.
- 85 Morielle-Versute, E., Taddei, V. A., and Varella- García, M. (1992) Chromosome banding studies of *Chrotopterus auritus* (Chiroptera; Phyllostomidae). *Rev Brasil Genet* 15:569–573.

- 86 Dutrillaux B, Rumpler Y (1988) Absence of chromosomal similarities between Tarsiers (*Tarsius syrichta*) and other primates. *Folia Primatol.* 50, 130-133.
- 87 Dutrillaux B, Rethore MO, Aurias A and Goustard M (1975) Analyse du caryotype de deux especes de Gibbons (*Hylobates lar* and *H. concolor*) par differntes techniques de marquage Cytogenet. *Cell Genet.* 15, 81-91.
- 88 Dutrillaux B, Viegas-Pequignot R, Dubos C and Masse R (1978) Complete or almost complete analogy of chromosome banding beteween the baboon (*Papio papio*) and man. *Hum Genet.* 43, 37-46.
- 89 Dutrillaux B, Biemont MC, Viegas-Pequignot and Laurent C (1979) Comparison of the karyotype of four Cercopithecoidae: *Papio papio*, *P. anubis*, *Maccaca mulata* and *M fascicularis*
- 90 Dutrillaux B, Couturier J and Fosse A-M (1980) The use of high resolution banding in comparative cytogenetics: comparison between man and *Lagothrix lagotricha* (Cebidae). *Cytogenet. Cell Genet.* 27, 45-51.
- 91 Choudhury, R. C., and Mohanty, N. (1993) Karyotype and banding pattern study in an Indian microchiroptera, *Megaderma Lyra Lyra* Geoffroy. *Bionature* 13(1):3-8.

- 92 Effron M, Bogart MH, Kumamoto AT and Benirschke K (1976) Chromosome studies in the mammalian subfamily Antilopinae. *Genetica* 46, 419-444.
- 93 Egozcue J (1969) Meiosis in five *Macaca* species. *Folia Primatol* 11, 1-16.
- 94 Egozcue J and Vilarasau de Egozcue M (1966) The chromosome complement of the howler monkey (*Alouatta caraya*, Humboldt 1812) *Cytogenetics* 5, 20-27.
- 95 Hoyt, R. A., and Baker, R. J. (1980) *Natalus* major mammalian species. *Am Soc Mammal* 130:1-3.
- 96 Egozcue J, Perkins EM, Hagemenas F and Ford DM (1969) The chromosomes of some playrrhini (*Callicebus*, *Ateles* and *Saimiri*). *Folia Primat.* 11, 17-27.
- 97 Elder FFB (1980) Tandem fusion, centric fission, and chromosomal evolution in cotton rats, genus *Sigmodon*
- 98 Eldridge MDB and Johnston PG (1993) Chromosomal rearrangements in rock wallabies, *Petrogale* (Marsupialia: Macropodidae). VIII. An investigation of the nonrandom nature of karyotypic change. *Genome* 36, 524-534.
- 99 Eldridge MDB, Johnston PG and Close RL (1992) Chromosomal rearrangements in rock wallabies, *Petrogale* (Marsupialia: Macropodidae). VI. Determination of the plesiomorphic karyotype: G-banding comparison of *Thylogale* with *Petrogale persephone*, *P. xanthropus* and *P.l. lateralis*

- 100 Estop A, Garver JJ and Pearson PL (1978) Further studies on the comparative karyology of the african green and rhesus monkeys. *Genetica* 49, 131-138.
- 101 Bickham, J. W., Daniel, M. J., and Haiduk, M. W. (1980) Karyotype of *Mystacina tuberculata* (Chiroptera, Mystacinidae). *J Mammal* 61:22–324.
- 102 Fay FH, Rausch VR and Feltz ET (1967) Cytogenetic comparison of some pinnipeds (Mammalia, Eutheria) *Can. J. Zool.* 45, 773-778.
- 103 Fernandez-Donoso R, Fraccaro M, Lindsten J, Porta F, Scappaticci S and Tiepolo L. (1969) The chromosomes of the alpine marmot *Marmota marmota* L. (Rodentia: Sciuridae). *Hereditas* 63, 170-179.
- 104 Fontana F and Rubini M (1990) Chromosomal evolution in Cervidae. *Biosystems* 24, 157-174.
- 105 Fredga K (1972) Comparative chromosome studies in mongooses (Carnivora, Viverridae). *Hereditas* 71, 1-74.
- 106 Fredga K, Ims RA, Bondrup-Nielsen S, and Fredriksson R (1986) Centric fission in *Microtus oeconomus*
- 107 Freitas TRO, Mattevi MS and Oliveira LFB (1984) Unusual C-band patterns in three karyotypically rearranged forms of *Scapteromys* (Rodentia, Critecidae) *Cytogenet. Cell Genet.* 38, 39-44.

- 108 Fujimoto K, Oda S-I, Koyasu K, Harada M and Sonta S-I (1997) Comparative analysis of the greater long-tailed hamster and the Chinese hamster. *Cytologia* 62, 315-321.
- 109 Gallagher DS, and Womack JE (1992) Chromosome conservation in the Bovidae. *J. Hered* 83, 287-298.
- 110 Gallagher DS, Derr JN and Womack JE (1994) Chromosome conservation among the advanced pecorans and determination of the primitive bovid karyotype. *J. Hered* 85, 204-210.
- 111 Galleni L, Stanyon R, Tellini A, Giordano G and Santini L (1992) Karyology of the Savi pine vole, *Microtus savii* (De Selys-Longchamps 1838) (Rodentia, Arvicolae): G-, C-, DA/DAPI-, and AluI bands. *Cytogenet. Cell Genet.* 59, 290-292.
- 112 Gamperl R (1982) Chromosomal evolution in the genus *Clethrionomys*
- 113 Calaby, J. H, Corbett, L. K., Sharman, G. B., and Johnston, P. G. (1974) The chromosomes and systematic position of the marsupial mole, *Notoryctes typhlops*. *Aust J Sci* 27:529–532.
- 114 Garcia M, Borrell A, Mudry M, Egozcue J and Ponsa M (1995) Prometaphase karyotype and restriction-enzyme banding in squirrel monkeys, *Simiari boliviensis boliviensis* (Primates: Platyrrhini). *J. Mamm.* 76, 497-503.

- 115 Gardner AL (1971) Karyotypes of two rodents from Peru, with a description of the highest diploid number recorded for a mammal. *Experientia* 27, 1088-1089.
- 116 Gardner AL (1977) Chromosomal variation in *Vampyressa* and a review of chromosomal evolution in the Phyllostomidae (Chiroptera). *Syst Zool.* 26, 300-318.
- 117 Geise L, Canavez FC and Seuanez HN (1998) Comparative karyology in *Akodon* (Rodentia, Sigmodontinae) from southeastern Brazil. *J Hered.* 89, 158-163.
- 118 Genest FB and Morisset P (1979) The chromosomes of the Canadian beaver *Castor canadensis*
- 119 Genoways HH, Patton JC and Choate JR (1977) Karyotypes of shrews of the genera *Cryptotis* and *Blarina* (Mammalia: Soricidae) *Experientia* 33, 1294-1295.
- 120 George SB, Genoways HH, Choate JR and Baker RJ (1982) Karyotypic relationships within the short-tailed shrews, genus *Blarina*
- 121 Gileva EA (1980) Chromosomal diversity and an aberrant genetic system of sex determination in the arctic lemming, *Dicrostonyx torquatus pallas* (1779). *Genetica* 52/53, 99-103.

- 122 Gileva EA (1983) A contrasted pattern of chromosome evolution in two genera of lemmings, *Lemmus* and *Dicrostonyx* (Mammalia, Rodentia) *Genetica* 60, 173-179.
- 123 Gordon DH (1991) Chromosomal variation in the water rat *Dasymys incomtus* (Rodentia: Muridae) *J. Mamm.* 72, 411-414.
- 124 Biltueva and Graphodatsky (unpublished)
- 125 Gropp A and Natarajan AT (1972) Karyotype and heterochromatin pattern of the Algerian hedgehog. *Cytogenetics* 11, 259-269.
- 126 Gropp A, Giers D, Fernandez-Donoso R, Tiepolo L and Fraccaro M (1970) The chromosomes of the chamois (tribe Rupicaprini Simpson) *Cytogenetics* 9, 1-8.
- 127 Haiduk MW, Bickham JW and Scmidly DJ (1979) Karyotypes of six species of *Oryzomys* from Mexico and central America *J. Mammal.* 60, 610-615.
- 128 Haiduk MW, Baker RJ, Robbins LW and Schlitter DA (1981) Chromosomal evolution in African megachiroptera: G- and C-band assessment of the magnitude of change in similar standard karyotypes. *Cytogenet Cell Genet.* 29, 221-232.
- 129 Hamilton AE and Buettner-Janusch J (1977) Chromosomes of Lemuriformes. III The genus *Lemur*: karyotypes of species, subspecies and hybrids. *Ann NY Acad Sci* 293, 125-159.



- 130 Harada M, Yebutra S, Tsuchiya K and Takada S (1985) Karyotypes of seven species of bats from Thailand (Chiroptera, Mammalia) *Experientia* 41, 1610-1611.
- 131 Graphodatsky et al. (Unpublished)
- 132 Hassan HA (1999) G-banded karyotypes of four Egyptian species of order Carnivora (Mammalia: Carnivora) *Cytologia* 64, 346-356.
- 133 Hatch FT, Bodner AJ, Mazrimas JA and Moore DH (1976) Satellite DNA and cytogenetic evolution. DNA quantity, satellite DNA and karyotype variations in kangaroo rats (genus *Dipodomys*) *Chromosoma* 58, 155-168.
- 134 Hielscher K, Stubbe A, Zernahle K and Samjaa R (1992) Karyotypes and systematics of Asian high mountain voles, genus *Alticola* (Rodentia, Arvicolidae) *Cytogenet. Cell Genet.* 59, 307-310.
- 135 Hoffman RS and Nadler CF (1968) Chromosomes and systematics of some North American species of the genus *Marmota* (Rodentia: Sciuridae). *Experientia* 24, 740-742.
- 136 Hoi-Sen Y and Dhaliwal SS (1976) Chromosomes of the fruit-bat subfamily *Macroglossinae* from peninsular Malaysia. *Cytologia* 41, 85-89.
- 137 Holden HE and Eabry HS (1970) Chromosomes of *Sylvilagus floridanus* and *S. transitionalis*

- 138 Houck ML, Ryder OA, Vahala J, Kock RA and Oosterhuis JE (1994) Diploid chromosome number and chromosomal variation in the white rhinoceros (*Ceratotherium simum*) J. Hered 85, 30-34.
- 139 Houck ML, Kumamoto AT, Cabrera RM and Benirschke K (1998) Chromosomal rearrangements in a Somali wild ass pedigree, *Equus africanus somaliensis*(Perissodactyla, Equidae) Cytogenet. Cell Genet. 80, 117-122.
- 140 Hsu TC (1969) Robertsonian fusion between homologous chromosomes in a natural population of the least cotton rat, *Sigmodon minimus* (Rodentia, Cricetidae) Experientia 25, 205-206
- 141 Hsu TC and Johnson ML (1963) Karyotypes of two mammals from Malaya. Am. Nat. 97, 127-129.
- 142 Huang CC (1968) Karyologic and autoradiographic studies of the chromosomes of *Rattus (Mastomys) natalensis*
- 143 Hubner R, Maddalena T and Poduschka W (1991) The karyotype of the Middle-African hedgehog *Atelerix albiventris* Wagner, 1841 and its cytotaxonomical relationships to other Erinaceinae (Insectivora: Erinaceidae) Genetica 83, 243-246.
- 144 Qumsiyeh, M. B., Owen, R. D., and Chesser, R. K. (1988) Differential rates of genetic and chromosomal evolution in bats of the family Rhinolophidae. Genome 30:326–335.

- 145 Houck, M. L., Kingswood, S. C., and Kumamoto, A. T. (2000) Comparative cytogenetics of tapirs, genus *Tapirus* (Perissodactyla, Tapiridae). *Cytogenet Cell Genet* 89:110–115.
- 146 Hungerford DA and Snyder RC (1967) Somatic chromosomes of a black rhinoceros (*Diceros bicornis* GRAY 1821) *Am. Nat* 101, 357-358.
- 147 Hungerford DA, Sharat Chandra H, Snyder RL and Ulmer FA (1966) Chromosomes of three elephants, two Asian (*Elephas maximus*) and one African (*Loxodonta africana*). *Cytogenetics* 5, 243-246.
- 148 Iannuzzi L, Di Meo GP, Perucatti A and Bardaro T (1998) ZOO-FISH and R-banding reveal extensive conservation of human chromosome regions in euchromatic regions of river buffalo chromosomes. *Cytogenet. Cell Genet.* 82, 210-214.
- 149 Jarrel GH (1979) Karyotype of the bowhead whale (*Baleana mysticetus*) *J. Mammal* 60, 607-610.
- 150 Jarrel GH and Arnason U (1981) Banded karyotypes of a belukha whale, *Delphinapterus leucas*
- 151 Jotterand-Bellomo M (1984) New developments in vertebrate cytotaxonomy VII\*. *Les chromosomes de Rongeurs (Ordre Rodentia Bowdich, 1821)* *Genetica* 64, 3-64.

- 152 Jotterand-Bellomo M (1986) Le genre *Mus* africain, un exemple d'homogénéité caryotypique: étude cytogénétique de *Mus minutoides/musculoides* (Cote d'Ivoire), de *M. setulosus* (République Centrafricaine) et le *M. mattheyi* (Burkina Faso) *Cytogenet. Cell Genet.* 42, 99-104.
- 153 Jotterand-Bellomo M and Schauenberg P (1988) Les chromosomes du rat de Cuming, *Phloemys cumingi* Waterhouse, 1839 (Mammalia: Rodentia). *Genetica* 76, 181-190.
- 154 Kiblicky P (1969) The chromosomes of two species of the genus *Oryzomys* (Rodentia-Cricetidae) *Experientia* 25, 1338-1339.
- 155 Kiblicky P and Reig OA (1966) Variation of chromosome number within the genus *Ctenomys* and description of the male karyotype of *Ctenomys talarumtalarum* Thomas. *Nature* 212, 436-438.
- 156 Kingswood SC, Kumamoto AT, Charter SJ, Aman RA and Ryder OA (1998) Centric fusion polymorphisms in waterbuck (*Kobus ellipsiprymnus*) *J. Hered.* 89, 96-100.
- 157 Klinger HP (1963) The somatic chromosomes of some primates (*Tupaia glis*, *Nycticebus coucang*, *Tarsius bancanus*, *Cercocebus aterrimus*, *Symphylangus syndactylus*) *Cytogenetics* 2, 140-151.
- 158 Koiffmann CP and Saldanha PH (1981) The karyotype of *Cacajao melanocephalus* (Platyrrhini, Primates) *Folia Primatol.* 36, 150-155.

- 159 Kumamoto AT, Charter SJ, Kingswood SC, Ryder OA and Gallagher DS (1999) Centric fusion differences among *Oryx dammah*, *O. gazella* and *O. leucoryx* (Artiodactyla, Bovidae) *Cytogenet. Cell Genet.* 86, 74-80.
- 160 Laguarda-Figueras A, Romero-Jarero J, Paulete J and Scaglia de Paulete S (1973) Chromosome analysis and meiotic behaviour of *Pappogeomys* (*Cratogeomys*) *merriami merriami*
- 161 Rofe, R. (1979) G-banding and chromosomal evolution in Australian marsupials, PhD Thesis. University of Adelaide, Australia.
- 162 Benirschke, K. (ed.) (1969) *Comparative Mammalian Cytogenetics: An International Conference at Dartmouth Medical School, Hanover, New Hampshire.* Springer-Verlag, New York.
- 163 Lee MR and Elder FBF (1977) Karyotypes of eight species of Mexican rodents (Muridae) *J. Mamm.* 58, 479-487.
- 164 Liapunova EA and Vorontsov N N (1970) Chromosomes and some issues of the evolution of the ground squirrel genus *Citellus* (Rodentia , Sciuridae) *Experientia* 26, 1033-1038.
- 165 Hayman, D. L. (1990) Marsupial cytogenetics. *Aust J Zool* 37:331–348.
- 166 Liascovich RC, Barquez RM and Reig OA (1989) A karyological and morphological reassessment of *Akodon* (*Abrothrix*) *illuteus* Thomas. *J. Mammal.* 70, 386-391.

- 167 Lima MCM and Seuanez HN (1989) Cytogenetic characterization of *Alouatta belzebul* with atypical pelage coloration. *Folia Primatol.* 52, 97-101.
- 168 Lopez-W R, Lopez-O G, Aguilar MA and Arellano E (1995) Karyotypic analysis of *Plecotus mexicanus* (Chiroptera: Vespertilionidae) *Cytologia* 60, 39-41.
- 169 Maia V and Hulak A (1981) Robertsonian polymorphism in chromosomes of *Oryzomys subflavus* (Rodentia, Cricetidae) *Cytogenet. Cell Genet.* 31, 33-39.
- 170 Mandahl N (1978) Variation in C-stained chromosome regions in European hedgehogs (Insectivora, Mammalia) *Hereditas* 89, 107-128.
- 171 Mandahl N and Fredga K (1975) Q-, G- and C-band patterns of the mink chromosomes. *Hereditas* 81, 211-220.
- 172 Mandahl N and Fredga K (1980) A comparative chromosome study by means of G-, C- and NOR-bandings of the weasel, the pygmy weasel and the stoat (*Mustela*, Carnivora, Mammalia) *Hereditas* 93, 75-83.
- 173 Gray, B. A., Zori, R. T., McGuire, P. M., and Bonde, R. K. (2002) A first generation cytogenetic ideogram for the Florida manatee (*Trichechus manatus latirostris*) based on multiple chromosome banding techniques. *Hereditas* 137:215–223.

- 174 Gallagher, D. S. Jr., Houck, M. L., Ryan, A. M., Womack, J. E., and Kumamoto, A. T. (1996) A karyotypic analysis of the lesser Malay chevrotain, *Tragulus javanicus* (Artiodactyla: Tragulidae). *Chromosome Res* 4:545–551.
- 175 Martin PG and Hayman DL (1967) Quantitative comparisons between the karyotypes of Australian marsupials from three different superfamilies. *Chromosoma* 20, 290-310.
- 176 Martinez R, Aguilera M and Ferreira C (1999) The karyotype and C-banding of *Cebus nigrivittatus* from the Coastal Cordillera, Venezuela. *Folia Primatol.* 70, 37-40.
- 177 Tsigalidou V, Simotas AG and Fasoulas A (1966) Chromosomes of the coypu. *Nature* 211, 994-995.
- 178 Mascarrello JT and Mazrimas JA (1977) Chromosomes of the antelope squirrels (Genus *Ammospermophilus*): A systematic banding analysis of four species with unusual constitutive heterochromatin. *Chromosoma* 64, 207-217.
- 179 Mascarrello JT and Bolles K (1980) C- and G-banded chromosomes of *Ammospermophilus insularis* (Rodentia: Sciuridae) *J. Mamm.* 61, 714-715.
- 180 Mascarrello JT and Rogers DS (1988) Banded chromosomes of *Lyomys salvini*, *Heteromys oresterus* and *H. desmarestianus*

- 181 Massarini AI, Barros MA, Ortells MO and Reig OA (1991) Chromosomal polymorphism and small karyotypic differentiation in a group of *Ctenomys* species from Central Argentina (Rodentia: Octodontidae) *Genetica* 83, 131-144.
- 182 Massarini AI, Barros MA, Roig VG and Reig OA (1991) Banded karyotypes of *Ctenomys mendocinus* (Rodentia: Octodontidae) from Mendoza, Argentina. *J. Mamm.* 72, 194-198.
- 183 Masters J (1986) Geographic distributions of karyotypes and morphotypes within the Greater Galagines. *Folia Primatol.* 46, 127-141.
- 184 Matthey R (1962) Etudes sur les chromosomes d'*Ellobius lutescens* Th. (Mammalia-Muridae-Microtinae) *Cytogenetics* 1, 180-195.
- 185 Matthey R (1968) Les chromosomes de *Leggadina hermannsburgensis hermannsburgensis* Waite et la probleme des Muridae australiens. *Experientia* 24, 1160-1161.
- 186 Melander Y and Hansen-Melander E (1980) Chromosome studies in African wild pigs (Suidae, Mammalia). *Hereditas* 92, 283-289.
- 187 Meylan A (1972) Caryotype de quelques hybrides interspecifics de *Pitymys* (Mammalia, Rodentia) *Experientia* 28, 1507-1511.
- 188 Meylan A and Vogel P (1982) Contribution a la cytotaxonomie des Soricides (Mammalia, Insectivora) de l'Afrique occidentale. *Cytogenet. Cell Genet.* 34, 83-92.



- 189 Morielle-Versute E, Varella-Garcia and Taddei VA (1996) Karyotypic patterns of seven species of molossid bats (Molossidae, Chiroptera). *Cytogenet. Cell Genet.* 72, 26-33.
- 190 Muller, S, Stanyon R, O'Brien PCM, Ferguson-Smith MA, Plesker R and Wienberg J (1999) Defining the ancestral karyotype of all primates by multidirectional chromosome painting between tree shrews, lemurs and humans. *Chromosoma* 108, 393-400.
- 191 Murray JD, Sharman GB, McKay GM and Calabay JH (1980) Karyotypes, constitutive heterochromatin and taxonomy of the ringtail opossums of the genus *Pseudocheirus*(Marsupialia: Petauridae). *Cytogenet. Cell Genet.* 27, 73-82.
- 192 Nachman MW (1992) Geographic patterns of chromosomal variation in South American marsh rats, *Holochilus brasienlis* and *H. vulpinus*
- 193 Nadler CF (1968) The chromosomes of *Spermophilus townsendi* (Rodentia: Scuridae) and report of two new subspecies. *Cytogenetics* 7, 144-157.
- 194 Nadler CF (1971) Chromosomes of the Dall sheep *Ovis dalli dalli* (Nelson). *J. Mammal* 52, 461-462.
- 195 Nadler CF and Lay DM (1971) Chromosomes of the Asian flying squirrel *Petaurista petaurista* (Pallas). *Experientia* 27, 1225
- 196 Nadler CF and Hoffman (1970) Chromosomes in some Asian and South American squirrels (Rodentia: Sciuridae) *Experientia* 26, 1383
- 197 Nadler CF and Hoffman RS (1974) Chromosomes of the African squirrel *Xerus rutilus*(Rodentia: Sciuridae). *Experientia* 30, 889-891.

- 198 Nadler CF and Harris KE (1967) Chromosomes of the North American prairie dog *Cynomys ludovicianus*
- 199 Nadler CF and Sutton DA (1967) Chromosomes of some squirrels (Mammalia-Sciuridae) from the genera *Sciurus* and *Glaucomys*
- 200 Nadler CF, Hoffmann RS and Wolf A (1973) G-band patterns as chromosomal markers, and the interpretation of chromosomal evolution in wild sheep (*Ovis*) *Experientia* 29, 117-119.
- 201 Pardo-Manuel de Villena, F., and C. Sapienza. (2001) Female meiosis drives karyotypic evolution in mammals. *Genetics* 159:1179–1189.
- 202 Nadler CF, Lay DM and Hassinger JD (1971) Cytogenetics analyses of wild sheep populations in northern Iran. *Cytogenetics* 10, 137-152.
- 203 Nagamachi CY, Pieczarka JC and de Souza Barros RM (1992) Karyotypic evolution among *Cebuella pygamaea*, *Callithrix jacchus* and *C. emiliae* (Callitrichidae, Primates) and its taxonomic implications. *Genetica* 85, 249-257.
- 204 Nash WG, Wieneberg J, Ferguson-Smith MA, Menniger JC and O'Brien SJ (1998) Comparative genomics: tracking chromosome evolution in the family Ursidae using reciprocal chromosome painting. *Cytogenet. Cell Genet.* 83, 182-192.
- 205 Nichols WW, Levan A, Hansen-Melander E and Melander Y (1965) The idiogram of the rabbit. *Hereditas* 53, 63-76.
- 206 Niemitz C, Nietsch A, Warter S and Rumpler Y (1991) *Tarsius diana*: A new primate species from Central Sulawesi (Indonesia). *Folia Primatol.* 56, 105-116.

- 207 Nunez-Garduno A, Lopez-Wilchis R and Cervantes FA (1999) Chromosomal variation of *Osgoodomys banderanus* (Rodentia: Muridae) *Cytologia* 64, 319-326.
- 208 Ohno S, Jainchill J and Stenius C (1963) The creeping vole (*Microtus orgoni*) as a gonosomic mosaic. I. The OY/XY constitution of the male. *Cytogenetics* 2, 232-239.
- 209 Ortells MO, Contreras JR and Reig OA (1990) New *Ctenomys* karyotypes (Rodentia, Octodontidae) from north-eastern Argentina and from Paraguay confirm the extreme multiformity of the genus. *Genetica* 82, 189-201.
- 210 Pathak S, Hsu T, Shirley L and Helm JD (1973) Chromosome homology in the climbing rats, genus *Tylomys* (Rodentia:Cricetidae). *Chromosoma* 42, 215-228.
- 211 Pathak S, Shirley L and Johnson ML (1980) The chromosome banding patterns of the armadillo *Orycteropus afer* (Tubulidentata, Orycteropidae). *Experientia* 36, 547-548.
- 212 Patton JL (1967) Chromosome studies of certain pocket mice, genus *Perognathus*(Rodentia: Heteromidae) *J. Mamm.* 48, 27-37.
- 213 Patton JC and Baker RJ (1978) Chromosomal homology and evolution of Phyllostomatoid bats. *Syst. Zool.* 27, 449-462.

- 214 Patton JL and Sherwood SW (1982) Genome evolution in pocket gophers (Genus *Thomomys*). I. heterochromatin variation and speciation potential. *Chromosoma* 85, 149-162
- 215 Popescu NC and DiPaolo JA (1980) Chromosomal interrelationship of hamster species of the genus *Microcricetus*
- 216 Prouty LA, Buchanan PD, Pollitzer WS and Mootnick AR (1983) A presumptive new hylobatid subgenus with 38 chromosomes. *Cytogenet. Cell Genet.* 35, 141-142.
- 217 Qumsiyeh MB and Bickham (1993) Chromosomes and relationships of long-eared bats of the genera *Plecotus* and *Otonycteris*
- 218 Qumsiyeh MB, Owen RD and Chesser RK (1988) Differential rates of genic and chromosomal evolution in bats of the family *Rhinolophidae*. *Genome* 30, 326-335.
- 219 Qumsiyeh MB, Hamilton MJ, Dempster ER and Baker RJ (1991) Cytogenetics and systematics of the rodent genus *Gerbillurus*
- 220 Rambau RV, Harrison WR, Elder FFB and Robinson TJ (1997) Chromosomes of Brants' whistling rat and genome conservation in *Otomyinae* revealed by G-banding and fluorescence in situ hybridization. *Cytogenet Cell Genet* 78, 216-220.
- 221 Rao SRV, Shah VC and Seshadri C (1968) Studies on rodent chromosomes. III. The somatic chromosomes of the Indian gerbil *Tatera indica cuvierii* (Waterhouse). *Cytologia* 33, 477-481.

- 222 Ray-Chaudhuri SP, Sharma T, Pathak S and Singh L (1969) Chromosomes and the karyotype of the pangolin, *Manis pentadactyla* L. (Pholidota-Mammalia). *Experientia* 25, 1167-1168.
- 223 Reig OA and Kiblicky P (1968) Chromosomes in four species of rodents of the genus *Ctenomys* (Rodentia, Octodontidae) from Argentina. *Experientia* 24, 274-276
- 224 Reig OA and Bianchi NO (1969) The occurrence of an intermediate didelphid karyotype in the short tailed opossum (Genus *Monodelphis*). *Experientia* 25, 1210-1211.
- 225 Reig OA, Olivo N and Kiblicky P (1971) The idiogram of the Venezuelan vole mouse, *Akodon urichi venezuelensis*
- 226 Reig OA, Gardner AL, Bianchi NO and Patton JL (1977) The chromosomes of Didelphidae (Marsupialia) and their evolutionary significance. *Biol. J Linn. Soc.* 9, 191-216.
- 227 Reina JM, de Paz O, Perez-Suarez G and Navlet J (1994) Chromosome studies of six species of the genus *Myotis* (Chiroptera: Vespertilionidae) from Spain. *Cytologia* 59, 219-223.
- 228 Reumer JWF and Meylan A (1986) New developments in vertebrate cytotaxonomy IX\* Chromosome numbers in the order Insectivora (Mammalia). *Genetica* 70, 119-151.

- 229 Robbins LW and Baker RJ (1980) G- and C-band studies on the primitive karyotype for *Reithrodontomys*
- 230 Robinson TJ (1980) Comparative chromosome studies in the family Leporidae (Lagomorpha, Mammalia) *Cytogenet. Cell Genet.* 28, 64-70.
- 231 Robinson TJ and Condry PR (1979) The chromosomes of the southern elephant seal, *Mirounga leonina* (Phocidae: Mammalia). *Cytogenet. Cell Genet.* 23, 157-162.
- 232 Robinson TJ, Elder FFB and Chapman JA (1983) Evolution of chromosomal variation in cottontails, genus *Sylvilagus* (Lagomorpha, Mammalia): *S. aquaticus*, *S. floridanus* and *S. transitionalis*
- 233 Robinson TJ, Elder FFB and Chapman JA (1984) Evolution of chromosomal variation in cottontails, genus *Sylvilagus* (Mammalia: Lagomorpha). *Cytogenet Cell Genet* 38, 282-289.
- 234 Robinson TJ, Wilson V, Gallagher DS, Taylor JF, Davis SK, Harrison WR and Elder FFB (1996) Chromosomal evolution in duiker antelope (Cephalophinae: Bovidae): karyotype comparisons, fluorescence in situ hybridization, and rampant X chromosome variation. *Cytogenet Cell Genet.* 73, 116-122.
- 235 Rofe R and Hayman D (1985) G-banding evidence for a conserved complement in the Marsupialia. *Cytogenet. Cell Genet.* 39, 40-50.
- 236 Rogers DS and Heske EJ (1984) Chromosomal evolution of the brown mice, genus *Scotinomys* (Rodentia: Cricetidae). *Genetica* 63, 221-228.

- 237 Ruedas LA, Lee TE, Bickham JW and Schlitter DA (1990) Chromosomes of five species of Vespertilionid bats from Africa. *J. Mamm.* 71, 94-100.
- 238 Rumpler Y and Dutrillaux B (1976) Chromosomal evolution in Malagasy lemurs: I. Chromosome banding studies in the genera Lemur and Microcebus
- 239 Rumpler Y and Dutrillaux B (1978) Chromosomal evolution in Malagasy lemurs: III. Chromosome banding studies in the genus Hapalemur and the species Lemur catta
- 240 Rumpler Y and Dutrillaux B (1979) Chromosomal evolution in Malagasy lemurs: IV. Chromosome banding studies in the genera Phaner, Varecia, Lemur, Microcebus and Cheirogaleus
- 241 Rumpler Y, Couturier J, Warter S and Dutrillaux B (1983) Chromosomal evolution in Malagasy lemurs: VII. Phylogenetic relationships between Propithecus, Avahi (Indridae), Microcebus (Cheirogaleidae) and Lemur (Lemuridae). *Cytogenet. Cell Genet.* 36, 542-546.
- 242 Rumpler Y, Ishak B, Warter S and Dutrillaux B (1985) Chromosomal evolution in Malagasy lemurs: VIII. Chromosome banding studies of Lepilemur ruficaudatus, L. leucopus and L. septentrionalis

- 243 Rumpler Y, Ishak B, Dutrillaux B , Warter S and Ratsirarson J (1986) Chromosomal evolution in Malagasy lemurs: IX. Chromosome banding studies of *Lepilemur mustelinus*, *L. dorsalis* and *L. edwardsi* Cytogenet. Cell Genet. 42, 164-168.
- 244 Rumpler Y, Warter S, Meier B, Preuschoft H and Dutrillaux B (1987) Chromosomal phylogeny of three Lorisidae: *Loris tardigradus*, *Nycticebus coucang* and *Perodicticus potto*
- 245 Ryder OA (1978) Chromosomal polymorphism in *Equus hemionus*
- 246 Ryder OA and Chemnick LG (1990) Chromosomal and molecular evolution in Asiatic wild asses. *Genetica* 83, 67-72.
- 247 Ryder OA, Epel NC and Benirschke K (1978) Chromosome banding studies of the Equidae. Cytogenet. Cell Genet. 20, 323-350.
- 248 Saez FA, Drets ME and Brum-Zorrilla N (19 ) Karyotype of the "Carpincho"*Hydrochaeris hydrochareis uruguayensis* (Rodentia Hydrochaeridae) *Experientia*
- 249 Sangines N, and Aguilera M (1991) Chromosome polymorphism in *Holochilus venezuelae* (Rodentia, Cricetidae): C- and G- bands. *Genome* 34, 13-18.
- 250 Sbalqueiro IJ, Mattevi MS and Oliveira LFB (1984) An X1X1X2X2/X1X2Y mechanism of sex determination in a South American rodent, *Deltamys kempy* (Rodentia, Cricetidae). Cytogenet. Cell Genet. 38, 50-55.



- 251 Schmid W and Leppert MF (1968) Mammalian X-chromosomes: a new kind of composite type of X in the vole *Arvicola scherman* exitus Miller. *Experientia* 24, 277-279
- 252 Schmid M, Haaf T, Weis H and Schempp W (1986) Chromosomal homoeologies in hamster species of the genus *Phodopus* (Rodentia, Cricetinae). *Cytogenet. Cell Genet.* 43, 168-173.
- 253 Schmid M, Fernandez-Badillo A, Feichtinger W, Steinlein C and Roman JI (1988) On the highest chromosome number in mammals. *Cytogenet. Cell Genet.* 49, 305-308.
- 254 Schroeder J and van der Loo A (1978) Comparison of karyotypes in three species of rabbit: *Oryctolagus cuniculus*, *Sylvilagus nuttallii* and *S. idahoensis* *Hereditas* 91, 27-30.
- 255 Sharma T and Raman R (1972) Odd diploid number in both sexes and a unique multiple sex-chromosome system of a rodent *Vandeleuria o. oleracea* (Bennett) *Cytogenetics* 11, 247-258.
- 256 Sharma T and Raman R (1973) Variation of constitutive heterochromatin in the sex chromosomes of the rodent *Bandicota bengalensis bengalensis* (Gray). *Chromosoma* 41, 75-84.
- 257 Sharma T and Garg GS (1975) Constitutive heterochromatin and karyotype variation in Indian pygmy mouse, *Mus dunni*

- 258 Simmons EL (1988) A new species of *Propithecus* (Primates) from Northeast Madagascar. *Folia Primatol.* 50, 143-151.
- 259 Sinha AK (1967) Chromosome preparations of opossum leucocytes. *Experientia* 23, 671-672.
- 260 Sites JW, Bickham JW and Haiduk MW (1981) Conservative chromosomal change in the bat family Mormoopidae. *Can. J. Genet. Cytol.* 23, 459-467.
- 261 Souza MJ and Yonenaga-Yassuda Y (1982) Chromosomal variability of sex-chromosomes and NOR's in *Trichomys apereoides* (Rodentia, Echimyidae) *Cytogenet. Cell Genet.* 33, 197-203.
- 262 Sreepada KS, Narayana Naidu K and Edward Gururaj M (1993) Trends of karyotypic evolution in the genus *Hipposideros* (Chiroptera: Mammalia). *Cytobios* 75, 49-57.
- 263 Srivasta PK, Townsend JF, Stuhlman RA and Lucas FV (1974) Somatic chromosomes of the African white-tailed rat. *J. Hered.* 65, 223-226.
- 264 Stanyon R, Sineo L, Chiarelli, Camperio-Ciani A, Haimoff, Mootnick EH and Sutarman Drh (1987) Banded karyotypes of the 44-chromosome gibbons. *Folia Primatol.* 48, 56-64.
- 265 Stock AD (1975) Chromosome banding pattern homology and its phylogenetic implications in the bat genera *Carollia* and *Choeroniscus*

266 Stock AD (1975) Chromosome banding pattern relationships of hares, rabbits, and pikas (order Lagomorpha). A phyletic interpretation. *Cytogenet. Cell Genet.* 17, 78-88.

267 Stock AD (1981) Chromosomal variation and constitutive heterochromatin in three porpoise species (genus *Stenella*) *Cytogenet. Cell Genet.* 31, 91-100.

268 Stock AD (1983) Chromosomal homologies and phylogenetic relationships of the vespertilionid bat genera *Euderma*, *Idionnycteris* and *Plecotus*

269 Svartman M and Vianna-Morgante AM (1998) Karyotype evolution of marsupials: from higher to lower diploid numbers. *Cytogenet. Cell Genet.* 82, 263-266.

270 Tagle DA, Goodman M and Miller DA (1990) Characterization of chromosomes and localization of the rDNA locus in the aye-aye (*Daubentonia madagascariensis*). *Cytogenet. Cell Genet.* 54, 43-46.

271 Tanaka K, Matsuda Y, Masangkay JS, Solis CD, Anunciado RVP, Kuro-o M and Namikawa T (2000) Cytogenetic analysis of the Tamaraw (*Bubalus mindorensis*): A comparison of R-banded karyotype and chromosomal distribution of centromeric satellite DNAs, telomeric sequence, and 18S-28S rRNA genes with domestic water buffaloes. *J. Hered.* 91, 117-121.

- 272 Taylor KM, Hungerford DA, Snyder RL and Ulmer FA (1968) Uniformity of karyotypes in Camelidae. *Cytogenetics* 7, 8-15.
- 273 Uribe M, Laguarda A, Romero J, Paulete J and Scaglia de Paulete S (1974) Cytogenetic analysis of *Neotomodon alstoni alstoni*
- 274 Ushijima RN, Shinninger FS and Grand TI (1964) Chromosome complements of two species of primates: *Cynopithecus niger* and *Presbytis entellus*
- 275 Vassart M, Seguela and Hayes H (1995) Chromosomal evolution in gazelles. *J. Hered.* 86, 216-227.
- 276 Venkatasubba Rao SR and Sharda (1964) Somatic chromosomes of the Indian five striped squirrel *Funambulus pennanti* Wroughton. *Cytogenetics* 3, 342-346.
- 277 Viegas-Pequignot E, Dutrillaux B, Prod'Homme M and Petter E (1983) Chromosomal phylogeny of Muridae: a study of 10 genera. *Cytogenet. Cell Genet.* 35, 269-278.
- 278 Volleth M (1985) Chromosomal homologies of the genera *Vespertilio*, *Plecotus* and *Barbastella* (Chiropter: Vespertilionidae). *Genetica* 66, 231-236.
- 279 Volobouev V and Granjon L (1996) A finding of the XX/XY1Y2 sex-chromosome system in *Taterillus arenarius* (Gerbillinae, Rodentia) and its phylogenetic implications. *Cytogenet. Cell Genet.* 75, 45-48.

- 280 Volobouev V, Viegas-Pequignot E, Petter F and Dutrillaux B (1987). Karyotypic diversity and taxonomic problems in the genus *Arvicanthis* (Rodentia, Muridae). *Genetica* 72, 147-150.
- 281 Volobouev V, Viegas-Pequignot E, Petter F, Gautin JC, Sicard B and Dutrillaux B (1988) Complex chromosomal polymorphism in *Gerbillus nigeriae* (Rodentia, Gerbillidae). *J. Mamm.* 69, 131-134.
- 282 Walen KH and Madin SH (1965) Comparative chromosome analyses of the bottlenosed dolphin (*Tursiops truncatus*) and the pilot whale (*Globicephala scammonii*). *Am. Nat.* 99, 349-354.
- 283 Walker LI, Spotorno AE and Fernandez-Donoso R (1979) Conservation of whole arms during chromosomal divergence of phyllotine rodents. *Cytogenet. Cell Genet.* 24, 209-216.
- 284 Walker LI and Spotorno AE (1992) Tandem and centric fusions in the chromosomal evolution of the South American phyllotines of the genus *Aulicomys* (Rodentia, Cricetidae) *Cytogenet. Cell Genet.* 61, 135-140.
- 285 Warner JW, Patton JL, Gardner AL and Baker RJ (1974) Karyotypic analyses of twenty-one species of molossid bats (Molossidae: Chiroptera). *Can. J. Genet. Cytol.* 16, 165-176.
- 286 Warter S, Randrianasolo G, Dutrillaux B and Rumpler Y (1987) Cytogenetic study of a new subspecies of *Hapalemur griseus*

287 Warter S and Rumpler Y (1998) Chromosomal variability in the genus *Nycticebus*

288 Watson ED, Blumenthal HT and Hutton WE (1966) A method for the culture of leucocytes of the Guinea pig (*Cavia cobaya*) with karyotype analysis. *Cytogenetics* 5, 179-185.

289 Waugh O'Neill RJ, Eldrige MDB, Toder R, Ferguson-Smith MA, O'Brien PC and Graves JAM (1999) Chromosome evolution in kangaroos (Marsupialia: Macropodidae): Cross species chromosome painting between the tammar wallaby and rock wallaby spp. with the  $2n = 22$  ancestral macropodid karyotype. *Genome* 42, 525-530.

290 Wayne RK, Nash WG and O'Brien SJ (1987) Chromosomal evolution in Canidae. I Species with high diploid numbers. *Cytogenet. Cell Genet.* 44, 123-133.

291 Wayne RK, Nash WG and O'Brien SJ (1987) Chromosomal evolution in Canidae. II. Divergence from the primitive carnivore karyotype. *Cytogenet. Cell Genet.* 44, 134-141.

292 Williams DF (1978) Karyological affinities of the species groups of silky pocket mice (Rodentia, Heteromyidae) *J. Mamm.* 59, 599-612.

293 Williams SL and Genoways HH (1975) Karyotype of *Geomys pinnetis* (Mammalia: Geomyidae) with a discussion of the chromosomal

- 294 Wrigley JM and Graves JAM (1988) Karyotypic conservation in the mammalian order monotremata (subclass Prototheria). *Chromosoma* 96, 231-247.
- 295 Wurster DH (1972) Sex-chromosome translocations and karyotypes in bovid tribes. *Cytogenetics* 11, 197-207.
- 296 Wurster DH and Benirschke K (1968) The chromosomes of the Great Indian Rhinoceros (*Rhinoceros unicornis* L) *Experientia* 24, 511.
- 297 Wurster DH, Snapper JR and Benirschke K (1971) Unusually large sex chromosomes: new methods of measuring and description of karyotypes of six rodents (Myomorpha and Hystricomorpha) and one lagomorph (Ochotonidae). *Cytogenetics* 10, 153-176.
- 298 Wurster-Hill DH (1973) Chromosomes of eight species from five families of Carnivora. *J Mamm.* 54, 753-760.
- 299 Wurster-Hill DH and Gray CW (1973) Giemsa banding patterns in the chromosomes of twelve species of cats (Felidae). *Cytogenet. Cell Genet.* 12, 377-397.
- 300 Wurster-Hill DH and Gray CW (1975) The interrelationships of chromosome banding patterns in procyonids, viverrids and felids. *Cytogenet. Cell Genet.* 15, 306-331.
- 301 Wurster-Hill DH and Centerwall WR (1982) The interrelationships of chromosome banding patterns in canids, hyena and felids. *Cytogenet. Cell Genet.* 34, 178-192.

- 302 Wurster-Hill DH, Dol T, Izawa M and Ono Y (1987) Banded chromosome study of the Iriomote cat J. Hered. 78, 105-107.
- 303 Yang F, O'Brien PCM, Wienberg J and Ferguson-Smith MA (1997) Evolution of the black muntjac (*Muntiacus crinifrons*) karyotype revealed by comparative chromosome painting. Cytogenet. Cell Genet. 76, 159-163.
- 304 Yong HS (1984) Roberstonian translocation, pericentric inversion and heterochromatin block in the evolution of the tailless fruit bat. *Experientia* 40, 875-876.
- 305 Yong HS, Dhaliwal SS and Teh KL (1971) Somatic chromosomes of the flat-headed bats (*Tylonicteris* spp) *Experientia* 27, 1353
- 306 Yunis JJ and Prakash O (1982) The origin of man , a chromosomal pictorial legacy. *Science* 215, 1525- 1530.
- 307 Yunis EJ, Torres de Caballero OM, Ramirez C and Ramirez Z E (1976) Chromosomal variations in the primate *Alouatta seniculus seniculus*
- 308 García, L., Ponsa, M., Egozcue, J., and M. García, M. (2002a) Comparative chromosomal analysis and phylogeny in four *Ctenomys* species (Rodentia, Octodontidae). *Biol J Linn Soc* 69:103–120, Blackwell Publishing, Oxford.
- 309 Gallardo, M. H. (1979) The Chilean species of *Ctenomys* (Rodentia, Octodontidae) I. Karyotypical stability. *Arch Biol Med Exper* 12:71–82.



- 310 Sreepada, K. S., Naidu, K. N., and Gururaj, M. E. (1995) Chromosomal variations in four Indian species of *Taphozous* (Chiroptera: Mammalia). *Biol Zent bl* 114:307–314.
- 311 Wurster-Hill, D. H., and Gray, C. W. (1975) The interrelationships of chromosome banding patterns in procyonids, viverrids, and felids. *Cytogenet Cell Genet* 15:306–331.
- 312 Nash (Unpublished)
- 313 Yang and Nie (Unpublished)
- 314 CRES San Diego (Unpublished)
- 315 Arnason, U. (1981) Banding studies on the gray and sperm whale karyotypes. *Hereditas* 95:277–281.
- 316 Arnason, U. (1974a) Comparative chromosome studies in Cetacea. *Hereditas* 77:1–36.
- 317 Arnason, U., and Widegren, B. (1989) Composition and chromosomal localization of cetacean highly repetitive DNA with special reference to the blue whale, *Balaenoptera musculus*. *Chromosoma (Berlin)* 8:323–329.
- 318 Stanyon, R., Consigliere, S., Muller, S., Morescalchi, A., Neusser, M., and Wienberg, J. (2000) Fluorescence in situ hybridization (FISH) maps chromosomal homologies between the dusky titi and squirrel monkey. *Am J Primatol* 50:95–107.

- 319 Silva, M. J., and Yonenaga-Yassuda, Y. (1998) Karyotype and chromosomal polymorphism of an undescribed Akodon from Central Brazil, a species with the lowest known diploid chromosome number in rodents. *Cytogenet Cell Genet* 81:46–50.
- 320 Popescu, N. C., and DiPaolo, J. A. (1980) Chromosomal interrelationship of hamster species of the genus *Mesocricetus*. *Cytogenet Cell Genet* 28:10–23.
- 321 Rens, W., Grutzner R., O'Brien, P. C. M., Fairclough, H., Graves, J. A. M., and Ferguson-Smith, M. A. (2004) Resolution and evolution of the duck-billed platypus karyotype with an X1U1X2Y2X3Y3X4Y4X5Y5 male sex chromosome constitution. *Proc Natl Acad Sci USA* 101:16257–16261.
- 322 Beklemisheva et al. (2011) Reconstruction of karyotype evolution in core Glires. I. The genome homology revealed by comparative chromosome painting. *Chromosome Research*, 19:549:565.
- 323 Badenhorst et al. (2011) Chromosome evolution in Rattini (Muridae, Rodentia). *Chromosome Research*, 19:709–727.
- 324 Bigoni et al. (2003) Chromosome Painting Shows That the Proboscis Monkey (*Nasalis larvatus*) Has a Derived Karyotype and Is Phylogenetically Nested Within Asian

Colobines. *American Journal of Primatology*, 60:85-93.

325 Biltueva and Vorobieva (2012) Chromosome Evolution in Eulipotyphla. *Cytogenetic and Genome Research*, 137:154-164.

326 de Oliveira et al. (2012) Chromosome Evolution in New World Monkeys (Platyrrhini). *Cytogenetic and Genome Research*, 137:259-272.

327 Deuve et al. (2008) Chromosomal phylogeny and evolution of the African mole-rats (Bathyergidae). *Chromosome Research*, 16:57-74.

328 Graphodatsky et al. (2008) Phylogenomics of the dog and fox family (Canidae, Carnivora) revealed by chromosome painting. *Chromosome Research*, 16:129:143.

329 Hass et al. (2011) Comparative Chromosome Maps of Neotropical Rodents *Necromys lasiurus* and *Thaptomys nigrita* (Cricetidae) Established by ZOO-FISH. *Cytogenetic and Genome Research*, 135:42-50.

330 Lemskaya et al. (2010) Chromosomal evolution of Arvicolinae (Cricetidae, Rodentia). III. Karyotype relationships of ten *Microtus* species. *Chromosome Research*, 18:459-471.

- 331 Muller et al. (2003) Chromosomal phylogeny and evolution of gibbons (Hylobatidae). *Hum. Genet.*, 113 : 493–501.
- 332 Nie (2012) Molecular Cytogenetic Studies in Strepsirrhine Primates, Dermoptera and Scandentia. *Cytogenetic and Genome Research*, 137:246-258.
- 333 Pardini et al. (2007) Chromosome painting among Proboscidea, Hyracoidea and Sirenia: support for Paenungulata (Afrotheria, Mammalia) but not Tethytheria. *Proc. R. Soc. B*: 274.
- 334 Richard et al. (2003) Highly conserved chromosomes in an Asian squirrel (*Menetes berdmorei*, Rodentia: Sciuridae) as demonstrated by ZOO-FISH with human probes. *Chromosome Research*, 11:597-603.
- 335 Romanenko et al. (2007) Karyotype evolution and phylogenetic relationships of hamsters (Cricetidae, Muroidea, Rodentia) inferred from chromosomal painting and banding comparison. *Chromosome Research*, 15:283-297.
- 336 Rubes et al. (2012) Comparative Molecular Cytogenetics in Cetartiodactyla.

Cytogenetic and Genome Research, 137:194-207.

337 Sannier et al. (2011) Conserved although Very Different Karyotypes in Gliridae and Sciuridae and Their Contribution to Chromosomal Signatures in Glires. Cytogenetic and Genome Research, 134:51-63.

338 Sotero-Caio et al. (2013) Chromosomal evolution among leaf-nosed nectarivorous bats – evidence from cross-species chromosome painting (Phyllostomidae, Chiroptera). BMC Evolutionary Biology,13:276.

339 Swier et al. (2009) Patterns of Chromosomal Evolution in Sigmodon , Evidence from Whole Chromosome Paints. Cytogenetic and Genome Research, 125:54-66.

340 Tian et al. (2004) Chromosome evolution in bears: reconstructing phylogenetic relationships by cross-species chromosome painting. Chromosome Research, 12:55-63.

341 Trifonov et al. (2012) Chromosome Evolution in Perissodactyla. Cytogenetic and Genome Research, 137:208-217.

342 Veyrunes et al. (2006) Phylogenomics of the genus Mus (Rodentia; Muridae): extensive genome repatterning is not restricted to the house mouse. Proceeding Royal

Society B. 273:2925–2934.

343 Nie et al. (2012) Chromosomal rearrangements and karyotype evolution in carnivores revealed by chromosome painting. *Heredity*, 108:17-27.

344 Richards et al. (2010) Cross-species chromosome painting in bats from Madagascar: the contribution of Myzopodidae to revealing ancestral syntenies in Chiroptera. *Chromosome Research*, 18:635-653.
